# Supplementary material for: Roseobacters in a Sea of Poly- and Paraphyly: Whole Genome-Based Taxonomy of the Family Rhodobacteraceae and the Proposal for the Split of the “Roseobacter Clade” Into a Novel Family, Roseobacteraceae fam. nov
Source: Front Microbiol. 2021 Jun 25;12:683109. doi: 10.3389/fmicb.2021.683109 (PMC8267831; doi:10.3389/fmicb.2021.683109)
Supplement: Supplementary file 4 [file Table_3.xlsx]

## Sheet: CheckM
Supplementary Table 3. CheckM results based on quality check criteria of ≥95% completeness and ≤5% contamination.
Isolate name	Completeness (%)	Contamination (%)	Used in this study
Actibacterium atlanticum 22II-S11-z10	98.52	1.01	Y
Actibacterium mucosum KCTC 23349	99.39	0.97	Y
Actibacterium pelagium JN33	99.7	0.91	Y
Actibacterium ureilyticum LS-811	100	0.67	Y
Acuticoccus yangtzensis JL1095	96.49	0.79	Y
Aestuariivita boseongensis BS-B2	99.36	0.65	Y
Ahrensia kielensis DSM 5890	98.48	1.05	Y
Ahrensia marina LZD062	99.48	0.39	Y
Albidovulum inexpectatum DSM 12048	100	0.4	Y
Albidovulum xiamenense CGMCC 1.10789	99.47	0	Y
Albimonas donghaensis DSM 17890	100	0	Y
Albimonas pacifica CGMCC 1.11030	100	0.1	Y
Aliiroseovarius crassostreae CV919-312	99.6	1.08	Y
Aliiroseovarius halocynthiae MA1 10 1	99.39	0.4	Y
Aliiroseovarius pelagivivens CECT 8811	99.24	0.61	Y
Aliiroseovarius sediminilitoris DSM 29439	99.8	0.45	Y
Amylibacter kogurei strain 4G11	98.18	0	Y
Antarctobacter heliothermus DSM 11445	99.6	0.8	Y
Aquimixticola soesokkakensis CECT 8620	99.55	0.3	Y
Ascidiaceihabitans donghaensis CECT 8599	99.15	0	Y
Boseongicola aestuarii CECT 8489	98.73	0.36	Y
Brevirhabdus pacifica 22DY15	96.62	2.12	Y
Celeribacter baekdonensis DSM 27375	99.24	0.3	Y
Celeribacter ethanolicus NH195	99.55	4.6	Y
Celeribacter halophilus ZXM137	98.94	0.25	Y
Celeribacter indicus P73	99.55	0.33	Y
Celeribacter manganoxidans DY25	99.09	0	Y
Celeribacter marinus IMCC 12053	99.24	0.3	Y
Celeribacter neptunius DSM 26471	99.24	0.66	Y
Celeribacter persicus DSM 100434	99.24	0.82	Y
Cereibacter changlensis DSM 18774	99.7	0.51	Y
Citreimonas salinaria DSM 26880	98.8	2.5	Y
Cognatishimia maritima DSM 28223	99.89	0.32	Y
Cognatiyoonia koreensis DSM 17925	98.94	0.23	Y
Cognatiyoonia sediminum DSM 28715	98.79	0.45	Y
Confluentimicrobium lipolyticum CECT 8621	99.6	0.3	Y
Cribrihabitans marinus DSM 29340	100	0.59	Y
Defluviimonas alba cai42	98.28	0.45	Y
Defluviimonas aquaemixtae CECT 8626	100	0.3	Y
Defluviimonas denitrificans DSM 18921	99.7	0.38	Y
Defluviimonas indica DSM 24802	99.75	1.06	Y
Dinoroseobacter shibae DFL 12	99.09	0.15	Y
Donghicola eburneus DSM 29127	98.8	0.65	Y
Donghicola tyrosinivorans DSM 100212	98.95	1.2	Y
Epibacterium mobile DSM 23403	99.12	0.53	Y
Epibacterium multivorans DSM 26470	98.94	0.14	Y
Epibacterium scottomollicae DSM 25328	99.69	0	Y
Epibacterium ulvae U95	98.76	1.71	Y
Flavimaricola marinus CECT 8899	99.54	2.07	Y
Gemmobacter aquatilis DSM 3857	99.39	0	Y
Gemmobacter caeni DSM 21823	99.39	2.83	Y
Gemmobacter megaterium DSM 26375	98.61	0.3	Y
Gemmobacter nectariphilus DSM 15620	99.32	0.98	Y
Haematobacter massiliensis CCUG 47968	98.94	0.38	Y
Haematobacter missouriensis H1892	99.39	1.19	Y
Halocynthiibacter arcticus PAMC 20958	98.85	0.56	Y
Halocynthiibacter namhaensis RA2-3	99.39	0.3	Y
Hasllibacter halocynthiae DSM 29318	97.12	0.45	Y
Hwanghaeicola aestuarii DSM 22009	98.79	1.03	Y
Jannaschia aquimarina GSW-M26	98.26	0.61	Y
Jannaschia donghaensis CECT 7802	98.54	0.91	Y
Jannaschia faecimaris DSM 100420 coontigs	98.91	0.57	Y
Jannaschia helgolandensis DSM 14858	99.18	0.15	Y
Jannaschia pohangensis DSM 19073	98.99	0.61	Y
Jannaschia rubra CECT 5088	99.15	0.44	Y
Jannaschia seohaensis DSM 25227	99.29	1.06	Y
Jhaorihella thermophila DSM 23413	99.36	0.16	Y
Kandeliimicrobium roseum XY-R6	99.19	0.76	Y
Leisingera aquaemixtae CECT 8399	99.8	1.06	Y
Leisingera aquimarina DSM 24565	99.82	0	Y
Leisingera caerulea DSM 24564	99.65	0	Y
Leisingera daeponensis DSM 23529	99.65	0	Y
Leisingera methylohalidivorans DSM 14336	99.12	0	Y
Limimaricola cinnabarinus LL-001	96.6	0.61	Y
Limimaricola hongkongensis DSM 17492	98.59	0	Y
Limimaricola pyoseonensis DSM 21424	98.94	0.56	Y
Limimaricola soesokkakensis CECT 8367	98.94	0.47	Y
Litoreibacter albidus DSM 26922 coontigs	99.7	0	Y
Litoreibacter arenae DSM 19593	100	0.1	Y
Litoreibacter ascidiaceicola DSM 100566	99.47	0.15	Y
Litoreibacter halocynthiae MA1-10 1	99.55	0	Y
Litoreibacter janthinus DSM 26921	99.7	1.82	Y
Litoreibacter meonggei DSM 29466	99.39	0.3	Y
Litoreibacter ponti DSM 100977	99.7	0.61	Y
Litorimicrobium taeanense DSM 22007	98.72	0	Y
Loktanella atrilutea DSM 29326	99.09	1.39	Y
Loktanella fryxellensis DSM 16213	98.93	0.06	Y
Loktanella salsilacus DSM 16199	99.09	0.98	Y
Lutimaribacter litoralis KU5D5 1	99.4	0.3	Y
Lutimaribacter pacificus W11 2B 1	99.37	0.8	Y
Lutimaribacter saemankumensis DSM 28010	99.55	0	Y
Maliponia aquimaris CECT 8898	99.7	2.61	Y
Mameliella alba CGMCC 1.7290	99.6	0.15	Y
Maribius pelagius DSM 26893	99.2	1.06	Y
Maribius pontilimi GH1 23 1	99.48	0.86	Y
Maribius salinus DSM 26892	99.24	0.3	Y
Marinibacterium profundimaris 22II1-22F33	99.36	0.49	Y
Marinovum algicola FF3	99.34	0.53	Y
Maritimibacter alkaliphilus HTCC2654	99.7	0.36	Y
Marivita cryptomonadis CL-SK44	98.72	1.53	Y
Marivita geojedonensis DPG-138	98.8	0.3	Y
Marivita hallyeonensis DSM 29431	98.34	0.65	Y
Marivivens niveibacter MCCC 1A06712	100	1.01	Y
Methylarcula marina VKM B-2159	98.34	0.3	Y
Monaibacterium marinum C7	100	0	Y
Neptunicoccus sediminis CY02	99.8	0.42	Y
Nereida ignava CECT 5292	99.09	1.47	Y
Nioella nitratireducens SSW136	99.94	0.15	Y
Nioella sediminis JS7-11	99.69	0.34	Y
Oceanicella actignis CGMCC 1.10808	99.87	0	Y
Oceanicola granulosus HTCC2516	99.24	0.45	Y
Oceanicola litoreus DSM 29440	98.69	0.2	Y
Oceaniglobus indicus 1-19b	99.9	0.56	Y
Oceaniovalibus guishaninsula JLT2003	98.48	0.15	Y
Octadecabacter antarcticus 307	99.39	0.35	Y
Octadecabacter arcticus 238	99.29	0.91	Y
Octadecabacter ascidiaceicola CECT 8868	99.39	0.2	Y
Octadecabacter temperatus SB1	99.39	0.61	Y
Pacificibacter marinus DSM 25228	96.82	0.71	Y
Pacificibacter maritimus DSM 104731	98.18	0	Y
Paenirhodobacter enshiensis DW2-9	98.08	0.15	Y
Palleronia abyssalis CECT 8504	98.7	1.01	Y
Palleronia marisminoris CECT 7066	99.29	0.15	Y
Paracoccus aestuarii DSM 19484	98.79	0.61	Y
Paracoccus alcaliphilus DSM 8512	99.09	0.91	Y
Paracoccus alkenifer DSM 11593	98.28	0.76	Y
Paracoccus aminophilus JCM 7686	99.29	0.61	Y
Paracoccus aminovorans DSM 8537	99.39	0.45	Y
Paracoccus bengalensis DSM 17099	99.39	1.44	Y
Paracoccus chinensis CGMCC 1.7655	98.79	0.3	Y
Paracoccus contaminans RKI 16-01929	98.17	0.15	Y
Paracoccus halophilus CGMCC 1.6117	99.64	0.4	Y
Paracoccus homiensis DSM 17862	99.39	0.91	Y
Paracoccus isoporae DSM 22220	98.18	0	Y
Paracoccus laeviglucosivorans 3P 1	99.32	0.86	Y
Paracoccus lutimaris strain CECT 8525	99.6	0.56	Y
Paracoccus pantotrophus DSM 2944	99.39	0.4	Y
Paracoccus saliphilus DSM 18447	99.39	1.62	Y
Paracoccus sanguinis DSM 29303	99.9	0	Y
Paracoccus sediminis DSM 26170	98.48	0	Y
Paracoccus seriniphilus DSM 14827	99.09	0.61	Y
Paracoccus siganidrum strain M26	99.09	1.01	Y
Paracoccus solventivorans DSM 6637	98.79	0.45	Y
Paracoccus sphaerophysae HAMBI 3106	98.74	0.61	Y
Paracoccus sulfuroxidans LW36 1	99.62	1.67	Y
Paracoccus tibetensis CGMCC 1.8925	99.39	0.71	Y
Paracoccus versutus DSM 582	99.39	0.53	Y
Paracoccus yeei ATCC BAA-599	99.55	0.61	Y
Paracoccus zeaxanthinifaciens ATCC 21588	97.97	0	Y
Paracoccus zhejiangensis J6	98.99	0.3	Y
Pararhodobacter aggregans D1-19	99.39	1.11	Y
Pararhodobacter marinus CIC4N-9	98.99	1.57	Y
Pelagibaca abyssi JLT2014	99.3	0.73	Y
Pelagicola litorisediminis CECT 8287	99.62	0.02	Y
Pelagimonas varians DSM 23678	99.7	1.28	Y
Pelagivirga sediminicola BH-SD19	99.37	0.33	Y
Phaeobacter gallaeciensis DSM 26640	99.47	0	Y
Phaeobacter inhibens DSM 16374	99.77	0	Y
Phaeobacter italicus CECT 7645	99.77	0	Y
Phaeobacter porticola strain P97	99.18	0	Y
Planktomarina temperata RCA23	98.65	0.35	Y
Planktotalea arctica IMCC9565	99.57	0.16	Y
Planktotalea frisia SH6-1	99.57	0	Y
Ponticoccus marisrubri SJ5A-1	99.1	0.38	Y
Ponticocus litoralis GL GR66	98.85	2.9	Y
Pontivivens insulae CeCT 8812	100	0.1	Y
Poseidonocella pacifica DSM 29316	99.09	0.04	Y
Poseidonocella sedimentorum KMM 9023	98.12	0.61	Y
Primorskyibacter insulae CECT 8871	98.69	1.81	Y
Primorskyibacter marinus PX7	99.39	0.3	Y
Pseudaestuariivita atlantica 22II-S11-z3	98.85	0.36	Y
Pseudodonghicola xiamenensis DSM 18339	99.89	0.72	Y
Pseudooceanicola antarcticus Ar-45	99.07	0.9	Y
Pseudooceanicola atlanticus 2II-s11g	99.7	1.12	Y
Pseudooceanicola batsensis HTCC2597	99.7	0.45	Y
Pseudooceanicola flagellatus CGMCC 1.12644	99.39	0	Y
Pseudooceanicola lipolyticus 157	96.21	0.63	Y
Pseudooceanicola marinus LMG 23705	98.49	0.25	Y
Pseudooceanicola nanhaiensis DSM 18065	99.4	0.3	Y
Pseudooceanicola nitratireducens DSM 29619	99.07	0.45	Y
Pseudooctadecabacter jejudonensis CECT 8397	99.37	0.15	Y
Pseudopelagicola gijangensis DSM 100564	100	1.22	Y
Pseudophaeobacter arcticus DSM 23566	99.82	0	Y
Pseudophaeobacter leonis 306	96.18	0.88	Y
Pseudorhodobacter antarcticus CGMCC 1.10836	99.6	0.3	Y
Pseudorhodobacter aquimaris KCTC 23043	98.48	0.3	Y
Pseudorhodobacter ferrugineus DSM 5888	99.55	0.08	Y
Pseudorhodobacter psychrotolerans PAMC 27389	99.64	0.25	Y
Pseudorhodobacter wandonensis KCTC 23672	100	0	Y
Pseudoroseicyclus aestuarii CECT 9025	97.17	0.45	Y
Pseudoruegeria aquimaris CECT 7680	98.69	0.76	Y
Pseudoruegeria haliotis DSM 29328	99.32	1.18	Y
Pseudoruegeria lutimaris DSM 25294	99.15	2.21	Y
Pseudoruegeria marinistellae SF-16	99.02	2.65	Y
Pseudoruegeria sabulilitoris GJMS-35	100	1.97	Y
Puniceibacterium antarcticum SM1211	99.55	1.27	Y
Puniceibacterium sediminis DSM 29052	99.44	1.06	Y
Rhodobaca barguzinensis alga05	98.98	0.4	Y
Rhodobacter aestuarii DSM 19945	98.48	0	Y
Rhodobacter azotoformans KA25	99.7	0.53	Y
Rhodobacter blasticus DSM 2131	99.08	0.76	Y
Rhodobacter capsulatus DSM 1710	98.79	0.56	Y
Rhodobacter johrii JA192	99.7	0.15	Y
Rhodobacter maris JA276	98.79	0.1	Y
Rhodobacter megalophilus DSM 18937	99.7	0.3	Y
Rhodobacter ovatus JA234	99.7	0.3	Y
Rhodobacter sphaeroides 2.4.1	99.39	0	Y
Rhodobacter veldkampii DSM 11550	98.79	0.18	Y
Rhodobacter vinaykumarii JA123	99.39	0.3	Y
Rhodobacter viridis JA737	98.48	0.4	Y
Rhodosalinus sediminis WDN1C137	98.97	0.38	Y
Rhodovulum imhoffii DSM 18064	98.79	0.61	Y
Rhodovulum kholense DSM 19783	99.29	1.21	Y
Rhodovulum robiginosum DSM 12329	98.89	0.45	Y
Rhodovulum sulfidophilum DSM 1374	99.29	0.91	Y
Rhodovulum viride JA756	100	1	Y
Roseibaca calidilacus HL-91	100	0.8	Y
Roseibaca ekhonensis CECT 7235	99.13	0.66	Y
Roseibacterium elongatum DSM 19469	97.94	0.91	Y
Roseicitreum antarcticum CGMCC 1.8894	98.69	1.36	Y
Roseicyclus mahoneyensis DSM 16097	98.42	0.61	Y
Roseinatronobacter thiooxidans ALG1	99.4	0.4	Y
Roseisalinus antarcticus CECT 7023	99.39	0.3	Y
Roseivivax halodurans JCM 10272	98.24	1.27	Y
Roseivivax halotolerans JCM 10271	98.74	1.05	Y
Roseivivax isoporae LMG 25204	98.49	2.46	Y
Roseivivax jejudonensis CECT 8625	99.1	0.88	Y
Roseivivax lentus DSM 29430	98.49	0.9	Y
Roseivivax marinus DSM 27511	99	0.53	Y
Roseivivax pacificus DSM 29329	98.19	1.38	Y
Roseivivax roseus DSM 23042	99.65	0.81	Y
Roseobacter denitrificans OCh 114 DSM 7001	99.25	0	Y
Roseobacter litoralis Och 149	98.94	0.32	Y
Roseovarius aestuarii CECT 7745	99.49	0.85	Y
Roseovarius albus CECT 7450	99.25	0.3	Y
Roseovarius atlanticus R12B	99.45	1.36	Y
Roseovarius azorensis DSM 100674	99.45	0.25	Y
Roseovarius confluentis SAG6	99.45	1.51	Y
Roseovarius gaetbuli CECT 8370	99.9	0.3	Y
Roseovarius halotolerans DSM 29507	99.6	0.64	Y
Roseovarius indicus B108	99.1	2.1	Y
Roseovarius litoreus 1	99.6	0.1	Y
Roseovarius lutimaris DSM 28463	99.84	0.83	Y
Roseovarius marisflavi DSM 29327	99.8	0.47	Y
Roseovarius mucosus DSM 17069	99.3	0.4	Y
Roseovarius nanhaiticus DSM 29590	99.35	0.6	Y
Roseovarius nitratireducens TFZ	99.1	0.9	Y
Roseovarius nubinhibens ISM	99.75	0.3	Y
Roseovarius pacificus DSM 29589	99.25	0.88	Y
Roseovarius salinarum N53	99.9	0.44	Y
Roseovarius tolerans DSM 11457	99.4	0.4	Y
Rubrimonas cliftonensis DSM 15345	99.4	1	Y
Ruegeria arenilitoris CECT 8715	99.57	0.32	Y
Ruegeria atlantica CECT 4292	99.57	0.11	Y
Ruegeria conchae TW15	99.57	0	Y
Ruegeria denitrificans CECT 5091	99.79	0	Y
Ruegeria Faecimaris HD 28 2	99.47	0.32	Y
Ruegeria halocynthiae DSM 27839	99.57	0.68	Y
Ruegeria intermedia CC GIMAT 2 1	99.57	0.32	Y
Ruegeria kandeliae J95	99.25	1.18	Y
Ruegeria lacuscaerulensis ITI-1157	99.57	0.32	Y
Ruegeria litorea R37 CECT 7639	99.47	0.96	Y
Ruegeria marina CGMCC 1.9108	99.57	1.09	Y
Ruegeria marisrubri ZGT118	99.57	0.64	Y
Ruegeria mediterranea M17	99.15	0	Y
Ruegeria meonggei CECT 8411	99.57	0.32	Y
Ruegeria pomeroyi DSS-3	96.49	0	Y
Ruegeria profundi ZGT108	99.47	0	Y
Sagittula stellata E-37	99.68	0.3	Y
Salinihabitans flavidus DSM 27842	99.3	0.45	Y
Salipiger aestuarii DSM 22011	99.6	0.9	Y
Salipiger bermudensis HTCC2601	99.6	0.45	Y
Salipiger marinus DSM 26424	99.1	3.26	Y
Salipiger mucosus DSM 16094	96.27	1.05	Y
Salipiger profundus JLT2016	99.17	0.6	Y
Salipiger thiooxidans DSM 10146	99.6	0.85	Y
Sedimentitalea nanhaiensis DSM 24252	99.89	0.32	Y
Sediminimonas qiaohouensis DSM 21189	99.55	0.3	Y
Shimia abyssi DSM 100673	99.25	0.91	Y
Shimia aestuarii DSM 15283	99.57	0.32	Y
Shimia haliotis DSM 28453	99.32	0	Y
Shimia isoporae SW6 1	99.36	0.38	Y
Shimia marina CECT 7688	97.71	0.8	Y
Shimia sagamensis JAMH011 1	99.36	0.38	Y
Silicimonas algicola DSM 103371	98.64	0.26	Y
Sulfitobacter brevis DSM 11443	99.49	0.34	Y
Sulfitobacter delicatus DSM 16477	99.57	0.48	Y
Sulfitobacter donghicola DSW-25	99.68	0.02	Y
Sulfitobacter dubius DSM 16472	99.36	0	Y
Sulfitobacter geojensis MM-124	99.68	0.64	Y
Sulfitobacter guttiformis DSM 11458	99.25	0.91	Y
Sulfitobacter indolifex HEL-45	99.68	0	Y
Sulfitobacter litoralis DSM 17584	99.36	0.32	Y
Sulfitobacter marinus DSM 23422	99.36	0.11	Y
Sulfitobacter mediterraneus DSM 12244	99.89	0.38	Y
Sulfitobacter noctilucae NB-68	99.36	0	Y
Sulfitobacter noctilucicola NB-77	99.36	0.43	Y
Sulfitobacter pontiacus DSM 10014	99.68	0	Y
Sulfitobacter pseudonitzschiae H3	99.68	0.16	Y
Tabrizicola aquatica RCRI19 conrigs	99.64	0	Y
Thalassobacter stenotrophicus CECT 5294	99.33	1.06	Y
Thalassobius activus CECT 5113	97.71	0	Y
Thalassobius autumnalis CECT 5118	98.94	0.06	Y
Thalassobius gelatinovorus CECT 4357	99.25	0	Y
Thalassobius mediterraneus CECT 5383	99.04	0	Y
Thalassococcus halodurans DSM 26915	98.95	0.3	Y
Thioclava arenosa CAU 1312	99.09	0	Y
Thioclava atlantica 13D2W-2	99.29	0.52	Y
Thioclava dalianensis strain DLFJ1-1	99.39	0.29	Y
Thioclava electrotropha Elox9	99.39	0.15	Y
Thioclava indica strain DT23-4	99.7	0	Y
Thioclava marina 11-10-0-13	99.09	0.21	Y
Thioclava nitratireducens 25B10 4	99.39	0.45	Y
Thioclava pacifica DSM 10166	99.7	0.52	Y
Thioclava sediminum TAW-CT134	99.39	0.45	Y
Tranquillimonas alkanivorans DSM 19547	99.7	0.74	Y
Tritonibacter horizontis O3.65	99.12	0.47	Y
Tropicibacter naphthalenivorans DSM 19561	100	0.55	Y
Tropicibacter phthalicicus CECT 8649	99.3	0.92	Y
Tropicimonas isoalkanivorans DSM 19548	99	2.28	Y
Tropicimonas sediminicola DSM 29339	99.3	1.23	Y
Wenxinia marina DSM 24838	99.39	0.45	Y
Wenxinia saemankumensis DSM 100565	99.09	0.61	Y
Yangia pacifica CGMCC 1.3455	99.3	2.36	Y
Yoonia litorea DSM 29433	99.7	0.08	Y
Yoonia maricola DSM 29128	99.7	0.08	Y
Yoonia maritima DSM 101533	99.03	0.76	Y
Yoonia rosea DSM 29591	100	0	Y
Yoonia sediminilitoris DSM 29955	98.94	0	Y
Yoonia tamlensis DSM 26879	99.39	0.3	Y
Yoonia vestfoldensis DSM 16212	99.29	0	Y
Acuticoccus kandeliae J103	100	12.77	N
Gemmobacter intermedius 1	49.11	146.21	N
Halichondribacter symbioticus Hp-f2	87.55	8.5	N
Jannaschia seosinensis CECT 7799	91.49	0.45	N
Mangrovicoccus ximenensis T1lg56	83.38	1.81	N
Paracoccus denitrificans JCM 21484	67.97	2.25	N
Paracoccus mutanolyticus RSP-02	25.23	0	N
Pelagicola litoralis CL ES2 1	92.67	0.32	N
Pontibaca methylaminivorans DSM 21219	94.66	0.64	N
Rubellimicrobium mesophilum DSM 19309	93.22	0.84	N
Rubellimicrobium thermophilum DSM 16684	87.51	0	N
