# Supplementary material for: Roseobacters in a Sea of Poly- and Paraphyly: Whole Genome-Based Taxonomy of the Family Rhodobacteraceae and the Proposal for the Split of the “Roseobacter Clade” Into a Novel Family, Roseobacteraceae fam. nov
Source: Front Microbiol. 2021 Jun 25;12:683109. doi: 10.3389/fmicb.2021.683109 (PMC8267831; doi:10.3389/fmicb.2021.683109)
Supplement: Supplementary file 5 [file Table_4.xlsx]

## Sheet: Within genera
Supplementary Table 4. Genomic metrics for comparisons within and between recognized monophyletic genera.
Query	Subject	16S rRNA similarity (%)	Patristic distance	Average amino acid identity (%)	1st codon position similarity (%)	2nd codon position similarity (%)	3rd codon position similarity (%)
Ahrensia marina LZD062	Ahrensia kielensis DSM_5890	97.6557	0.1119	87.43	92.4715	95.8294	58.6057
Albimonas pacifica CGMCC_1.11030	Albimonas donghaensis DSM_17890	94.0621	0.3587	72.56	88.283	90.1634	71.877
Aliiroseovarius crassostreae CV919-312	Aliiroseovarius halocynthiae MA1_10_1	96.3489	0.291	75.46	89.857	93.0592	56.5493
Aliiroseovarius crassostreae CV919-312	Aliiroseovarius pelagivivens CECT_8811	96.0189	0.2938	75.55	89.7539	92.9428	57.4764
Aliiroseovarius crassostreae CV919-312	Aliiroseovarius sediminilitoris DSM_29439	96.6937	0.3196	75.06	88.5677	92.1998	56.1717
Aliiroseovarius pelagivivens CECT_8811	Aliiroseovarius halocynthiae MA1_10_1	96.6193	0.1006	88.66	94.4965	96.9608	67.5609
Aliiroseovarius sediminilitoris DSM_29439	Aliiroseovarius halocynthiae MA1_10_1	96.6892	0.2531	78.13	89.9018	93.6347	57.2109
Aliiroseovarius sediminilitoris DSM_29439	Aliiroseovarius pelagivivens CECT_8811	95.8867	0.256	78.69	90.1026	93.7018	57.9743
Cognatiyoonia sediminum DSM_28715	Cognatiyoonia koreensis DSM_17925	94.7297	0.3451	73.01	85.9319	90.7414	47.6345
Donghicola eburneus DSM_29127	Donghicola tyrosinivorans DSM_100212	95.5466	0.1941	77.42	91.4435	94.2891	63.56
Haematobacter massiliensis CCUG_47968	Haematobacter missouriensis H1892	99.928	0.0559	92.68	96.9199	97.971	76.5605
Halocynthiibacter arcticus PAMC_20958	Halocynthiibacter namhaensis RA2-3	96.5564	0.6209	65.82	77.998	83.773	43.6956
Jannaschia aquimarina GSW-M26	Jannaschia donghaensis CECT_7802	93.3063	0.5482	70.47	84.48	87.7942	56.9448
Jannaschia aquimarina GSW-M26	Jannaschia faecimaris DSM_100420	93.8472	0.5301	70.63	84.625	88.0468	54.5194
Jannaschia aquimarina GSW-M26	Jannaschia helgolandensis DSM_14858	94.9831	0.5107	70.43	84.6102	87.8269	55.1454
Jannaschia aquimarina GSW-M26	Jannaschia pohangensis DSM_19073	94.6295	0.4644	70.26	85.6776	88.3634	58.3864
Jannaschia aquimarina GSW-M26	Jannaschia rubra CECT_5088	94.4482	0.53	70.59	85.3091	87.8995	59.168
Jannaschia aquimarina GSW-M26	Jannaschia seohaensis DSM_25227	95.5782	0.4462	71.01	86.2278	88.7735	61.2737
Jannaschia donghaensis CECT_7802	Jannaschia faecimaris DSM_100420	98.0991	0.1774	83.14	91.2593	94.2549	61.4759
Jannaschia helgolandensis DSM_14858	Jannaschia donghaensis CECT_7802	96.3439	0.2728	78.7	89.026	92.1342	60.705
Jannaschia helgolandensis DSM_14858	Jannaschia faecimaris DSM_100420	97.9012	0.2548	78.82	89.7435	92.977	58.2362
Jannaschia pohangensis DSM_19073	Jannaschia donghaensis CECT_7802	96.4841	0.3546	76.9	88.6663	91.6311	62.0584
Jannaschia pohangensis DSM_19073	Jannaschia faecimaris DSM_100420	96.8898	0.3365	77.13	88.8825	91.9937	59.6832
Jannaschia pohangensis DSM_19073	Jannaschia helgolandensis DSM_14858	97.6271	0.3172	77.39	88.9008	91.8635	60.2138
Jannaschia pohangensis DSM_19073	Jannaschia rubra CECT_5088	97.021	0.3364	75.77	88.9679	91.3325	63.1369
Jannaschia rubra CECT_5088	Jannaschia donghaensis CECT_7802	95.9377	0.3597	76.02	87.9822	91.0246	61.4575
Jannaschia rubra CECT_5088	Jannaschia faecimaris DSM_100420	96.9533	0.3417	76.01	88.2346	91.3333	58.3458
Jannaschia rubra CECT_5088	Jannaschia helgolandensis DSM_14858	97.8983	0.3223	77.1	88.8329	91.8665	59.9897
Jannaschia seohaensis DSM_25227	Jannaschia donghaensis CECT_7802	94.6586	0.4499	72.8	86.5347	89.6218	59.866
Jannaschia seohaensis DSM_25227	Jannaschia faecimaris DSM_100420	95.0642	0.4318	72.52	86.9472	90.0719	57.3143
Jannaschia seohaensis DSM_25227	Jannaschia helgolandensis DSM_14858	95.4607	0.4124	72.93	86.7304	89.8914	57.7379
Jannaschia seohaensis DSM_25227	Jannaschia pohangensis DSM_19073	96.3315	0.3661	73.03	87.7811	90.3062	61.9006
Jannaschia seohaensis DSM_25227	Jannaschia rubra CECT_5088	95.9405	0.4317	72.58	87.2761	89.6962	62.325
Leisingera aquaemixtae CECT_8399	Leisingera daeponensis DSM_23529	97.9675	0.0366	96.15	98.1116	98.7261	87.6224
Leisingera aquimarina DSM_24565	Leisingera aquaemixtae CECT_8399	96.8136	0.131	88.03	94.7785	96.2975	72.7515
Leisingera aquimarina DSM_24565	Leisingera caerulea DSM_24564	96.5564	0.123	88.14	94.6822	96.3921	72.53
Leisingera aquimarina DSM_24565	Leisingera daeponensis DSM_23529	96.4746	0.1301	87.67	94.8006	96.3409	72.6613
Leisingera aquimarina DSM_24565	Leisingera methylohalidivorans DSM_14336	97.9702	0.084	91.63	95.7266	96.9018	76.2987
Leisingera caerulea DSM_24564	Leisingera aquaemixtae CECT_8399	97.6287	0.065	93.52	96.9577	97.9131	80.9863
Leisingera caerulea DSM_24564	Leisingera daeponensis DSM_23529	97.027	0.0641	93.42	96.8944	97.8764	80.7489
Leisingera methylohalidivorans DSM_14336	Leisingera aquaemixtae CECT_8399	97.023	0.15	87.55	94.2773	95.777	72.974
Leisingera methylohalidivorans DSM_14336	Leisingera caerulea DSM_24564	96.1538	0.142	87.5	94.1009	95.7355	72.379
Leisingera methylohalidivorans DSM_14336	Leisingera daeponensis DSM_23529	97.1506	0.1491	87.32	94.4232	95.9357	73.0445
Limimaricola cinnabarinus LL-001	Limimaricola soesokkakensis CECT_8367	98.3662	0.1268	86.99	87.955	89.4428	70.7019
Limimaricola hongkongensis DSM_17492	Limimaricola cinnabarinus LL-001	98.6385	0.1566	86.4	87.5755	88.9534	71.1245
Limimaricola hongkongensis DSM_17492	Limimaricola soesokkakensis CECT_8367	98.7747	0.1335	87.8	94.3277	95.6071	77.5221
Limimaricola pyoseonensis DSM_21424	Limimaricola cinnabarinus LL-001	95.9156	0.2213	81	85.8736	87.6271	69.4388
Limimaricola pyoseonensis DSM_21424	Limimaricola hongkongensis DSM_17492	95.7794	0.1717	82.71	93.4652	94.8287	78.309
Limimaricola pyoseonensis DSM_21424	Limimaricola soesokkakensis CECT_8367	96.3921	0.1981	82.23	92.9376	94.4037	77.175
Litoreibacter albidus DSM_26922	Litoreibacter ascidiaceicola DSM_100566	98.8482	0.1368	84.89	92.9606	96.5143	60.8846
Litoreibacter albidus DSM_26922	Litoreibacter halocynthiae MA1-10_1	97.8969	0.1402	84.81	92.5949	96.1839	60.0651
Litoreibacter albidus DSM_26922	Litoreibacter meonggei DSM_29466	96.3563	0.1361	84.75	92.7668	96.3128	60.4541
Litoreibacter arenae DSM_19593	Litoreibacter albidus DSM_26922	95.6051	0.1728	83.04	91.9401	95.4738	60.1298
Litoreibacter arenae DSM_19593	Litoreibacter ascidiaceicola DSM_100566	95.5466	0.154	86.42	93.3102	96.4165	65.3161
Litoreibacter arenae DSM_19593	Litoreibacter halocynthiae MA1-10_1	96.4912	0.1573	86.67	93.4317	96.4269	65.552
Litoreibacter arenae DSM_19593	Litoreibacter janthinus DSM_26921	95.5962	0.1345	85.07	92.6641	95.855	59.2559
Litoreibacter arenae DSM_19593	Litoreibacter meonggei DSM_29466	96.8179	0.1533	85.55	92.7814	95.893	63.7199
Litoreibacter ascidiaceicola DSM_100566	Litoreibacter halocynthiae MA1-10_1	98.3707	0.0339	96.06	97.385	98.7579	82.2394
Litoreibacter janthinus DSM_26921	Litoreibacter albidus DSM_26922	97.7011	0.1513	83.86	92.2985	96.0796	57.9238
Litoreibacter janthinus DSM_26921	Litoreibacter ascidiaceicola DSM_100566	96.8329	0.1325	86.42	93.2289	96.5333	60.5438
Litoreibacter janthinus DSM_26921	Litoreibacter halocynthiae MA1-10_1	95.614	0.1359	86.44	92.7973	96.1641	59.7707
Litoreibacter janthinus DSM_26921	Litoreibacter meonggei DSM_29466	96.6171	0.1318	86.32	92.7069	96.1014	59.4312
Litoreibacter meonggei DSM_29466	Litoreibacter ascidiaceicola DSM_100566	97.1622	0.0783	89.82	94.81	97.5657	69.7439
Litoreibacter meonggei DSM_29466	Litoreibacter halocynthiae MA1-10_1	97.2973	0.0817	89.44	94.9008	97.6962	68.8633
Litoreibacter ponti DSM_100977	Litoreibacter albidus DSM_26922	96.6937	0.2858	77.19	89.566	93.3767	56.2386
Litoreibacter ponti DSM_100977	Litoreibacter arenae DSM_19593	94.5233	0.2274	78.25	90.4697	93.5892	60.6804
Litoreibacter ponti DSM_100977	Litoreibacter ascidiaceicola DSM_100566	96.6937	0.267	77.97	89.7572	93.4915	57.5167
Litoreibacter ponti DSM_100977	Litoreibacter halocynthiae MA1-10_1	95.473	0.2704	78.02	89.6477	93.3136	57.0913
Litoreibacter ponti DSM_100977	Litoreibacter janthinus DSM_26921	98.1682	0.2475	78.42	89.6857	93.6212	55.0518
Litoreibacter ponti DSM_100977	Litoreibacter meonggei DSM_29466	97.2203	0.2663	77.88	89.4382	93.1927	57.0385
Loktanella fryxellensis DSM_16213	Loktanella atrilutea DSM_29326	97.8926	0.2316	79.66	91.356	93.0741	67.3086
Loktanella fryxellensis DSM_16213	Loktanella salsilacus DSM_16199	97.4932	0.2296	78.87	90.7509	93.1346	60.6215
Loktanella salsilacus DSM_16199	Loktanella atrilutea DSM_29326	97.6255	0.1698	82	91.9151	94.2693	60.6083
Marivita geojedonensis DPG-138	Marivita cryptomonadis CL-SK44	98.2325	0.1252	86.59	93.6355	96.1193	62.8123
Marivita hallyeonensis DSM_29431	Marivita cryptomonadis CL-SK44	98.1645	0.1886	81.13	91.5394	94.7524	57.5898
Marivita hallyeonensis DSM_29431	Marivita geojedonensis DPG-138	97.9606	0.1666	81.94	92.4542	95.162	58.8764
Nioella nitratireducens SSW136	Nioella sediminis JS7-11	97.4307	0.2086	81.07	90.8881	93.3943	65.3086
Octadecabacter antarcticus 307	Octadecabacter ascidiaceicola CECT_8868	98.0312	0.24	80.64	89.4828	93.4635	54.341
Octadecabacter antarcticus 307	Octadecabacter temperatus SB1	98.3707	0.2357	80.63	89.5683	93.5078	54.0804
Octadecabacter arcticus 238	Octadecabacter antarcticus 307	98.1119	0.0973	88.14	94.2649	96.4454	68.3944
Octadecabacter arcticus 238	Octadecabacter ascidiaceicola CECT_8868	96.7633	0.2367	81.21	89.4483	93.4281	54.7022
Octadecabacter arcticus 238	Octadecabacter temperatus SB1	96.8307	0.2323	81.27	89.5624	93.5023	54.5144
Octadecabacter temperatus SB1	Octadecabacter ascidiaceicola CECT_8868	98.7101	0.0757	89.43	95.1535	97.4578	66.8957
Pacificibacter maritimus DSM_104731	Pacificibacter marinus DSM_25228	99.458	0.1681	80.17	91.4298	95.5754	58.3529
Palleronia abyssalis CECT_8504	Palleronia marisminoris CECT_7066	95.9405	0.2964	76.39	89.2055	92.1394	63.6953
Pararhodobacter marinus CIC4N-9	Pararhodobacter aggregans D1-19	95.8895	0.2483	78.93	90.495	92.4136	69.3876
Phaeobacter gallaeciensis DSM_26640	Phaeobacter inhibens DSM_16374	99.7279	0.0409	94.74	97.0951	98.2624	76.779
Phaeobacter italicus CECT_7645	Phaeobacter gallaeciensis DSM_26640	96.8729	0.147	84.76	93.7227	95.8371	62.8526
Phaeobacter italicus CECT_7645	Phaeobacter inhibens DSM_16374	96.8729	0.1388	84.45	93.609	95.5893	62.919
Phaeobacter italicus CECT_7645	Phaeobacter porticola strain_P97	96.2111	0.1561	84.01	92.8968	95.3345	60.9591
Phaeobacter porticola strain_P97	Phaeobacter gallaeciensis DSM_26640	98.2409	0.0887	89.85	95.0941	96.943	67.3832
Phaeobacter porticola strain_P97	Phaeobacter inhibens DSM_16374	98.2409	0.0806	90.7	95.5395	97.1699	71.1669
Planktotalea frisia SH6-1	Planktotalea arctica IMCC9565	96.5772	0.1773	81.49	91.2284	95.064	55.0809
Poseidonocella pacifica DSM_29316	Poseidonocella sedimentorum KMM_9023	95.9322	0.3486	73.31	87.6833	90.4745	55.4976
Pseudophaeobacter leonis 306	Pseudophaeobacter arcticus DSM_23566	97.0907	0.1829	83.4	82.4067	84.4179	58.4502
Puniceibacterium antarcticum SM1211	Puniceibacterium sediminis DSM_29052	97.3613	0.1345	84.33	93.3818	95.4087	66.0535
Rhodovulum imhoffii DSM_18064	Rhodovulum kholense DSM_19783	94.6622	0.4517	72.52	87.1265	89.9925	57.4103
Rhodovulum imhoffii DSM_18064	Rhodovulum robiginosum DSM_12329	96.2188	0.4282	75.15	87.4384	90.235	57.9965
Rhodovulum imhoffii DSM_18064	Rhodovulum sulfidophilum DSM_1374	94.9324	0.4764	72.46	86.4533	89.4472	56.9664
Rhodovulum imhoffii DSM_18064	Rhodovulum viride JA756	95.1286	0.4532	72.66	87.1199	89.9579	57.377
Rhodovulum kholense DSM_19783	Rhodovulum viride JA756	99.3902	0.0152	98.66	99.0587	99.2653	95.7857
Rhodovulum robiginosum DSM_12329	Rhodovulum kholense DSM_19783	96.0758	0.3437	74.58	88.8941	91.1331	66.9668
Rhodovulum robiginosum DSM_12329	Rhodovulum sulfidophilum DSM_1374	95.8728	0.3684	74.5	88.2563	90.444	66.644
Rhodovulum robiginosum DSM_12329	Rhodovulum viride JA756	95.6111	0.3452	74.78	88.8789	91.1039	66.9966
Rhodovulum sulfidophilum DSM_1374	Rhodovulum kholense DSM_19783	99.0496	0.1244	88	95.248	96.3424	80.1268
Rhodovulum sulfidophilum DSM_1374	Rhodovulum viride JA756	98.8482	0.1259	87.97	95.1815	96.2581	80.1136
Roseibaca ekhonensis CECT_7235	Roseibaca calidilacus HL-91	98.2993	0.1325	85.94	93.0724	95.7872	66.2707
Roseobacter litoralis Och_149	Roseobacter denitrificans OCh_114_DSM_7001	98.7075	0.0907	92.44	95.1654	97.1594	70.5789
Shimia abyssi DSM_100673	Shimia haliotis DSM_28453	95.3252	0.3369	74.8	88.0949	91.9076	52.9342
Shimia abyssi DSM_100673	Shimia isoporae SW6_1	94.8649	0.3391	74.31	88.154	92.1878	50.2375
Shimia abyssi DSM_100673	Shimia marina CECT_7688	95.8588	0.3541	74.55	88.0805	91.7717	52.1387
Shimia abyssi DSM_100673	Shimia sagamensis JAMH011_1	96.4698	0.3508	73.82	87.8269	91.9603	51.5974
Shimia aestuarii DSM_15283	Shimia abyssi DSM_100673	98.5034	0.2221	78.99	90.3723	93.7571	55.909
Shimia aestuarii DSM_15283	Shimia haliotis DSM_28453	95.5962	0.2962	76.24	89.7933	93.0491	56.7349
Shimia aestuarii DSM_15283	Shimia isoporae SW6_1	95.473	0.2985	76.23	88.8405	92.3282	53.0064
Shimia aestuarii DSM_15283	Shimia marina CECT_7688	96.1303	0.3134	75.89	89.0151	91.8955	54.8616
Shimia aestuarii DSM_15283	Shimia sagamensis JAMH011_1	96.1982	0.3101	75.3	88.7079	92.4344	53.3456
Shimia haliotis DSM_28453	Shimia marina CECT_7688	96.2813	0.2444	77.08	89.8748	92.9228	57.0585
Shimia haliotis DSM_28453	Shimia sagamensis JAMH011_1	96.6193	0.241	76.97	90.3372	94.0174	57.2466
Shimia isoporae SW6_1	Shimia haliotis DSM_28453	97.6287	0.1192	85.57	93.1289	96.0915	58.5607
Shimia isoporae SW6_1	Shimia marina CECT_7688	96.4794	0.2466	76.58	90.0012	93.2752	53.5867
Shimia isoporae SW6_1	Shimia sagamensis JAMH011_1	95.8136	0.2433	76.42	89.8042	93.6597	53.3888
Shimia marina CECT_7688	Shimia sagamensis JAMH011_1	97.4185	0.187	80.62	91.1419	94.3877	59.6485
Thioclava arenosa CAU_1312	Thioclava atlantica 13D2W-2	96.3439	0.3761	73.92	88.0691	90.4524	65.5309
Thioclava arenosa CAU_1312	Thioclava dalianensis strain_DLFJ1-1	94.8614	0.425	72.44	86.7153	89.4882	61.1416
Thioclava arenosa CAU_1312	Thioclava electrotropha Elox9	95.8023	0.4017	73.15	87.6982	90.0887	64.8117
Thioclava arenosa CAU_1312	Thioclava indica strain_DT23-4	94.6694	0.3944	73.13	86.9454	90.3343	59.0873
Thioclava arenosa CAU_1312	Thioclava marina 11-10-0-13	96.1408	0.3815	74.49	88.4454	90.5437	65.4272
Thioclava arenosa CAU_1312	Thioclava nitratireducens 25B10_4	95.6081	0.3954	73.29	87.7708	90.1639	64.216
Thioclava arenosa CAU_1312	Thioclava pacifica DSM_10166	95.8108	0.3746	74.55	88.8421	90.9696	65.5099
Thioclava arenosa CAU_1312	Thioclava sediminum TAW-CT134	95.4054	0.3974	73.16	87.3826	89.769	64.6547
Thioclava atlantica 13D2W-2	Thioclava electrotropha Elox9	98.4438	0.1916	82.53	93.0271	94.819	71.4492
Thioclava atlantica 13D2W-2	Thioclava marina 11-10-0-13	97.9026	0.1714	84.29	93.8044	95.3721	72.7818
Thioclava atlantica 13D2W-2	Thioclava nitratireducens 25B10_4	98.4438	0.1853	82.35	93.1818	95.0007	70.9173
Thioclava atlantica 13D2W-2	Thioclava pacifica DSM_10166	97.8349	0.1646	84.34	93.8657	95.5105	72.366
Thioclava atlantica 13D2W-2	Thioclava sediminum TAW-CT134	98.3762	0.1874	82.59	92.7697	94.5871	71.4164
Thioclava dalianensis strain_DLFJ1-1	Thioclava atlantica 13D2W-2	97.7657	0.2818	79.06	91.1534	93.4996	65.5866
Thioclava dalianensis strain_DLFJ1-1	Thioclava electrotropha Elox9	98.1081	0.3074	78.26	90.3274	92.7562	64.2687
Thioclava dalianensis strain_DLFJ1-1	Thioclava marina 11-10-0-13	96.7568	0.2872	78.07	90.4301	92.9375	63.8415
Thioclava dalianensis strain_DLFJ1-1	Thioclava nitratireducens 25B10_4	97.8378	0.3011	78.51	90.482	92.9374	63.4011
Thioclava dalianensis strain_DLFJ1-1	Thioclava pacifica DSM_10166	96.8243	0.2803	78.67	90.6251	93.1149	64.1286
Thioclava dalianensis strain_DLFJ1-1	Thioclava sediminum TAW-CT134	98.0405	0.3032	78.06	90.0879	92.5406	64.0511
Thioclava indica strain_DT23-4	Thioclava atlantica 13D2W-2	96.561	0.2512	79.23	90.6326	93.5919	61.0597
Thioclava indica strain_DT23-4	Thioclava dalianensis strain_DLFJ1-1	97.8422	0.193	80.46	91.5202	94.3039	63.5452
Thioclava indica strain_DT23-4	Thioclava electrotropha Elox9	96.7611	0.2768	78.79	90.6212	93.4061	61.3252
Thioclava indica strain_DT23-4	Thioclava marina 11-10-0-13	95.5466	0.2566	80.02	90.8779	93.6916	61.0322
Thioclava indica strain_DT23-4	Thioclava nitratireducens 25B10_4	95.8277	0.2705	79.1	90.7502	93.5826	60.4627
Thioclava indica strain_DT23-4	Thioclava pacifica DSM_10166	95.0875	0.2497	80.33	91.0689	93.8127	61.3499
Thioclava indica strain_DT23-4	Thioclava sediminum TAW-CT134	96.1642	0.2725	78.87	90.4103	93.2024	61.1481
Thioclava marina 11-10-0-13	Thioclava electrotropha Elox9	98.2373	0.1553	84.44	93.8597	95.393	72.9851
Thioclava marina 11-10-0-13	Thioclava nitratireducens 25B10_4	97.6367	0.149	84.18	93.9214	95.5259	71.946
Thioclava marina 11-10-0-13	Thioclava pacifica DSM_10166	98.9196	0.0547	93.95	97.0535	97.8317	80.566
Thioclava marina 11-10-0-13	Thioclava sediminum TAW-CT134	97.4342	0.1511	84.6	93.5494	95.1132	72.6712
Thioclava nitratireducens 25B10_4	Thioclava electrotropha Elox9	98.7846	0.0416	94.34	97.4221	98.1694	83.7245
Thioclava nitratireducens 25B10_4	Thioclava sediminum TAW-CT134	99.661	0.0374	94.4	97.1441	97.8745	83.5824
Thioclava pacifica DSM_10166	Thioclava electrotropha Elox9	97.5017	0.1484	84.28	94.3125	95.8522	73.2414
Thioclava pacifica DSM_10166	Thioclava nitratireducens 25B10_4	98.5085	0.1422	84.33	94.3234	95.8922	72.1997
Thioclava pacifica DSM_10166	Thioclava sediminum TAW-CT134	98.3051	0.1442	84.56	93.9749	95.5367	73.1277
Thioclava sediminum TAW-CT134	Thioclava electrotropha Elox9	99.1222	0.0156	98.11	97.8721	98.2365	90.5427
Wenxinia saemankumensis DSM_100565	Wenxinia marina DSM_24838	98.1658	0.3775	73.1	87.7583	89.1412	70.5062
Yoonia litorea DSM_29433	Yoonia maricola DSM_29128	95.5962	0.2527	78.59	90.1454	93.8366	51.8169
Yoonia litorea DSM_29433	Yoonia rosea DSM_29591	96.1356	0.2406	78.82	89.9941	93.2757	53.5207
Yoonia maritima DSM_101533	Yoonia litorea DSM_29433	96.0678	0.3447	74.58	87.7505	92.0631	48.6252
Yoonia maritima DSM_101533	Yoonia maricola DSM_29128	98.0965	0.3111	75.64	88.8905	93.0352	50.1158
Yoonia maritima DSM_101533	Yoonia rosea DSM_29591	98.0272	0.299	75.98	89.4097	93.2053	51.4395
Yoonia maritima DSM_101533	Yoonia tamlensis DSM_26879	97.9675	0.1376	82.7	92.8961	96.1711	57.0023
Yoonia maritima DSM_101533	Yoonia vestfoldensis DSM_16212	95.1286	0.3369	74.65	88.237	92.2224	49.1755
Yoonia rosea DSM_29591	Yoonia maricola DSM_29128	98.5044	0.1531	83.74	92.3588	95.3819	57.8269
Yoonia sediminilitoris DSM_29955	Yoonia litorea DSM_29433	96.0625	0.3102	74.72	88.4937	92.4343	51.1779
Yoonia sediminilitoris DSM_29955	Yoonia maricola DSM_29128	97.8246	0.2766	76.48	89.706	93.695	53.5056
Yoonia sediminilitoris DSM_29955	Yoonia maritima DSM_101533	98.3673	0.2788	75.52	89.3195	93.5198	49.8239
Yoonia sediminilitoris DSM_29955	Yoonia rosea DSM_29591	98.1633	0.2645	77.12	90.3291	93.7872	54.56
Yoonia sediminilitoris DSM_29955	Yoonia tamlensis DSM_26879	97.561	0.2967	74.99	89.0231	93.0394	54.1877
Yoonia sediminilitoris DSM_29955	Yoonia vestfoldensis DSM_16212	94.9932	0.3024	74.57	88.9102	92.5202	55.673
Yoonia tamlensis DSM_26879	Yoonia litorea DSM_29433	96.0081	0.3625	74.06	87.8298	91.7712	51.0234
Yoonia tamlensis DSM_26879	Yoonia maricola DSM_29128	97.4237	0.3289	75.84	88.8275	92.7257	52.851
Yoonia tamlensis DSM_26879	Yoonia rosea DSM_29591	97.29	0.3169	76.03	89.4964	93.0454	55.1971
Yoonia tamlensis DSM_26879	Yoonia vestfoldensis DSM_16212	95.3961	0.3548	74.97	88.3874	91.8995	56.1466
Yoonia vestfoldensis DSM_16212	Yoonia litorea DSM_29433	94.5233	0.3355	74.75	87.9565	91.4742	52.8118
Yoonia vestfoldensis DSM_16212	Yoonia maricola DSM_29128	94.7226	0.3019	75.47	88.4907	92.2322	53.5975
Yoonia vestfoldensis DSM_16212	Yoonia rosea DSM_29591	94.5196	0.2899	76.17	89.5363	92.5461	56.4104

## Sheet: Between genera
Query	Subject	16S rRNA similarity (%)	Patristic distance	Average amino acid identity (%)	1st codon position similarity (%)	2nd codon position similarity (%)	3rd codon position similarity (%)
Acuticoccus yangtzensis JL1095	Ahrensia kielensis DSM_5890	88.7258	1.4495	54.87	69.444	76.086	32.9474
Acuticoccus yangtzensis JL1095	Ahrensia marina LZD062	88.8592	1.4424	55.2	69.6952	75.9929	36.2927
Acuticoccus yangtzensis JL1095	Cereibacter changlensis DSM_18774	87.8397	2.0847	53.42	68.9459	73.9122	54.6395
Acuticoccus yangtzensis JL1095	Jannaschia donghaensis CECT_7802	86.7568	2.2863	52.7	67.6972	73.3687	49.2668
Acuticoccus yangtzensis JL1095	Jannaschia faecimaris DSM_100420	86.5541	2.2683	52.92	67.8655	73.6607	47.4558
Acuticoccus yangtzensis JL1095	Jannaschia helgolandensis DSM_14858	86.9771	2.2489	53.29	67.6841	73.3354	47.0785
Acuticoccus yangtzensis JL1095	Leisingera aquaemixtae CECT_8399	87.4239	2.3033	52.88	68.6687	73.6131	51.6038
Acuticoccus yangtzensis JL1095	Leisingera aquimarina DSM_24565	87.247	2.2979	52.55	68.097	73.4127	48.3843
Acuticoccus yangtzensis JL1095	Leisingera caerulea DSM_24564	87.9837	2.2953	52.69	68.3561	73.414	50.9071
Acuticoccus yangtzensis JL1095	Leisingera daeponensis DSM_23529	87.0533	2.3024	52.8	68.683	73.6285	51.7479
Acuticoccus yangtzensis JL1095	Leisingera methylohalidivorans DSM_14336	87.7441	2.3169	52.8	68.4511	73.7224	48.8238
Acuticoccus yangtzensis JL1095	Paenirhodobacter enshiensis DW2-9	87.0021	2.2864	52.48	68.4729	73.4679	53.1077
Acuticoccus yangtzensis JL1095	Palleronia abyssalis CECT_8504	87.8808	2.2826	53.59	67.9755	73.1448	49.5887
Acuticoccus yangtzensis JL1095	Palleronia marisminoris CECT_7066	87.247	2.28	54.05	68.5351	73.4192	52.9922
Acuticoccus yangtzensis JL1095	Phaeobacter gallaeciensis DSM_26640	88.1001	2.3146	52.35	68.0694	73.5829	44.8267
Acuticoccus yangtzensis JL1095	Phaeobacter inhibens DSM_16374	87.8296	2.3065	52.42	68.1816	73.6231	44.7997
Acuticoccus yangtzensis JL1095	Phaeobacter italicus CECT_7645	87.4831	2.2959	52.83	68.4795	73.6931	45.4694
Acuticoccus yangtzensis JL1095	Phaeobacter porticola strain_P97	87.138	2.3238	52.47	67.8955	73.4496	42.9569
Acuticoccus yangtzensis JL1095	Tabrizicola aquatica RCRI19	87.4069	2.2126	53.19	68.1056	73.3185	50.8752
Acuticoccus yangtzensis JL1095	Thioclava arenosa CAU_1312	87.5507	2.1756	53.24	68.578	73.457	51.1595
Acuticoccus yangtzensis JL1095	Thioclava atlantica 13D2W-2	88.2512	2.2447	52.88	68.9678	73.9053	52.3692
Acuticoccus yangtzensis JL1095	Thioclava dalianensis strain_DLFJ1-1	87.323	2.2936	52.55	68.1198	73.3333	47.5731
Acuticoccus yangtzensis JL1095	Thioclava electrotropha Elox9	87.973	2.2703	52.6	68.3044	73.5472	51.1965
Acuticoccus yangtzensis JL1095	Thioclava indica strain_DT23-4	87.7868	2.263	52.4	67.9263	73.489	45.0546
Acuticoccus yangtzensis JL1095	Thioclava marina 11-10-0-13	87.6351	2.2501	52.5	68.5965	73.705	51.0676
Acuticoccus yangtzensis JL1095	Thioclava nitratireducens 25B10_4	87.7358	2.264	52.92	68.3919	73.6826	51.2184
Acuticoccus yangtzensis JL1095	Thioclava pacifica DSM_10166	87.4074	2.2432	52.57	68.6707	73.8623	50.8301
Acuticoccus yangtzensis JL1095	Thioclava sediminum TAW-CT134	87.6685	2.2661	52.65	68.1771	73.4318	51.2178
Acuticoccus yangtzensis JL1095	Yoonia maricola DSM_29128	88.0325	2.2701	52.62	66.9197	73.0356	40.1074
Acuticoccus yangtzensis JL1095	Yoonia rosea DSM_29591	87.6268	2.258	52.83	67.4447	73.2302	42.1103
Aestuariivita boseongensis BS-B2	Acuticoccus yangtzensis JL1095	87.4652	2.1043	53.04	68.5756	73.8629	46.5405
Aestuariivita boseongensis BS-B2	Ahrensia kielensis DSM_5890	85.411	2.0971	53.79	66.9741	74.3639	35.1222
Aestuariivita boseongensis BS-B2	Ahrensia marina LZD062	85.2055	2.09	54.14	67.2316	74.2635	37.4041
Aestuariivita boseongensis BS-B2	Albimonas donghaensis DSM_17890	87.9083	1.1907	59.63	76.9575	80.6952	52.5778
Aestuariivita boseongensis BS-B2	Albimonas pacifica CGMCC_1.11030	89.415	1.1866	59.28	76.654	80.4675	52.0761
Aestuariivita boseongensis BS-B2	Aliiroseovarius crassostreae CV919-312	93.1154	0.6968	66.99	83.5869	87.5513	53.2823
Aestuariivita boseongensis BS-B2	Aliiroseovarius halocynthiae MA1_10_1	93.0459	0.707	67.18	83.5775	87.6469	52.0365
Aestuariivita boseongensis BS-B2	Aliiroseovarius pelagivivens CECT_8811	93.3333	0.7099	67.03	83.559	87.5875	52.5993
Aestuariivita boseongensis BS-B2	Aliiroseovarius sediminilitoris DSM_29439	93.6585	0.7357	67.18	83.4214	87.5393	52.8804
Aestuariivita boseongensis BS-B2	Amylibacter kogurei strain_4G11	91.8637	1.0142	62.59	76.6103	83.723	42.4305
Aestuariivita boseongensis BS-B2	Aquimixticola soesokkakensis CECT_8620	91.6551	0.7273	65.18	82.403	86.4774	52.6218
Aestuariivita boseongensis BS-B2	Ascidiaceihabitans donghaensis CECT_8599	92.4948	0.5404	69.98	84.1955	89.2184	49.4866
Aestuariivita boseongensis BS-B2	Boseongicola aestuarii CECT_8489	93.1106	0.7878	66.36	82.9925	87.461	50.1846
Aestuariivita boseongensis BS-B2	Brevirhabdus pacifica 22DY15	92.8771	0.7775	67.9	82.6921	86.0101	55.4946
Aestuariivita boseongensis BS-B2	Cereibacter changlensis DSM_18774	90.9471	0.842	65.47	82.6959	85.9212	55.9655
Aestuariivita boseongensis BS-B2	Cognatishimia maritima DSM_28223	95.2547	0.5388	68.74	84.7311	88.9084	50.8551
Aestuariivita boseongensis BS-B2	Cognatiyoonia koreensis DSM_17925	92.42	0.738	67.35	83.1409	87.3865	49.3442
Aestuariivita boseongensis BS-B2	Cognatiyoonia sediminum DSM_28715	93.986	0.7888	67.48	82.8989	87.8656	47.5979
Aestuariivita boseongensis BS-B2	Cribrihabitans marinus DSM_29340	94.2737	0.456	72.11	87.1848	89.8386	59.1274
Aestuariivita boseongensis BS-B2	Dinoroseobacter shibae DFL_12	91.5855	0.7507	67.72	83.8867	87.118	55.2661
Aestuariivita boseongensis BS-B2	Flavimaricola marinus CECT_8899	91.7884	0.684	66.52	83.473	87.1251	52.534
Aestuariivita boseongensis BS-B2	Haematobacter massiliensis CCUG_47968	90.8441	0.866	63.92	81.6259	85.3981	51.5048
Aestuariivita boseongensis BS-B2	Haematobacter missouriensis H1892	90.9722	0.865	63.86	81.3771	85.1621	51.0365
Aestuariivita boseongensis BS-B2	Halocynthiibacter arcticus PAMC_20958	91.8226	0.779	65.34	78.7019	83.8964	43.1342
Aestuariivita boseongensis BS-B2	Halocynthiibacter namhaensis RA2-3	92.4411	0.7574	65.75	80.8949	86.1619	45.1881
Aestuariivita boseongensis BS-B2	Hasllibacter halocynthiae DSM_29318	92.7476	1.0509	63.7	79.4368	82.7097	50.8833
Aestuariivita boseongensis BS-B2	Hwanghaeicola aestuarii DSM_22009	90.3297	0.8682	64.64	82.5103	85.8154	51.1456
Aestuariivita boseongensis BS-B2	Jannaschia aquimarina GSW-M26	91.9972	0.9015	64.3	81.5076	85.124	52.3087
Aestuariivita boseongensis BS-B2	Jannaschia donghaensis CECT_7802	93.5844	0.9812	64.68	81.2102	85.3168	53.3286
Aestuariivita boseongensis BS-B2	Jannaschia faecimaris DSM_100420	92.9568	0.9632	64.72	81.3063	85.6065	51.2294
Aestuariivita boseongensis BS-B2	Jannaschia helgolandensis DSM_14858	92.8273	0.9438	64.56	81.2978	85.3132	52.4131
Aestuariivita boseongensis BS-B2	Jannaschia pohangensis DSM_19073	93.389	0.8975	65.18	82.3633	85.9014	54.2481
Aestuariivita boseongensis BS-B2	Jannaschia rubra CECT_5088	93.101	0.9631	64.65	81.8023	85.1917	53.5863
Aestuariivita boseongensis BS-B2	Jannaschia seohaensis DSM_25227	92.2756	0.8793	64.91	82.2546	85.5744	54.5196
Aestuariivita boseongensis BS-B2	Jhaorihella thermophila DSM_23413	90.9916	0.4871	71.39	86.342	89.6002	58.6104
Aestuariivita boseongensis BS-B2	Kandeliimicrobium roseum XY-R6	91.0427	0.7957	66.99	83.6128	86.717	55.6124
Aestuariivita boseongensis BS-B2	Leisingera aquaemixtae CECT_8399	93.3241	0.5887	70.75	87.277	90.2916	58.8486
Aestuariivita boseongensis BS-B2	Leisingera aquimarina DSM_24565	93.737	0.5832	70.41	86.5992	90.0782	57.1163
Aestuariivita boseongensis BS-B2	Leisingera caerulea DSM_24564	93.9246	0.5807	70.71	86.9826	90.1747	58.1119
Aestuariivita boseongensis BS-B2	Leisingera daeponensis DSM_23529	93.2498	0.5877	70.92	87.4581	90.474	58.837
Aestuariivita boseongensis BS-B2	Leisingera methylohalidivorans DSM_14336	93.4722	0.6022	70.87	86.3423	89.6185	57.3707
Aestuariivita boseongensis BS-B2	Limimaricola cinnabarinus LL-001	90.6815	0.8474	66.16	77.3269	80.626	50.9365
Aestuariivita boseongensis BS-B2	Limimaricola hongkongensis DSM_17492	90.8901	0.7978	66.4	83.3767	86.6946	56.2326
Aestuariivita boseongensis BS-B2	Limimaricola pyoseonensis DSM_21424	91.7942	0.7762	65.6	83.9624	87.1135	55.9594
Aestuariivita boseongensis BS-B2	Limimaricola soesokkakensis CECT_8367	90.9597	0.8242	66.07	83.3473	86.6251	54.9621
Aestuariivita boseongensis BS-B2	Litoreibacter albidus DSM_26922	91.8694	0.7648	66.44	82.1873	86.8599	50.3176
Aestuariivita boseongensis BS-B2	Litoreibacter arenae DSM_19593	92.9764	0.7064	67.22	82.8086	87.0186	53.4831
Aestuariivita boseongensis BS-B2	Litoreibacter ascidiaceicola DSM_100566	92.0668	0.746	66.61	82.311	86.8977	51.2969
Aestuariivita boseongensis BS-B2	Litoreibacter halocynthiae MA1-10_1	91.9972	0.7493	66.54	82.2888	86.8717	51.0731
Aestuariivita boseongensis BS-B2	Litoreibacter janthinus DSM_26921	92.2863	0.7265	67.06	82.2146	86.9857	49.5818
Aestuariivita boseongensis BS-B2	Litoreibacter meonggei DSM_29466	92.8273	0.7453	66.78	82.1162	86.8074	50.8706
Aestuariivita boseongensis BS-B2	Litoreibacter ponti DSM_100977	92.8969	0.6892	67.4	83.7368	87.2756	55.126
Aestuariivita boseongensis BS-B2	Loktanella atrilutea DSM_29326	91.0987	0.7825	65.76	83.4249	86.8849	55.0916
Aestuariivita boseongensis BS-B2	Loktanella fryxellensis DSM_16213	90.4861	0.792	65.66	82.2156	85.5643	54.9008
Aestuariivita boseongensis BS-B2	Loktanella salsilacus DSM_16199	90.8838	0.7806	65.66	82.496	86.6008	52.3459
Aestuariivita boseongensis BS-B2	Marinibacterium profundimaris 22II1-22F33	94.0601	0.5134	70	86.1288	89.3248	58.727
Aestuariivita boseongensis BS-B2	Maritimibacter alkaliphilus HTCC2654	92.8423	0.7181	65.85	83.4824	86.937	54.798
Aestuariivita boseongensis BS-B2	Marivivens niveibacter MCCC_1A06712	90.8901	0.7109	66.44	82.469	87.2474	48.9109
Aestuariivita boseongensis BS-B2	Monaibacterium marinum C7	90.612	1.0205	62.07	78.7367	83.4067	48.5488
Aestuariivita boseongensis BS-B2	Neptunicoccus sediminis CY02	92.2863	0.907	63.56	80.5886	85.1079	48.843
Aestuariivita boseongensis BS-B2	Nereida ignava CECT_5292	93.4403	0.7018	67.61	82.2224	87.277	45.0313
Aestuariivita boseongensis BS-B2	Nioella nitratireducens SSW136	94.2321	0.7551	66.9	84.285	87.9981	55.7647
Aestuariivita boseongensis BS-B2	Nioella sediminis JS7-11	94.2281	0.7282	66.96	84.0392	87.3953	56.501
Aestuariivita boseongensis BS-B2	Oceanicella actignis CGMCC_1.10808	89.2707	1.1438	61.13	78.2106	81.888	53.3165
Aestuariivita boseongensis BS-B2	Oceaniglobus indicus 1-19b	91.5797	0.8249	66.46	83.5481	87.1912	55.6833
Aestuariivita boseongensis BS-B2	Oceaniovalibus guishaninsula JLT2003	92.9617	0.907	66.06	80.2949	83.6437	53.9276
Aestuariivita boseongensis BS-B2	Octadecabacter antarcticus 307	94.1463	0.7795	66.59	81.4513	86.1952	47.6672
Aestuariivita boseongensis BS-B2	Octadecabacter arcticus 238	93.5372	0.7761	67	81.4568	86.2229	48.3986
Aestuariivita boseongensis BS-B2	Octadecabacter ascidiaceicola CECT_8868	94.9826	0.7371	67.19	82.5431	87.0202	47.0031
Aestuariivita boseongensis BS-B2	Octadecabacter temperatus SB1	93.6585	0.7327	66.79	82.3655	86.8397	46.276
Aestuariivita boseongensis BS-B2	Pacificibacter marinus DSM_25228	91.3194	0.7743	64.61	80.1265	86.435	44.0096
Aestuariivita boseongensis BS-B2	Pacificibacter maritimus DSM_104731	91.3194	0.7761	64.82	80.026	86.5996	44.064
Aestuariivita boseongensis BS-B2	Paenirhodobacter enshiensis DW2-9	89.8601	1.0437	63.03	80.7846	84.5957	54.3212
Aestuariivita boseongensis BS-B2	Palleronia abyssalis CECT_8504	91.2892	0.9464	64.82	81.7702	85.9331	52.9685
Aestuariivita boseongensis BS-B2	Palleronia marisminoris CECT_7066	91.0926	0.9438	64.38	82.4909	86.2679	54.1137
Aestuariivita boseongensis BS-B2	Pararhodobacter aggregans D1-19	90.271	0.9058	63.26	81.1667	84.607	55.7953
Aestuariivita boseongensis BS-B2	Pararhodobacter marinus CIC4N-9	90.2575	0.8909	63.44	81.0012	84.6063	55.3427
Aestuariivita boseongensis BS-B2	Phaeobacter gallaeciensis DSM_26640	93.4631	0.6	70.82	85.743	89.2619	54.0306
Aestuariivita boseongensis BS-B2	Phaeobacter inhibens DSM_16374	93.185	0.5918	70.67	85.8871	89.3597	54.2903
Aestuariivita boseongensis BS-B2	Phaeobacter italicus CECT_7645	94.0236	0.5813	70.73	85.9052	89.1968	54.3653
Aestuariivita boseongensis BS-B2	Phaeobacter porticola strain_P97	93.4631	0.6091	71.03	85.4015	89.1944	53.0845
Aestuariivita boseongensis BS-B2	Planktotalea arctica IMCC9565	91.5114	0.5317	69.36	84.4315	88.6544	50.2928
Aestuariivita boseongensis BS-B2	Planktotalea frisia SH6-1	92.1528	0.543	69.18	83.4684	88.4125	45.8287
Aestuariivita boseongensis BS-B2	Pontivivens insulae CeCT_8812	90.5292	0.9863	62.48	79.5939	83.9575	48.6872
Aestuariivita boseongensis BS-B2	Pseudodonghicola xiamenensis DSM_18339	93.8072	0.4793	70.81	86.464	89.693	57.6284
Aestuariivita boseongensis BS-B2	Pseudooctadecabacter jejudonensis CECT_8397	94.7662	0.68	67.79	82.9728	87.3915	52.8967
Aestuariivita boseongensis BS-B2	Pseudopelagicola gijangensis DSM_100564	93.0507	0.5536	68.79	84.56	89.148	50.0591
Aestuariivita boseongensis BS-B2	Pseudophaeobacter arcticus DSM_23566	92.42	0.6117	69.54	85.3098	89.0551	53.6998
Aestuariivita boseongensis BS-B2	Pseudophaeobacter leonis 306	92.0723	0.6443	69.47	76.4028	79.5291	47.3641
Aestuariivita boseongensis BS-B2	Pseudoroseicyclus aestuarii CECT_9025	91.6609	0.8649	64.78	81.7109	84.9332	54.6964
Aestuariivita boseongensis BS-B2	Rhodobaca barguzinensis alga05	90.549	0.8971	64.05	81.2478	85.5194	50.0196
Aestuariivita boseongensis BS-B2	Rhodovulum imhoffii DSM_18064	90.9028	0.7684	67.67	83.5356	87.2304	52.353
Aestuariivita boseongensis BS-B2	Rhodovulum kholense DSM_19783	91.0292	0.762	66.75	84.2213	87.4206	57.1704
Aestuariivita boseongensis BS-B2	Rhodovulum robiginosum DSM_12329	91.3074	0.7385	67.93	84.0962	87.4155	56.9159
Aestuariivita boseongensis BS-B2	Rhodovulum sulfidophilum DSM_1374	91.5855	0.7867	66.68	83.5865	86.7328	56.5845
Aestuariivita boseongensis BS-B2	Rhodovulum viride JA756	90.9597	0.7634	66.89	84.132	87.2981	57.2185
Aestuariivita boseongensis BS-B2	Roseibaca calidilacus HL-91	90.6944	0.9152	65.11	80.4679	84.9719	53.2176
Aestuariivita boseongensis BS-B2	Roseibaca ekhonensis CECT_7235	90.2778	0.9271	64.33	80.6637	85.072	52.3878
Aestuariivita boseongensis BS-B2	Roseibacterium elongatum DSM_19469	92.233	0.778	66.62	80.6179	84.0444	54.6057
Aestuariivita boseongensis BS-B2	Roseicitreum antarcticum CGMCC_1.8894	91.6609	0.8666	64.95	81.1677	85.1837	54.0479
Aestuariivita boseongensis BS-B2	Roseicyclus mahoneyensis DSM_16097	93.2498	0.7949	66.02	83.1619	86.7613	55.506
Aestuariivita boseongensis BS-B2	Roseinatronobacter thiooxidans ALG1	90.1389	0.8981	64.72	81.198	85.4532	52.2667
Aestuariivita boseongensis BS-B2	Roseisalinus antarcticus CECT_7023	93.5754	0.7574	66.6	84.0977	87.4397	55.6689
Aestuariivita boseongensis BS-B2	Roseobacter denitrificans OCh_114_DSM_7001	93.6319	0.5706	70.57	85.2213	88.9365	52.6574
Aestuariivita boseongensis BS-B2	Roseobacter litoralis Och_149	93.5619	0.5602	70.32	85.1798	89.357	51.1765
Aestuariivita boseongensis BS-B2	Rubrimonas cliftonensis DSM_15345	87.0923	1.2818	58.39	76.3205	79.9543	50.647
Aestuariivita boseongensis BS-B2	Sedimentitalea nanhaiensis DSM_24252	93.6067	0.4492	71.96	86.575	90.1052	56.2484
Aestuariivita boseongensis BS-B2	Shimia abyssi DSM_100673	94.7626	0.5852	68.89	84.6451	88.8014	50.5126
Aestuariivita boseongensis BS-B2	Shimia aestuarii DSM_15283	94.9022	0.5446	69.51	86.7794	89.9702	55.4066
Aestuariivita boseongensis BS-B2	Shimia haliotis DSM_28453	93.3936	0.5929	68.76	85.3747	89.31	52.3214
Aestuariivita boseongensis BS-B2	Shimia isoporae SW6_1	93.8719	0.5952	68.78	84.6299	88.758	48.848
Aestuariivita boseongensis BS-B2	Shimia marina CECT_7688	94.7038	0.6102	68.99	84.7923	88.1937	51.145
Aestuariivita boseongensis BS-B2	Shimia sagamensis JAMH011_1	94.0725	0.6068	68.36	84.4248	88.6165	49.6078
Aestuariivita boseongensis BS-B2	Silicimonas algicola DSM_103371	92.2006	0.8252	65.51	83.0398	86.7823	52.4563
Aestuariivita boseongensis BS-B2	Tabrizicola aquatica RCRI19	89.6456	0.9699	64.52	81.0918	84.8895	54.8221
Aestuariivita boseongensis BS-B2	Thalassobacter stenotrophicus CECT_5294	93.6111	0.7984	66.82	82.601	86.8967	49.0766
Aestuariivita boseongensis BS-B2	Thioclava arenosa CAU_1312	91.9332	0.9328	65.43	82.2616	85.6837	55.3231
Aestuariivita boseongensis BS-B2	Thioclava atlantica 13D2W-2	92.0778	1.002	64.42	82.5722	86.1294	55.1433
Aestuariivita boseongensis BS-B2	Thioclava dalianensis strain_DLFJ1-1	91.1111	1.0509	63.49	81.7427	85.5498	53.3475
Aestuariivita boseongensis BS-B2	Thioclava electrotropha Elox9	91.4524	1.0276	63.8	82.2695	85.9036	54.7769
Aestuariivita boseongensis BS-B2	Thioclava indica strain_DT23-4	90.9028	1.0203	63.97	81.6654	85.879	52.9245
Aestuariivita boseongensis BS-B2	Thioclava marina 11-10-0-13	91.7999	1.0074	64.22	83.1406	86.7109	54.8327
Aestuariivita boseongensis BS-B2	Thioclava nitratireducens 25B10_4	91.6551	1.0213	64.08	82.4345	85.9647	54.2783
Aestuariivita boseongensis BS-B2	Thioclava pacifica DSM_10166	92.0778	1.0005	64.58	82.9044	86.4894	54.6596
Aestuariivita boseongensis BS-B2	Thioclava sediminum TAW-CT134	91.516	1.0233	64.02	82.0028	85.633	54.5303
Aestuariivita boseongensis BS-B2	Tranquillimonas alkanivorans DSM_19547	91.697	0.7575	67.25	84.6089	87.7969	55.519
Aestuariivita boseongensis BS-B2	Wenxinia marina DSM_24838	91.7999	0.79	65.76	83.3573	86.2305	54.1464
Aestuariivita boseongensis BS-B2	Wenxinia saemankumensis DSM_100565	91.8694	0.8134	65.32	82.6881	85.3436	54.568
Aestuariivita boseongensis BS-B2	Yoonia litorea DSM_29433	92.2168	0.8057	67.76	83.9554	87.908	49.9266
Aestuariivita boseongensis BS-B2	Yoonia maricola DSM_29128	92.2114	0.7721	67.43	83.5383	87.8265	50.282
Aestuariivita boseongensis BS-B2	Yoonia maritima DSM_101533	91.3074	0.7341	67.11	83.1558	87.66	45.5755
Aestuariivita boseongensis BS-B2	Yoonia rosea DSM_29591	91.6551	0.7601	67.82	83.609	87.4457	51.5349
Aestuariivita boseongensis BS-B2	Yoonia sediminilitoris DSM_29955	91.516	0.7399	67.28	83.456	87.7818	50.8532
Aestuariivita boseongensis BS-B2	Yoonia tamlensis DSM_26879	91.2317	0.7519	67.2	83.1946	87.4362	50.5933
Aestuariivita boseongensis BS-B2	Yoonia vestfoldensis DSM_16212	91.6609	0.7979	67.39	83.3708	87.0009	55.5032
Ahrensia kielensis DSM_5890	Leisingera aquaemixtae CECT_8399	85.6383	2.2961	54.02	66.9789	74.2784	34.4279
Ahrensia kielensis DSM_5890	Leisingera daeponensis DSM_23529	85.8572	2.2952	54.06	67.0357	74.2716	34.5139
Ahrensia kielensis DSM_5890	Paenirhodobacter enshiensis DW2-9	86.7627	2.2792	52.45	66.3362	73.3935	33.0323
Ahrensia kielensis DSM_5890	Phaeobacter gallaeciensis DSM_26640	85.9043	2.3075	53.91	66.9617	74.4205	35.5776
Ahrensia kielensis DSM_5890	Phaeobacter inhibens DSM_16374	85.9043	2.2993	53.94	66.9561	74.4262	35.5484
Ahrensia kielensis DSM_5890	Tabrizicola aquatica RCRI19	87.1011	2.2054	53.25	66.5891	73.7674	33.0203
Ahrensia kielensis DSM_5890	Thioclava arenosa CAU_1312	87.0087	2.1684	53.08	66.6828	73.8398	34.0935
Ahrensia kielensis DSM_5890	Thioclava atlantica 13D2W-2	87.8162	2.2375	53.27	67.239	74.4365	33.2392
Ahrensia kielensis DSM_5890	Thioclava dalianensis strain_DLFJ1-1	87.6995	2.2864	53.61	66.5252	73.8741	34.7173
Ahrensia kielensis DSM_5890	Thioclava electrotropha Elox9	87.1676	2.2631	53.7	66.8023	74.148	34.0649
Ahrensia kielensis DSM_5890	Thioclava indica strain_DT23-4	87.8065	2.2558	53.38	66.6332	74.0527	35.5324
Ahrensia kielensis DSM_5890	Thioclava marina 11-10-0-13	87.0346	2.2429	53.1	67.0462	74.3028	33.7094
Ahrensia kielensis DSM_5890	Thioclava nitratireducens 25B10_4	87.8586	2.2568	53.15	66.8739	74.2273	33.8862
Ahrensia kielensis DSM_5890	Thioclava pacifica DSM_10166	87.525	2.236	53.01	67.2477	74.5054	34.1263
Ahrensia kielensis DSM_5890	Thioclava sediminum TAW-CT134	87.5917	2.2589	53.26	66.5737	73.9063	33.9118
Ahrensia marina LZD062	Leisingera aquaemixtae CECT_8399	85.6953	2.289	54.33	67.3116	74.2707	37.4448
Ahrensia marina LZD062	Leisingera daeponensis DSM_23529	86.0574	2.2881	54.37	67.3204	74.225	37.4837
Ahrensia marina LZD062	Paenirhodobacter enshiensis DW2-9	86.7627	2.2721	52.63	66.6441	73.247	36.1079
Ahrensia marina LZD062	Phaeobacter gallaeciensis DSM_26640	85.7618	2.3003	54.43	67.0642	74.2384	37.6471
Ahrensia marina LZD062	Phaeobacter inhibens DSM_16374	85.4957	2.2922	54.52	67.0771	74.2232	37.5905
Ahrensia marina LZD062	Tabrizicola aquatica RCRI19	86.5027	2.1983	53.69	66.8051	73.6464	35.8768
Ahrensia marina LZD062	Thioclava arenosa CAU_1312	87.0087	2.1613	53.6	66.9136	73.636	36.4919
Ahrensia marina LZD062	Thioclava atlantica 13D2W-2	88.0746	2.2304	53.34	67.4436	74.3492	36.1107
Ahrensia marina LZD062	Thioclava dalianensis strain_DLFJ1-1	87.6913	2.2793	53.77	66.7616	73.8083	36.9476
Ahrensia marina LZD062	Thioclava electrotropha Elox9	87.367	2.256	53.76	67.0678	74.1069	36.7838
Ahrensia marina LZD062	Thioclava indica strain_DT23-4	87.2101	2.2487	53.67	66.7048	73.919	37.2742
Ahrensia marina LZD062	Thioclava marina 11-10-0-13	86.8351	2.2358	53.38	67.2865	74.2473	36.3753
Ahrensia marina LZD062	Thioclava nitratireducens 25B10_4	88.0507	2.2497	53.58	67.113	74.1462	36.6594
Ahrensia marina LZD062	Thioclava pacifica DSM_10166	87.3164	2.2289	53.53	67.4764	74.4222	36.7053
Ahrensia marina LZD062	Thioclava sediminum TAW-CT134	87.7837	2.2518	53.48	66.8288	73.8767	36.5796
Albimonas donghaensis DSM_17890	Acuticoccus yangtzensis JL1095	87.5085	1.8412	54.14	69.4429	73.7344	54.8759
Albimonas donghaensis DSM_17890	Ahrensia kielensis DSM_5890	88.016	1.834	53.44	66.6541	73.4403	31.7231
Albimonas donghaensis DSM_17890	Ahrensia marina LZD062	87.2836	1.8269	53.94	67.0454	73.2894	35.3007
Albimonas donghaensis DSM_17890	Cereibacter changlensis DSM_18774	90.7182	1.1711	59.75	77.5469	80.8849	61.947
Albimonas donghaensis DSM_17890	Jannaschia donghaensis CECT_7802	90.2225	1.3727	59.6	75.5978	79.7463	54.7468
Albimonas donghaensis DSM_17890	Jannaschia faecimaris DSM_100420	90.3574	1.3547	59.28	75.8298	80.193	52.665
Albimonas donghaensis DSM_17890	Jannaschia helgolandensis DSM_14858	90.2357	1.3353	59.16	75.7037	80.0154	52.6838
Albimonas donghaensis DSM_17890	Jannaschia rubra CECT_5088	90.0877	1.3546	59.23	76.5331	79.9653	57.7803
Albimonas donghaensis DSM_17890	Leisingera aquaemixtae CECT_8399	89.8854	1.3897	59.22	77.0244	80.484	57.6348
Albimonas donghaensis DSM_17890	Leisingera aquimarina DSM_24565	89.3674	1.3843	58.78	76.328	80.1802	53.9687
Albimonas donghaensis DSM_17890	Leisingera caerulea DSM_24564	90.6567	1.3817	59.13	76.6959	80.3184	56.8651
Albimonas donghaensis DSM_17890	Leisingera daeponensis DSM_23529	89.1728	1.3888	59.31	77.0815	80.4324	57.895
Albimonas donghaensis DSM_17890	Leisingera methylohalidivorans DSM_14336	89.3889	1.4033	59.61	76.7282	80.4638	54.8625
Albimonas donghaensis DSM_17890	Paenirhodobacter enshiensis DW2-9	91.1888	1.3728	58.76	76.2644	80.1022	59.3434
Albimonas donghaensis DSM_17890	Palleronia abyssalis CECT_8504	90.3117	1.369	59.02	75.8788	79.5619	55.1607
Albimonas donghaensis DSM_17890	Palleronia marisminoris CECT_7066	88.9488	1.3664	59.2	76.4435	79.9211	58.4417
Albimonas donghaensis DSM_17890	Phaeobacter gallaeciensis DSM_26640	90.3574	1.4011	59.35	76.4114	80.4539	50.0061
Albimonas donghaensis DSM_17890	Phaeobacter inhibens DSM_16374	90.3574	1.3929	59.15	76.4335	80.4604	50.1032
Albimonas donghaensis DSM_17890	Phaeobacter italicus CECT_7645	89.264	1.3823	59.42	76.7062	80.536	50.7098
Albimonas donghaensis DSM_17890	Phaeobacter porticola strain_P97	89.5232	1.4102	59.44	76.1217	80.3147	48.2514
Albimonas donghaensis DSM_17890	Pseudophaeobacter arcticus DSM_23566	89.2111	1.4128	58.52	75.9567	80.1216	49.2939
Albimonas donghaensis DSM_17890	Pseudophaeobacter leonis 306	88.0457	1.4453	58.4	67.6871	71.377	43.67
Albimonas donghaensis DSM_17890	Rhodobaca barguzinensis alga05	91.6554	1.2263	59.5	76.0896	80.4793	46.9998
Albimonas donghaensis DSM_17890	Roseibaca calidilacus HL-91	90.9831	1.2444	59.59	75.6996	80.1174	50.6598
Albimonas donghaensis DSM_17890	Roseibaca ekhonensis CECT_7235	90.9831	1.2563	59.34	75.8375	80.1234	51.0316
Albimonas donghaensis DSM_17890	Roseinatronobacter thiooxidans ALG1	91.069	1.2272	59.99	76.2104	80.5796	48.7835
Albimonas donghaensis DSM_17890	Tabrizicola aquatica RCRI19	90.7182	1.299	59.5	76.1688	80.093	57.457
Albimonas donghaensis DSM_17890	Thioclava arenosa CAU_1312	90.0743	1.262	60.27	76.9034	80.4728	57.1606
Albimonas donghaensis DSM_17890	Thioclava atlantica 13D2W-2	90.6334	1.3311	59.29	77.2338	80.8178	58.6057
Albimonas donghaensis DSM_17890	Thioclava dalianensis strain_DLFJ1-1	90.5114	1.38	58.74	76.5528	80.3329	53.5722
Albimonas donghaensis DSM_17890	Thioclava electrotropha Elox9	90.8968	1.3567	58.94	76.7711	80.4613	56.6457
Albimonas donghaensis DSM_17890	Thioclava indica strain_DT23-4	91.6948	1.3494	59.3	76.0568	80.5277	50.621
Albimonas donghaensis DSM_17890	Thioclava marina 11-10-0-13	90.4922	1.3365	59.46	77.0195	80.6535	56.7926
Albimonas donghaensis DSM_17890	Thioclava nitratireducens 25B10_4	90.3833	1.3504	58.82	76.9398	80.5461	56.6802
Albimonas donghaensis DSM_17890	Thioclava pacifica DSM_10166	90.2488	1.3296	59.4	77.21	80.9175	56.6025
Albimonas donghaensis DSM_17890	Thioclava sediminum TAW-CT134	90.5178	1.3525	59.04	76.6224	80.2634	56.5879
Albimonas donghaensis DSM_17890	Yoonia litorea DSM_29433	89.3674	1.3901	59.51	75.1387	79.7301	45.6245
Albimonas donghaensis DSM_17890	Yoonia maricola DSM_29128	89.0762	1.3565	59.36	74.8661	79.8753	44.0274
Albimonas donghaensis DSM_17890	Yoonia rosea DSM_29591	89.4134	1.3444	59.88	75.4463	79.9821	46.2427
Albimonas pacifica CGMCC_1.11030	Acuticoccus yangtzensis JL1095	88.0325	1.8372	54.46	69.2491	73.6596	56.2472
Albimonas pacifica CGMCC_1.11030	Ahrensia kielensis DSM_5890	87.4	1.83	53.43	66.5439	73.4109	30.9187
Albimonas pacifica CGMCC_1.11030	Ahrensia marina LZD062	87	1.8229	53.62	66.8143	73.2994	34.2789
Albimonas pacifica CGMCC_1.11030	Cereibacter changlensis DSM_18774	89.3919	1.167	59.8	77.391	80.7986	62.4386
Albimonas pacifica CGMCC_1.11030	Jannaschia donghaensis CECT_7802	90	1.3686	59.06	75.2392	79.3739	54.3944
Albimonas pacifica CGMCC_1.11030	Jannaschia faecimaris DSM_100420	89.8649	1.3506	58.68	75.4585	79.8017	52.4994
Albimonas pacifica CGMCC_1.11030	Jannaschia helgolandensis DSM_14858	90.6567	1.3312	59.33	75.4258	79.7541	52.3904
Albimonas pacifica CGMCC_1.11030	Jannaschia rubra CECT_5088	90.5341	1.3505	59.5	76.2902	79.7842	58.4212
Albimonas pacifica CGMCC_1.11030	Leisingera aquaemixtae CECT_8399	89.8374	1.3856	59.11	76.8142	80.277	58.0749
Albimonas pacifica CGMCC_1.11030	Leisingera aquimarina DSM_24565	89.4595	1.3802	58.79	76.274	79.9909	54.0652
Albimonas pacifica CGMCC_1.11030	Leisingera caerulea DSM_24564	90.0407	1.3776	58.89	76.5383	80.1609	57.2232
Albimonas pacifica CGMCC_1.11030	Leisingera daeponensis DSM_23529	89.6552	1.3847	59.04	76.8891	80.2683	58.2236
Albimonas pacifica CGMCC_1.11030	Leisingera methylohalidivorans DSM_14336	89.8785	1.3992	59.94	76.5569	80.2149	55.005
Albimonas pacifica CGMCC_1.11030	Paenirhodobacter enshiensis DW2-9	89.8329	1.3688	58.77	76.2689	79.8829	59.8776
Albimonas pacifica CGMCC_1.11030	Palleronia abyssalis CECT_8504	90.6504	1.3649	59.08	75.753	79.4081	55.5787
Albimonas pacifica CGMCC_1.11030	Palleronia marisminoris CECT_7066	89.9797	1.3623	59.32	76.2708	79.6054	59.5085
Albimonas pacifica CGMCC_1.11030	Phaeobacter gallaeciensis DSM_26640	90.589	1.397	59.28	76.1112	80.2538	49.8342
Albimonas pacifica CGMCC_1.11030	Phaeobacter inhibens DSM_16374	90.3182	1.3888	59.01	76.187	80.2239	49.8096
Albimonas pacifica CGMCC_1.11030	Phaeobacter italicus CECT_7645	89.7019	1.3783	59.26	76.4417	80.302	50.4841
Albimonas pacifica CGMCC_1.11030	Phaeobacter porticola strain_P97	90.1418	1.4061	59.26	75.8614	80.1169	47.8181
Albimonas pacifica CGMCC_1.11030	Pseudophaeobacter arcticus DSM_23566	89.9051	1.4087	58.7	75.8246	79.8807	48.7865
Albimonas pacifica CGMCC_1.11030	Pseudophaeobacter leonis 306	88.9939	1.4412	58.23	67.5163	71.2371	43.0463
Albimonas pacifica CGMCC_1.11030	Rhodobaca barguzinensis alga05	90	1.2222	59.36	75.9636	80.2558	45.9443
Albimonas pacifica CGMCC_1.11030	Roseibaca calidilacus HL-91	89.4666	1.2403	59.71	75.611	79.796	49.7664
Albimonas pacifica CGMCC_1.11030	Roseibaca ekhonensis CECT_7235	89.8717	1.2522	59.9	75.6366	79.7021	50.2109
Albimonas pacifica CGMCC_1.11030	Roseinatronobacter thiooxidans ALG1	89.8042	1.2231	59.48	76.0043	80.2461	47.788
Albimonas pacifica CGMCC_1.11030	Tabrizicola aquatica RCRI19	90.0676	1.295	59.5	75.971	79.9583	58.1849
Albimonas pacifica CGMCC_1.11030	Thioclava arenosa CAU_1312	91.3161	1.2579	60.49	76.7832	80.2577	57.7952
Albimonas pacifica CGMCC_1.11030	Thioclava atlantica 13D2W-2	91.8077	1.327	59.31	77.3609	80.6769	59.3603
Albimonas pacifica CGMCC_1.11030	Thioclava dalianensis strain_DLFJ1-1	91.4073	1.376	58.72	76.4358	80.2095	53.497
Albimonas pacifica CGMCC_1.11030	Thioclava electrotropha Elox9	91.6779	1.3526	58.94	76.674	80.3412	57.5488
Albimonas pacifica CGMCC_1.11030	Thioclava indica strain_DT23-4	91.2281	1.3453	58.75	75.9136	80.3695	50.2388
Albimonas pacifica CGMCC_1.11030	Thioclava marina 11-10-0-13	91.9486	1.3324	59.43	77.007	80.4544	57.5875
Albimonas pacifica CGMCC_1.11030	Thioclava nitratireducens 25B10_4	91.4131	1.3463	58.87	76.7788	80.3733	57.4267
Albimonas pacifica CGMCC_1.11030	Thioclava pacifica DSM_10166	91.954	1.3256	59.45	77.1776	80.7143	57.3807
Albimonas pacifica CGMCC_1.11030	Thioclava sediminum TAW-CT134	91.5483	1.3484	59.1	76.4818	80.1075	57.4853
Albimonas pacifica CGMCC_1.11030	Yoonia litorea DSM_29433	89.1892	1.386	59.26	74.9273	79.6089	45.42
Albimonas pacifica CGMCC_1.11030	Yoonia maricola DSM_29128	89.0318	1.3524	58.76	74.5853	79.6058	43.4433
Albimonas pacifica CGMCC_1.11030	Yoonia rosea DSM_29591	89.2954	1.3404	59.61	75.2669	79.8188	45.9064
Aliiroseovarius crassostreae CV919-312	Acuticoccus yangtzensis JL1095	87.3144	2.1492	52.35	68.1144	73.7155	43.9822
Aliiroseovarius crassostreae CV919-312	Ahrensia kielensis DSM_5890	88.0826	2.142	53.28	66.8313	74.4704	35.689
Aliiroseovarius crassostreae CV919-312	Ahrensia marina LZD062	87.5499	2.1349	53.63	67.0116	74.3723	37.7843
Aliiroseovarius crassostreae CV919-312	Albimonas donghaensis DSM_17890	89.3674	1.2356	59.24	76.4637	80.5521	49.2511
Aliiroseovarius crassostreae CV919-312	Albimonas pacifica CGMCC_1.11030	90.5277	1.2316	59.1	76.3422	80.3973	48.3788
Aliiroseovarius crassostreae CV919-312	Amylibacter kogurei strain_4G11	93.5223	1.0592	62.36	76.5318	83.9654	42.5825
Aliiroseovarius crassostreae CV919-312	Boseongicola aestuarii CECT_8489	93.788	0.8327	65.21	81.6719	86.3948	47.6616
Aliiroseovarius crassostreae CV919-312	Brevirhabdus pacifica 22DY15	94.7154	0.8225	66.35	80.9981	84.7679	51.4772
Aliiroseovarius crassostreae CV919-312	Cereibacter changlensis DSM_18774	90.29	0.8869	64.82	81.8871	85.6289	52.5808
Aliiroseovarius crassostreae CV919-312	Cognatiyoonia koreensis DSM_17925	93.5091	0.8285	65.38	81.4024	86.2001	46.5874
Aliiroseovarius crassostreae CV919-312	Cognatiyoonia sediminum DSM_28715	92.7027	0.8793	66.11	80.7568	86.1649	45.6166
Aliiroseovarius crassostreae CV919-312	Cribrihabitans marinus DSM_29340	91.954	0.7632	66.16	83.4819	86.9685	53.3522
Aliiroseovarius crassostreae CV919-312	Dinoroseobacter shibae DFL_12	93.7796	0.7957	65.97	82.4971	86.2852	51.3647
Aliiroseovarius crassostreae CV919-312	Haematobacter massiliensis CCUG_47968	90.7923	0.9109	63.93	81.1072	85.0337	48.5451
Aliiroseovarius crassostreae CV919-312	Haematobacter missouriensis H1892	91.3131	0.9099	63.78	80.8337	84.9048	48.3469
Aliiroseovarius crassostreae CV919-312	Hasllibacter halocynthiae DSM_29318	93.8514	1.0958	62.14	77.8361	81.3456	46.5487
Aliiroseovarius crassostreae CV919-312	Hwanghaeicola aestuarii DSM_22009	89.7661	0.9131	63.76	80.3941	84.186	46.4063
Aliiroseovarius crassostreae CV919-312	Jannaschia aquimarina GSW-M26	93.2432	0.9464	62.97	79.4726	83.397	47.7866
Aliiroseovarius crassostreae CV919-312	Jannaschia donghaensis CECT_7802	93.4592	1.0262	63.42	80.1202	84.5456	48.8896
Aliiroseovarius crassostreae CV919-312	Jannaschia faecimaris DSM_100420	93.122	1.0081	63.36	80.2181	84.8794	47.6791
Aliiroseovarius crassostreae CV919-312	Jannaschia helgolandensis DSM_14858	94.3919	0.9887	63.43	79.9596	84.416	48.8376
Aliiroseovarius crassostreae CV919-312	Jannaschia pohangensis DSM_19073	94.1216	0.9424	63.47	80.8678	84.8903	50.0774
Aliiroseovarius crassostreae CV919-312	Jannaschia rubra CECT_5088	93.3198	1.008	63.63	80.5389	84.3707	48.9763
Aliiroseovarius crassostreae CV919-312	Jannaschia seohaensis DSM_25227	93.1757	0.9242	63.55	80.7545	84.7133	49.9645
Aliiroseovarius crassostreae CV919-312	Kandeliimicrobium roseum XY-R6	90.9217	0.8406	65.7	81.8955	85.5573	50.8435
Aliiroseovarius crassostreae CV919-312	Leisingera aquaemixtae CECT_8399	93.5767	0.8959	67.16	84.7405	88.0729	55.5916
Aliiroseovarius crassostreae CV919-312	Leisingera aquimarina DSM_24565	93.6529	0.8904	67.39	84.2074	87.9734	54.6674
Aliiroseovarius crassostreae CV919-312	Leisingera caerulea DSM_24564	93.3739	0.8879	67.16	84.3879	87.9339	55.0409
Aliiroseovarius crassostreae CV919-312	Leisingera daeponensis DSM_23529	93.1757	0.8949	67.52	84.8674	88.1608	55.5066
Aliiroseovarius crassostreae CV919-312	Leisingera methylohalidivorans DSM_14336	93.6615	0.9094	67.3	84.5059	88.1591	54.6861
Aliiroseovarius crassostreae CV919-312	Limimaricola cinnabarinus LL-001	91.954	0.9379	64.36	75.9247	79.6145	47.5064
Aliiroseovarius crassostreae CV919-312	Limimaricola hongkongensis DSM_17492	91.616	0.8883	65.04	81.274	85.0245	51.735
Aliiroseovarius crassostreae CV919-312	Limimaricola pyoseonensis DSM_21424	91.3455	0.8667	64.62	81.7736	85.3012	51.7221
Aliiroseovarius crassostreae CV919-312	Limimaricola soesokkakensis CECT_8367	91.8864	0.9148	64.8	81.6407	85.4573	51.2772
Aliiroseovarius crassostreae CV919-312	Litoreibacter albidus DSM_26922	94.0067	0.8553	65.48	81.3253	86.4571	48.7482
Aliiroseovarius crassostreae CV919-312	Litoreibacter arenae DSM_19593	94.332	0.7969	65.63	81.7591	86.479	50.9687
Aliiroseovarius crassostreae CV919-312	Litoreibacter ascidiaceicola DSM_100566	94.5381	0.8365	65.59	81.3315	86.3417	49.7227
Aliiroseovarius crassostreae CV919-312	Litoreibacter halocynthiae MA1-10_1	94.2009	0.8399	65.68	81.3142	86.3777	49.4684
Aliiroseovarius crassostreae CV919-312	Litoreibacter janthinus DSM_26921	94.7439	0.817	65.93	81.3646	86.4552	48.0236
Aliiroseovarius crassostreae CV919-312	Litoreibacter meonggei DSM_29466	95.5375	0.8358	65.59	81.06	86.3313	49.0622
Aliiroseovarius crassostreae CV919-312	Loktanella atrilutea DSM_29326	91.6273	0.873	64.12	81.0982	84.8472	50.577
Aliiroseovarius crassostreae CV919-312	Loktanella fryxellensis DSM_16213	91.5037	0.8825	63.96	80.6692	84.3103	50.6516
Aliiroseovarius crassostreae CV919-312	Loktanella salsilacus DSM_16199	92.0946	0.8711	64.04	80.9377	85.3382	49.3143
Aliiroseovarius crassostreae CV919-312	Marinibacterium profundimaris 22II1-22F33	92.6928	0.8206	65.51	82.6842	86.2394	53.0115
Aliiroseovarius crassostreae CV919-312	Monaibacterium marinum C7	90.4794	1.0655	61.07	78.3134	83.2349	47.1178
Aliiroseovarius crassostreae CV919-312	Neptunicoccus sediminis CY02	93.1359	0.9519	63.47	80.0797	85.0224	48.238
Aliiroseovarius crassostreae CV919-312	Nioella nitratireducens SSW136	94.3243	0.8001	65.73	82.5324	86.627	52.9342
Aliiroseovarius crassostreae CV919-312	Nioella sediminis JS7-11	94.4557	0.7732	66.16	82.5678	86.2122	52.8314
Aliiroseovarius crassostreae CV919-312	Oceanicella actignis CGMCC_1.10808	89.3528	1.1887	60.67	77.3228	81.2181	49.4583
Aliiroseovarius crassostreae CV919-312	Oceaniglobus indicus 1-19b	92.1886	0.8699	65.63	81.391	85.3728	51.2592
Aliiroseovarius crassostreae CV919-312	Oceaniovalibus guishaninsula JLT2003	91.5655	0.9519	64.87	78.8456	82.6259	49.4738
Aliiroseovarius crassostreae CV919-312	Octadecabacter antarcticus 307	93.6572	0.87	64.74	79.9918	85.2313	45.7137
Aliiroseovarius crassostreae CV919-312	Octadecabacter arcticus 238	93.788	0.8666	65.34	80.0245	85.2711	46.2335
Aliiroseovarius crassostreae CV919-312	Octadecabacter ascidiaceicola CECT_8868	93.9946	0.8276	65.44	81.1451	86.1783	45.7366
Aliiroseovarius crassostreae CV919-312	Octadecabacter temperatus SB1	93.2524	0.8232	65.27	80.9882	86.1055	45.0696
Aliiroseovarius crassostreae CV919-312	Pacificibacter marinus DSM_25228	95.0034	0.7033	65.12	80.5771	86.9606	44.1487
Aliiroseovarius crassostreae CV919-312	Pacificibacter maritimus DSM_104731	95.2059	0.7052	65.19	80.5914	87.0918	44.2113
Aliiroseovarius crassostreae CV919-312	Paenirhodobacter enshiensis DW2-9	90	1.0886	62.95	80.6099	84.5107	51.2413
Aliiroseovarius crassostreae CV919-312	Palleronia abyssalis CECT_8504	92.1675	0.9914	63.98	80.083	84.2958	48.8431
Aliiroseovarius crassostreae CV919-312	Palleronia marisminoris CECT_7066	91.7512	0.9888	63.71	80.7489	84.6589	49.7235
Aliiroseovarius crassostreae CV919-312	Pararhodobacter aggregans D1-19	90.7008	0.9507	62.79	80.5214	84.3185	52.1477
Aliiroseovarius crassostreae CV919-312	Pararhodobacter marinus CIC4N-9	91.0871	0.9358	63.25	80.4506	84.3182	51.8289
Aliiroseovarius crassostreae CV919-312	Phaeobacter gallaeciensis DSM_26640	94.05	0.9072	67.43	84.0626	87.8189	52.3547
Aliiroseovarius crassostreae CV919-312	Phaeobacter inhibens DSM_16374	94.05	0.899	67	84.2763	87.9171	52.5498
Aliiroseovarius crassostreae CV919-312	Phaeobacter italicus CECT_7645	94.7262	0.8885	67.23	84.4253	88.0088	52.6147
Aliiroseovarius crassostreae CV919-312	Phaeobacter porticola strain_P97	93.8596	0.9163	67.03	83.6247	87.624	51.5115
Aliiroseovarius crassostreae CV919-312	Pontivivens insulae CeCT_8812	90.8907	1.0312	61.08	78.8815	83.4267	46.9138
Aliiroseovarius crassostreae CV919-312	Pseudodonghicola xiamenensis DSM_18339	92.0557	0.7865	66.29	83.4699	87.1945	53.5981
Aliiroseovarius crassostreae CV919-312	Pseudophaeobacter arcticus DSM_23566	92.9682	0.9189	66.42	83.6443	87.5961	52.7307
Aliiroseovarius crassostreae CV919-312	Pseudophaeobacter leonis 306	91.7004	0.9515	66.21	74.6548	78.0089	46.6103
Aliiroseovarius crassostreae CV919-312	Pseudoroseicyclus aestuarii CECT_9025	91.8188	0.9555	63.53	79.6808	83.2327	49.8326
Aliiroseovarius crassostreae CV919-312	Rhodobaca barguzinensis alga05	90.2291	0.9421	63.34	80.299	85.0271	48.2498
Aliiroseovarius crassostreae CV919-312	Rhodovulum imhoffii DSM_18064	90.7557	0.8134	66.33	81.8127	85.8204	49.6564
Aliiroseovarius crassostreae CV919-312	Rhodovulum kholense DSM_19783	91.2838	0.8069	65.52	82.5563	86.1263	52.9545
Aliiroseovarius crassostreae CV919-312	Rhodovulum robiginosum DSM_12329	91.8243	0.7834	66.62	82.2764	86.0068	52.3242
Aliiroseovarius crassostreae CV919-312	Rhodovulum sulfidophilum DSM_1374	91.6216	0.8316	65.65	82.6362	86.2208	52.9551
Aliiroseovarius crassostreae CV919-312	Rhodovulum viride JA756	91.4131	0.8084	65.55	82.467	86.0156	53.0623
Aliiroseovarius crassostreae CV919-312	Roseibaca calidilacus HL-91	89.9663	0.9602	63.3	79.8635	84.503	50.336
Aliiroseovarius crassostreae CV919-312	Roseibaca ekhonensis CECT_7235	90.5051	0.9721	63.01	79.8812	84.52	49.8035
Aliiroseovarius crassostreae CV919-312	Roseibacterium elongatum DSM_19469	93.4724	0.823	64.94	78.4216	82.231	49.984
Aliiroseovarius crassostreae CV919-312	Roseicitreum antarcticum CGMCC_1.8894	90.5051	0.9115	63.99	80.023	84.5916	50.2398
Aliiroseovarius crassostreae CV919-312	Roseicyclus mahoneyensis DSM_16097	92.178	0.8398	64.19	81.4885	85.487	51.1752
Aliiroseovarius crassostreae CV919-312	Roseinatronobacter thiooxidans ALG1	90.4377	0.943	63.6	80.2644	84.943	49.4085
Aliiroseovarius crassostreae CV919-312	Roseisalinus antarcticus CECT_7023	92.0892	0.8479	64.91	81.5695	85.278	50.8551
Aliiroseovarius crassostreae CV919-312	Roseobacter denitrificans OCh_114_DSM_7001	93.3784	0.8164	65.78	81.6532	86.1865	48.9574
Aliiroseovarius crassostreae CV919-312	Roseobacter litoralis Och_149	93.8514	0.806	65.89	81.7641	86.6205	47.7748
Aliiroseovarius crassostreae CV919-312	Rubrimonas cliftonensis DSM_15345	87.9136	1.3268	57.98	75.6843	79.5533	47.1159
Aliiroseovarius crassostreae CV919-312	Sedimentitalea nanhaiensis DSM_24252	93.3828	0.7564	66.84	82.7896	86.9319	51.8092
Aliiroseovarius crassostreae CV919-312	Shimia abyssi DSM_100673	94.3205	0.7865	67.46	83.6704	88.1848	49.2994
Aliiroseovarius crassostreae CV919-312	Shimia aestuarii DSM_15283	94.3205	0.7458	67.8	84.9854	88.4876	53.588
Aliiroseovarius crassostreae CV919-312	Shimia haliotis DSM_28453	95.3347	0.7942	66.68	84.1079	88.3237	51.5492
Aliiroseovarius crassostreae CV919-312	Shimia isoporae SW6_1	94.3282	0.7964	66.66	83.9064	88.2976	48.3005
Aliiroseovarius crassostreae CV919-312	Shimia marina CECT_7688	94.1296	0.8114	67.65	84.1717	88.0014	51.2898
Aliiroseovarius crassostreae CV919-312	Shimia sagamensis JAMH011_1	93.9271	0.8081	66.7	83.9259	88.4762	49.9929
Aliiroseovarius crassostreae CV919-312	Silicimonas algicola DSM_103371	92.2402	0.8702	64.18	81.3088	85.1469	47.6507
Aliiroseovarius crassostreae CV919-312	Tabrizicola aquatica RCRI19	89.6226	1.0149	63.91	80.5351	84.3288	51.1402
Aliiroseovarius crassostreae CV919-312	Thalassobacter stenotrophicus CECT_5294	94.4818	0.8434	65.12	81.1562	85.9967	47.0036
Aliiroseovarius crassostreae CV919-312	Thioclava arenosa CAU_1312	91.5483	0.9778	65.3	82.027	85.6952	53.0421
Aliiroseovarius crassostreae CV919-312	Thioclava atlantica 13D2W-2	92.7126	1.0469	64.74	82.1941	85.9632	51.9512
Aliiroseovarius crassostreae CV919-312	Thioclava dalianensis strain_DLFJ1-1	92.8523	1.0959	63.95	81.3088	85.4606	51.0188
Aliiroseovarius crassostreae CV919-312	Thioclava electrotropha Elox9	92.4375	1.0725	64.2	81.7928	85.7275	52.0962
Aliiroseovarius crassostreae CV919-312	Thioclava indica strain_DT23-4	92.3957	1.0652	63.96	81.2487	85.8703	51.2216
Aliiroseovarius crassostreae CV919-312	Thioclava marina 11-10-0-13	92.9102	1.0523	64.34	82.1354	85.9856	51.8335
Aliiroseovarius crassostreae CV919-312	Thioclava nitratireducens 25B10_4	92.5726	1.0662	64.22	81.9357	85.9091	51.6916
Aliiroseovarius crassostreae CV919-312	Thioclava pacifica DSM_10166	93.0452	1.0455	64.4	82.3197	86.2718	51.904
Aliiroseovarius crassostreae CV919-312	Thioclava sediminum TAW-CT134	92.4375	1.0683	64.3	81.6499	85.5847	52.0452
Aliiroseovarius crassostreae CV919-312	Tranquillimonas alkanivorans DSM_19547	91.1208	0.8024	66.3	82.4879	86.2977	50.7595
Aliiroseovarius crassostreae CV919-312	Wenxinia marina DSM_24838	92.3025	0.8805	64.72	80.7381	84.0786	49.3684
Aliiroseovarius crassostreae CV919-312	Wenxinia saemankumensis DSM_100565	92.37	0.9039	64.22	81.0379	84.1071	49.7531
Aliiroseovarius crassostreae CV919-312	Yoonia litorea DSM_29433	93.5047	0.8962	65.64	81.4649	86.1334	47.3175
Aliiroseovarius crassostreae CV919-312	Yoonia maricola DSM_29128	93.4415	0.8626	65.53	81.3358	86.2582	47.5798
Aliiroseovarius crassostreae CV919-312	Yoonia maritima DSM_101533	93.3063	0.8246	65.66	81.966	86.9936	44.6894
Aliiroseovarius crassostreae CV919-312	Yoonia rosea DSM_29591	93.1711	0.8506	65.96	81.975	86.467	49.3137
Aliiroseovarius crassostreae CV919-312	Yoonia sediminilitoris DSM_29955	92.2245	0.8304	65.34	81.7403	86.6686	48.651
Aliiroseovarius crassostreae CV919-312	Yoonia tamlensis DSM_26879	92.6401	0.8425	65.6	82.0356	86.6704	49.0372
Aliiroseovarius crassostreae CV919-312	Yoonia vestfoldensis DSM_16212	92.1053	0.8884	65.47	81.7104	85.9552	51.0692
Aliiroseovarius halocynthiae MA1_10_1	Acuticoccus yangtzensis JL1095	87.2887	2.1594	52.66	67.7983	73.702	42.8167
Aliiroseovarius halocynthiae MA1_10_1	Ahrensia kielensis DSM_5890	87.9574	2.1522	53.76	66.7811	74.5603	35.8032
Aliiroseovarius halocynthiae MA1_10_1	Ahrensia marina LZD062	87.5582	2.1451	54.13	67.0612	74.4764	37.4355
Aliiroseovarius halocynthiae MA1_10_1	Albimonas donghaensis DSM_17890	89.4737	1.2458	59.45	76.2385	80.685	47.7144
Aliiroseovarius halocynthiae MA1_10_1	Albimonas pacifica CGMCC_1.11030	90.2439	1.2418	59.54	75.9432	80.398	47.2984
Aliiroseovarius halocynthiae MA1_10_1	Amylibacter kogurei strain_4G11	92.78	1.0694	62.42	76.8983	84.1358	42.7331
Aliiroseovarius halocynthiae MA1_10_1	Boseongicola aestuarii CECT_8489	93.6529	0.8429	65.38	81.4779	86.2579	47.3814
Aliiroseovarius halocynthiae MA1_10_1	Cereibacter changlensis DSM_18774	90.0676	0.8971	64.61	81.4823	85.496	50.8147
Aliiroseovarius halocynthiae MA1_10_1	Cognatiyoonia koreensis DSM_17925	94.5122	0.8387	65.61	81.7441	86.5733	46.6875
Aliiroseovarius halocynthiae MA1_10_1	Cognatiyoonia sediminum DSM_28715	93.4371	0.8895	65.89	81.0454	86.5019	46.0237
Aliiroseovarius halocynthiae MA1_10_1	Haematobacter massiliensis CCUG_47968	90.6228	0.9211	63.31	80.7355	84.9666	47.1172
Aliiroseovarius halocynthiae MA1_10_1	Haematobacter missouriensis H1892	91.0871	0.9201	63.22	80.4356	84.8008	46.778
Aliiroseovarius halocynthiae MA1_10_1	Hasllibacter halocynthiae DSM_29318	94.2451	1.106	61.92	77.7233	81.4866	46.0786
Aliiroseovarius halocynthiae MA1_10_1	Hwanghaeicola aestuarii DSM_22009	90.0881	0.9233	63.43	80.1648	84.2148	45.6026
Aliiroseovarius halocynthiae MA1_10_1	Jannaschia aquimarina GSW-M26	91.7568	0.9566	63.04	79.432	83.6245	46.9494
Aliiroseovarius halocynthiae MA1_10_1	Jannaschia donghaensis CECT_7802	93.1895	1.0363	63.36	79.9029	84.7929	48.3146
Aliiroseovarius halocynthiae MA1_10_1	Jannaschia faecimaris DSM_100420	93.122	1.0183	63.65	80.1013	85.0222	47.464
Aliiroseovarius halocynthiae MA1_10_1	Jannaschia helgolandensis DSM_14858	93.7162	0.9989	63.31	79.9659	84.67	48.1823
Aliiroseovarius halocynthiae MA1_10_1	Jannaschia pohangensis DSM_19073	94.6622	0.9526	63.39	80.7347	85.1223	49.3073
Aliiroseovarius halocynthiae MA1_10_1	Jannaschia rubra CECT_5088	93.1803	1.0182	63.31	80.428	84.5943	48.1988
Aliiroseovarius halocynthiae MA1_10_1	Jannaschia seohaensis DSM_25227	93.3784	0.9344	63.41	80.5187	84.8197	48.8737
Aliiroseovarius halocynthiae MA1_10_1	Kandeliimicrobium roseum XY-R6	90.9028	0.8508	65.66	81.7097	85.6996	49.8569
Aliiroseovarius halocynthiae MA1_10_1	Leisingera aquaemixtae CECT_8399	93.7669	0.906	67.33	84.377	88.1957	53.231
Aliiroseovarius halocynthiae MA1_10_1	Leisingera aquimarina DSM_24565	93.6444	0.9006	66.93	83.951	87.8995	52.4217
Aliiroseovarius halocynthiae MA1_10_1	Leisingera caerulea DSM_24564	93.5637	0.898	67.14	84.1321	87.9929	52.9639
Aliiroseovarius halocynthiae MA1_10_1	Leisingera daeponensis DSM_23529	93.3153	0.9051	67.36	84.4244	88.1665	53.2393
Aliiroseovarius halocynthiae MA1_10_1	Leisingera methylohalidivorans DSM_14336	93.9987	0.9196	67.37	84.2368	88.1008	52.4695
Aliiroseovarius halocynthiae MA1_10_1	Limimaricola cinnabarinus LL-001	92.0054	0.9481	64.51	75.6193	79.7017	46.0286
Aliiroseovarius halocynthiae MA1_10_1	Limimaricola hongkongensis DSM_17492	91.8589	0.8985	64.78	81.0135	85.1587	49.9964
Aliiroseovarius halocynthiae MA1_10_1	Limimaricola pyoseonensis DSM_21424	91.8022	0.8769	64.02	81.44	85.3938	50.096
Aliiroseovarius halocynthiae MA1_10_1	Limimaricola soesokkakensis CECT_8367	91.7344	0.9249	64.66	81.3707	85.5568	49.623
Aliiroseovarius halocynthiae MA1_10_1	Litoreibacter albidus DSM_26922	94.1892	0.8655	65.65	81.5556	86.7526	49.0658
Aliiroseovarius halocynthiae MA1_10_1	Litoreibacter ascidiaceicola DSM_100566	93.9189	0.8467	65.78	81.4977	86.5902	49.4397
Aliiroseovarius halocynthiae MA1_10_1	Litoreibacter halocynthiae MA1-10_1	94.046	0.85	65.84	81.4431	86.588	49.1167
Aliiroseovarius halocynthiae MA1_10_1	Litoreibacter meonggei DSM_29466	94.6586	0.846	65.5	81.3383	86.496	48.9416
Aliiroseovarius halocynthiae MA1_10_1	Loktanella atrilutea DSM_29326	91.8133	0.8832	64.37	80.9942	85.0171	49.6293
Aliiroseovarius halocynthiae MA1_10_1	Loktanella salsilacus DSM_16199	91.8298	0.8813	64.72	80.9701	85.5785	49.7874
Aliiroseovarius halocynthiae MA1_10_1	Monaibacterium marinum C7	91.4015	1.0757	61.46	78.2701	83.3182	46.435
Aliiroseovarius halocynthiae MA1_10_1	Neptunicoccus sediminis CY02	92.8668	0.9621	62.81	79.9488	85.1546	46.6516
Aliiroseovarius halocynthiae MA1_10_1	Nioella nitratireducens SSW136	93.7035	0.8103	65.75	82.4436	86.8916	51.1419
Aliiroseovarius halocynthiae MA1_10_1	Nioella sediminis JS7-11	93.8514	0.7834	65.91	82.2473	86.2517	51.0247
Aliiroseovarius halocynthiae MA1_10_1	Oceanicella actignis CGMCC_1.10808	89.0821	1.1989	60.34	76.8154	81.1576	48.3538
Aliiroseovarius halocynthiae MA1_10_1	Oceaniglobus indicus 1-19b	91.4478	0.8801	64.98	81.0947	85.4748	50.3129
Aliiroseovarius halocynthiae MA1_10_1	Oceaniovalibus guishaninsula JLT2003	91.8974	0.9621	64.43	78.6706	82.7149	48.5194
Aliiroseovarius halocynthiae MA1_10_1	Paenirhodobacter enshiensis DW2-9	90.3136	1.0988	62.86	80.1205	84.4572	49.9467
Aliiroseovarius halocynthiae MA1_10_1	Palleronia abyssalis CECT_8504	92.8184	1.0015	63.62	79.9301	84.5066	48.4517
Aliiroseovarius halocynthiae MA1_10_1	Palleronia marisminoris CECT_7066	91.7512	0.9989	63.3	80.4811	84.8279	49.2812
Aliiroseovarius halocynthiae MA1_10_1	Pararhodobacter aggregans D1-19	91.0811	0.9609	62.73	80.1528	84.3235	50.4541
Aliiroseovarius halocynthiae MA1_10_1	Pararhodobacter marinus CIC4N-9	91.2779	0.946	62.9	80.0327	84.2971	50.9104
Aliiroseovarius halocynthiae MA1_10_1	Phaeobacter gallaeciensis DSM_26640	94.7154	0.9174	67.21	83.7552	87.8901	50.2602
Aliiroseovarius halocynthiae MA1_10_1	Phaeobacter inhibens DSM_16374	94.7154	0.9092	67.19	83.8055	87.9932	50.2196
Aliiroseovarius halocynthiae MA1_10_1	Phaeobacter italicus CECT_7645	95.4545	0.8987	67.51	84.0063	88.0497	51.4177
Aliiroseovarius halocynthiae MA1_10_1	Phaeobacter porticola strain_P97	94.0661	0.9265	67.03	83.3239	87.7319	49.6802
Aliiroseovarius halocynthiae MA1_10_1	Pontivivens insulae CeCT_8812	90.682	1.0414	61.72	78.9149	83.6358	46.2542
Aliiroseovarius halocynthiae MA1_10_1	Pseudophaeobacter arcticus DSM_23566	94.1734	0.9291	66.5	83.5011	87.8137	50.5994
Aliiroseovarius halocynthiae MA1_10_1	Pseudophaeobacter leonis 306	92.65	0.9616	66.69	74.3556	78.0224	44.8861
Aliiroseovarius halocynthiae MA1_10_1	Rhodobaca barguzinensis alga05	90.4054	0.9523	63.46	80.1791	85.2684	46.9087
Aliiroseovarius halocynthiae MA1_10_1	Rhodovulum kholense DSM_19783	90.6567	0.8171	65.27	82.3368	86.1032	51.0743
Aliiroseovarius halocynthiae MA1_10_1	Rhodovulum robiginosum DSM_12329	91.0196	0.7936	66.68	82.0727	86.1025	50.5331
Aliiroseovarius halocynthiae MA1_10_1	Rhodovulum sulfidophilum DSM_1374	91.2661	0.8418	65.46	82.414	86.2706	50.9579
Aliiroseovarius halocynthiae MA1_10_1	Rhodovulum viride JA756	90.9831	0.8185	65.33	82.3164	86.0873	51.1334
Aliiroseovarius halocynthiae MA1_10_1	Roseibaca calidilacus HL-91	89.8042	0.9704	63.4	79.6806	84.5519	48.9071
Aliiroseovarius halocynthiae MA1_10_1	Roseibaca ekhonensis CECT_7235	90.2768	0.9823	63.33	79.7259	84.6721	48.5254
Aliiroseovarius halocynthiae MA1_10_1	Roseibacterium elongatum DSM_19469	93.3784	0.8332	64.75	78.3985	82.4449	48.8658
Aliiroseovarius halocynthiae MA1_10_1	Roseicitreum antarcticum CGMCC_1.8894	90.5469	0.9217	63.64	79.7813	84.7204	49.3035
Aliiroseovarius halocynthiae MA1_10_1	Roseicyclus mahoneyensis DSM_16097	91.1546	0.85	64.4	81.3625	85.59	49.7829
Aliiroseovarius halocynthiae MA1_10_1	Roseinatronobacter thiooxidans ALG1	90.2768	0.9532	63.61	80.2069	85.2228	48.4411
Aliiroseovarius halocynthiae MA1_10_1	Rubrimonas cliftonensis DSM_15345	87.889	1.337	58	75.373	79.4893	45.7058
Aliiroseovarius halocynthiae MA1_10_1	Silicimonas algicola DSM_103371	92.4375	0.8804	64.41	81.1609	85.17	47.7232
Aliiroseovarius halocynthiae MA1_10_1	Tabrizicola aquatica RCRI19	89.3919	1.025	63.66	80.1022	84.3468	49.9893
Aliiroseovarius halocynthiae MA1_10_1	Thalassobacter stenotrophicus CECT_5294	94.9495	0.8535	65.54	81.3108	86.1609	46.993
Aliiroseovarius halocynthiae MA1_10_1	Thioclava arenosa CAU_1312	91.3957	0.988	65.27	81.7321	85.8071	51.6843
Aliiroseovarius halocynthiae MA1_10_1	Thioclava atlantica 13D2W-2	92.2921	1.0571	64.58	81.8967	85.9725	50.1416
Aliiroseovarius halocynthiae MA1_10_1	Thioclava dalianensis strain_DLFJ1-1	92.7027	1.106	63.78	81.0499	85.4707	49.6481
Aliiroseovarius halocynthiae MA1_10_1	Thioclava electrotropha Elox9	92.1462	1.0827	64.23	81.5983	85.8804	51.2733
Aliiroseovarius halocynthiae MA1_10_1	Thioclava indica strain_DT23-4	92.6401	1.0754	64.39	81.1022	85.8355	49.9635
Aliiroseovarius halocynthiae MA1_10_1	Thioclava marina 11-10-0-13	91.8754	1.0625	64.5	81.8787	86.0341	50.8318
Aliiroseovarius halocynthiae MA1_10_1	Thioclava nitratireducens 25B10_4	91.7004	1.0764	64.37	81.6197	85.8573	50.6722
Aliiroseovarius halocynthiae MA1_10_1	Thioclava pacifica DSM_10166	91.7004	1.0556	64.64	82.0306	86.333	50.8532
Aliiroseovarius halocynthiae MA1_10_1	Thioclava sediminum TAW-CT134	91.7004	1.0785	64.23	81.3189	85.5589	51.0728
Aliiroseovarius halocynthiae MA1_10_1	Tranquillimonas alkanivorans DSM_19547	91.0284	0.8126	66.13	82.2525	86.3948	50.3266
Aliiroseovarius halocynthiae MA1_10_1	Yoonia litorea DSM_29433	93.7796	0.9064	65.74	81.6378	86.5604	47.0386
Aliiroseovarius halocynthiae MA1_10_1	Yoonia maricola DSM_29128	94.3767	0.8728	65.45	81.8265	86.7668	47.562
Aliiroseovarius halocynthiae MA1_10_1	Yoonia maritima DSM_101533	94.3089	0.8348	65.66	82.1208	87.2042	46.3715
Aliiroseovarius halocynthiae MA1_10_1	Yoonia rosea DSM_29591	94.3767	0.8608	66.07	82.116	86.7587	48.8451
Aliiroseovarius halocynthiae MA1_10_1	Yoonia sediminilitoris DSM_29955	94.2334	0.8406	65.64	81.8711	87.0199	47.7008
Aliiroseovarius halocynthiae MA1_10_1	Yoonia tamlensis DSM_26879	92.9102	0.8526	65.59	82.064	87.0633	48.7283
Aliiroseovarius halocynthiae MA1_10_1	Yoonia vestfoldensis DSM_16212	92.5152	0.8986	65.37	81.5234	86.0739	50.261
Aliiroseovarius pelagivivens CECT_8811	Acuticoccus yangtzensis JL1095	86.9771	2.1623	52.38	67.9172	73.61	44.0101
Aliiroseovarius pelagivivens CECT_8811	Ahrensia kielensis DSM_5890	87.8989	2.1551	53.71	66.736	74.4573	35.5181
Aliiroseovarius pelagivivens CECT_8811	Ahrensia marina LZD062	87.4335	2.148	54.2	66.9619	74.3091	37.1198
Aliiroseovarius pelagivivens CECT_8811	Albimonas donghaensis DSM_17890	89.4949	1.2487	59.25	76.1957	80.4964	48.959
Aliiroseovarius pelagivivens CECT_8811	Albimonas pacifica CGMCC_1.11030	90.1828	1.2446	58.92	75.9975	80.2734	48.7865
Aliiroseovarius pelagivivens CECT_8811	Amylibacter kogurei strain_4G11	93.7247	1.0722	62.47	76.8187	84.1362	41.9525
Aliiroseovarius pelagivivens CECT_8811	Boseongicola aestuarii CECT_8489	93.788	0.8457	65.55	81.7387	86.4246	47.9534
Aliiroseovarius pelagivivens CECT_8811	Cereibacter changlensis DSM_18774	90.8294	0.8999	64.76	81.6471	85.5886	52.0589
Aliiroseovarius pelagivivens CECT_8811	Cognatiyoonia koreensis DSM_17925	93.7162	0.8415	65.85	81.5677	86.3781	46.9594
Aliiroseovarius pelagivivens CECT_8811	Cognatiyoonia sediminum DSM_28715	93.3198	0.8923	66.42	80.8308	86.3431	46.2641
Aliiroseovarius pelagivivens CECT_8811	Haematobacter massiliensis CCUG_47968	90.5714	0.9239	63.51	80.8038	84.8864	47.6331
Aliiroseovarius pelagivivens CECT_8811	Haematobacter missouriensis H1892	91.1051	0.9229	63.36	80.4859	84.7145	47.4092
Aliiroseovarius pelagivivens CECT_8811	Hasllibacter halocynthiae DSM_29318	93.3873	1.1088	62.27	77.5226	81.1436	47.1171
Aliiroseovarius pelagivivens CECT_8811	Hwanghaeicola aestuarii DSM_22009	89.466	0.9261	63.54	80.3128	84.1142	46.4439
Aliiroseovarius pelagivivens CECT_8811	Jannaschia aquimarina GSW-M26	92.2402	0.9594	62.98	79.3488	83.4452	48.0104
Aliiroseovarius pelagivivens CECT_8811	Jannaschia donghaensis CECT_7802	93.7332	1.0392	63.58	79.9584	84.6607	49.0948
Aliiroseovarius pelagivivens CECT_8811	Jannaschia faecimaris DSM_100420	93.531	1.0211	63.49	80.0312	84.7873	48.0205
Aliiroseovarius pelagivivens CECT_8811	Jannaschia helgolandensis DSM_14858	93.7205	1.0018	63.49	79.9393	84.4986	48.9932
Aliiroseovarius pelagivivens CECT_8811	Jannaschia pohangensis DSM_19073	94.1296	0.9555	63.61	80.6374	84.938	50.008
Aliiroseovarius pelagivivens CECT_8811	Jannaschia rubra CECT_5088	92.9198	1.021	63.62	80.3206	84.3172	49.0315
Aliiroseovarius pelagivivens CECT_8811	Jannaschia seohaensis DSM_25227	93.4504	0.9372	63.2	80.5405	84.6472	49.8828
Aliiroseovarius pelagivivens CECT_8811	Kandeliimicrobium roseum XY-R6	90.3606	0.8536	65.56	81.6127	85.4775	50.9222
Aliiroseovarius pelagivivens CECT_8811	Leisingera aquaemixtae CECT_8399	92.9682	0.9089	67.49	84.2831	88.0865	54.4843
Aliiroseovarius pelagivivens CECT_8811	Leisingera aquimarina DSM_24565	93.2569	0.9034	67.29	83.8875	87.8595	53.3786
Aliiroseovarius pelagivivens CECT_8811	Leisingera caerulea DSM_24564	93.1034	0.9009	67.54	84.0015	87.9124	54.3132
Aliiroseovarius pelagivivens CECT_8811	Leisingera daeponensis DSM_23529	92.178	0.9079	67.42	84.3834	88.1153	54.5226
Aliiroseovarius pelagivivens CECT_8811	Leisingera methylohalidivorans DSM_14336	93.0593	0.9225	67.42	84.1279	88.0955	53.6454
Aliiroseovarius pelagivivens CECT_8811	Limimaricola cinnabarinus LL-001	92.0892	0.9509	64.33	75.7625	79.6881	47.1748
Aliiroseovarius pelagivivens CECT_8811	Limimaricola hongkongensis DSM_17492	91.8188	0.9013	64.55	80.9599	84.9637	51.1946
Aliiroseovarius pelagivivens CECT_8811	Limimaricola pyoseonensis DSM_21424	91.2779	0.8798	64.38	81.4512	85.2783	51.5954
Aliiroseovarius pelagivivens CECT_8811	Limimaricola soesokkakensis CECT_8367	91.616	0.9278	64.63	81.4176	85.4844	50.8144
Aliiroseovarius pelagivivens CECT_8811	Litoreibacter albidus DSM_26922	93.4007	0.8683	65.61	81.5931	86.7247	49.8433
Aliiroseovarius pelagivivens CECT_8811	Litoreibacter ascidiaceicola DSM_100566	93.7289	0.8495	66.06	81.4447	86.5406	49.9902
Aliiroseovarius pelagivivens CECT_8811	Litoreibacter halocynthiae MA1-10_1	93.3918	0.8529	66.02	81.3944	86.5555	49.6824
Aliiroseovarius pelagivivens CECT_8811	Litoreibacter meonggei DSM_29466	94.3282	0.8488	66.11	81.3972	86.4948	49.5398
Aliiroseovarius pelagivivens CECT_8811	Loktanella atrilutea DSM_29326	92.0892	0.8861	64.23	80.9776	84.9407	50.7556
Aliiroseovarius pelagivivens CECT_8811	Loktanella salsilacus DSM_16199	91.7734	0.8841	64.47	81.0302	85.6032	50.194
Aliiroseovarius pelagivivens CECT_8811	Monaibacterium marinum C7	91.8133	1.0785	61.64	78.1689	83.1976	46.9263
Aliiroseovarius pelagivivens CECT_8811	Neptunicoccus sediminis CY02	93.8803	0.9649	63.09	79.9979	85.1613	47.3213
Aliiroseovarius pelagivivens CECT_8811	Nioella nitratireducens SSW136	93.5091	0.8131	65.74	82.3463	86.6438	52.1514
Aliiroseovarius pelagivivens CECT_8811	Nioella sediminis JS7-11	94.1256	0.7862	66.13	82.2263	86.1681	51.8443
Aliiroseovarius pelagivivens CECT_8811	Oceanicella actignis CGMCC_1.10808	89.0821	1.2018	59.99	76.8263	81.0355	49.6961
Aliiroseovarius pelagivivens CECT_8811	Oceaniglobus indicus 1-19b	91.3921	0.8829	64.93	81.1509	85.4115	51.2721
Aliiroseovarius pelagivivens CECT_8811	Oceaniovalibus guishaninsula JLT2003	92.3752	0.9649	64.35	78.6107	82.5688	49.4675
Aliiroseovarius pelagivivens CECT_8811	Paenirhodobacter enshiensis DW2-9	90.271	1.1017	62.66	80.0963	84.3823	50.9596
Aliiroseovarius pelagivivens CECT_8811	Palleronia abyssalis CECT_8504	92.5726	1.0044	63.49	79.734	84.2224	49.3243
Aliiroseovarius pelagivivens CECT_8811	Palleronia marisminoris CECT_7066	91.6948	1.0018	63.72	80.5278	84.6979	50.3877
Aliiroseovarius pelagivivens CECT_8811	Pararhodobacter aggregans D1-19	91.0991	0.9637	62.77	80.0416	84.1077	51.4814
Aliiroseovarius pelagivivens CECT_8811	Pararhodobacter marinus CIC4N-9	91.0931	0.9488	62.8	80.1195	84.2184	51.7817
Aliiroseovarius pelagivivens CECT_8811	Phaeobacter gallaeciensis DSM_26640	93.0405	0.9202	67.33	83.7524	87.8507	51.0068
Aliiroseovarius pelagivivens CECT_8811	Phaeobacter inhibens DSM_16374	93.0405	0.912	67.19	83.8909	87.963	51.1678
Aliiroseovarius pelagivivens CECT_8811	Phaeobacter italicus CECT_7645	93.6444	0.9015	67.7	83.956	88.0053	52.2825
Aliiroseovarius pelagivivens CECT_8811	Phaeobacter porticola strain_P97	92.8571	0.9293	67.14	83.325	87.6776	50.3285
Aliiroseovarius pelagivivens CECT_8811	Pontivivens insulae CeCT_8812	90.4987	1.0442	61.91	78.8111	83.4679	46.5883
Aliiroseovarius pelagivivens CECT_8811	Pseudophaeobacter arcticus DSM_23566	92.6978	0.9319	66.86	83.3998	87.6465	50.9116
Aliiroseovarius pelagivivens CECT_8811	Pseudophaeobacter leonis 306	91.7116	0.9645	66.67	74.4989	78.1407	45.1639
Aliiroseovarius pelagivivens CECT_8811	Rhodobaca barguzinensis alga05	90.4922	0.9551	63.12	80.1004	85.0944	46.7243
Aliiroseovarius pelagivivens CECT_8811	Rhodovulum kholense DSM_19783	90.5277	0.8199	65.46	82.36	86.1495	52.4943
Aliiroseovarius pelagivivens CECT_8811	Rhodovulum robiginosum DSM_12329	90.9582	0.7964	66.35	82.031	85.9924	51.7017
Aliiroseovarius pelagivivens CECT_8811	Rhodovulum sulfidophilum DSM_1374	91.0014	0.8446	65.84	82.4205	86.3425	52.0313
Aliiroseovarius pelagivivens CECT_8811	Rhodovulum viride JA756	90.3313	0.8214	65.46	82.2743	86.0393	52.3734
Aliiroseovarius pelagivivens CECT_8811	Roseibaca calidilacus HL-91	90.566	0.9732	63.43	79.6441	84.4256	49.217
Aliiroseovarius pelagivivens CECT_8811	Roseibaca ekhonensis CECT_7235	90.7008	0.9851	63.7	79.8406	84.5579	48.9279
Aliiroseovarius pelagivivens CECT_8811	Roseibacterium elongatum DSM_19469	92.9872	0.836	64.75	78.2391	82.2828	49.8056
Aliiroseovarius pelagivivens CECT_8811	Roseicitreum antarcticum CGMCC_1.8894	90.9643	0.9245	63.68	79.751	84.5365	49.8601
Aliiroseovarius pelagivivens CECT_8811	Roseicyclus mahoneyensis DSM_16097	91.9757	0.8529	64.39	81.2918	85.4656	50.7789
Aliiroseovarius pelagivivens CECT_8811	Roseinatronobacter thiooxidans ALG1	90.566	0.956	63.51	80.1089	84.946	48.2272
Aliiroseovarius pelagivivens CECT_8811	Rubrimonas cliftonensis DSM_15345	87.6268	1.3398	57.8	75.4077	79.3693	47.0235
Aliiroseovarius pelagivivens CECT_8811	Silicimonas algicola DSM_103371	92.7175	0.8832	64.28	81.0946	85.0688	48.974
Aliiroseovarius pelagivivens CECT_8811	Tabrizicola aquatica RCRI19	89.7505	1.0279	63.7	80.0174	84.1852	51.0744
Aliiroseovarius pelagivivens CECT_8811	Thalassobacter stenotrophicus CECT_5294	94.3434	0.8564	65.44	81.2609	86.0562	47.605
Aliiroseovarius pelagivivens CECT_8811	Thioclava arenosa CAU_1312	92.4171	0.9908	65.16	81.7391	85.6688	52.7583
Aliiroseovarius pelagivivens CECT_8811	Thioclava atlantica 13D2W-2	92.9006	1.0599	64.46	81.9189	85.9406	51.2044
Aliiroseovarius pelagivivens CECT_8811	Thioclava dalianensis strain_DLFJ1-1	93.1757	1.1089	63.93	80.9579	85.368	50.0802
Aliiroseovarius pelagivivens CECT_8811	Thioclava electrotropha Elox9	92.2973	1.0855	64.14	81.4534	85.7222	52.3574
Aliiroseovarius pelagivivens CECT_8811	Thioclava indica strain_DT23-4	93.1267	1.0782	64.3	81.0966	85.8109	50.322
Aliiroseovarius pelagivivens CECT_8811	Thioclava marina 11-10-0-13	92.1622	1.0653	64.65	81.8973	85.9908	52.1322
Aliiroseovarius pelagivivens CECT_8811	Thioclava nitratireducens 25B10_4	92.1053	1.0792	64.33	81.625	85.8796	51.6099
Aliiroseovarius pelagivivens CECT_8811	Thioclava pacifica DSM_10166	92.1053	1.0585	64.69	82.1183	86.3231	51.8159
Aliiroseovarius pelagivivens CECT_8811	Thioclava sediminum TAW-CT134	92.1053	1.0813	64.09	81.2968	85.5395	52.1178
Aliiroseovarius pelagivivens CECT_8811	Tranquillimonas alkanivorans DSM_19547	91.0415	0.8154	66.13	82.2096	86.1899	51.6673
Aliiroseovarius pelagivivens CECT_8811	Yoonia litorea DSM_29433	93.1895	0.9093	66.07	81.552	86.3453	47.5766
Aliiroseovarius pelagivivens CECT_8811	Yoonia maricola DSM_29128	93.3784	0.8756	65.93	81.5794	86.4593	47.8339
Aliiroseovarius pelagivivens CECT_8811	Yoonia maritima DSM_101533	93.2387	0.8376	65.93	82.1299	87.1609	46.7844
Aliiroseovarius pelagivivens CECT_8811	Yoonia rosea DSM_29591	93.0358	0.8636	65.96	81.9558	86.5805	49.3564
Aliiroseovarius pelagivivens CECT_8811	Yoonia sediminilitoris DSM_29955	92.6978	0.8434	65.83	81.7534	86.8065	48.0618
Aliiroseovarius pelagivivens CECT_8811	Yoonia tamlensis DSM_26879	92.3181	0.8555	65.97	82.0315	86.8575	48.8404
Aliiroseovarius pelagivivens CECT_8811	Yoonia vestfoldensis DSM_16212	91.9192	0.9015	65.36	81.453	85.9598	50.828
Aliiroseovarius sediminilitoris DSM_29439	Acuticoccus yangtzensis JL1095	87.8706	2.1881	52.84	67.5298	73.6328	43.9442
Aliiroseovarius sediminilitoris DSM_29439	Ahrensia kielensis DSM_5890	88.157	2.1809	54.13	66.5228	74.3735	35.101
Aliiroseovarius sediminilitoris DSM_29439	Ahrensia marina LZD062	87.9494	2.1738	54.3	66.7986	74.2565	36.8748
Aliiroseovarius sediminilitoris DSM_29439	Albimonas donghaensis DSM_17890	89.0383	1.2745	59.68	75.6809	80.4742	49.2222
Aliiroseovarius sediminilitoris DSM_29439	Albimonas pacifica CGMCC_1.11030	90.2703	1.2704	59.41	75.5185	80.3195	48.5164
Aliiroseovarius sediminilitoris DSM_29439	Amylibacter kogurei strain_4G11	93.5179	1.098	62.67	76.8591	84.0661	42.1379
Aliiroseovarius sediminilitoris DSM_29439	Boseongicola aestuarii CECT_8489	94.5946	0.8715	65.65	81.564	86.3891	48.0267
Aliiroseovarius sediminilitoris DSM_29439	Brevirhabdus pacifica 22DY15	95.0034	0.8613	66.19	80.3798	84.6303	51.5249
Aliiroseovarius sediminilitoris DSM_29439	Cereibacter changlensis DSM_18774	90.566	0.9257	64.7	81.1662	85.4999	52.0039
Aliiroseovarius sediminilitoris DSM_29439	Cognatiyoonia koreensis DSM_17925	93.9905	0.8674	65.75	81.275	86.154	46.8747
Aliiroseovarius sediminilitoris DSM_29439	Cognatiyoonia sediminum DSM_28715	92.4949	0.9181	65.81	80.4987	86.0672	45.439
Aliiroseovarius sediminilitoris DSM_29439	Dinoroseobacter shibae DFL_12	93.6529	0.8345	66.18	82.4253	86.5755	51.2338
Aliiroseovarius sediminilitoris DSM_29439	Haematobacter massiliensis CCUG_47968	91.2981	0.9498	63.71	80.4771	84.9783	47.995
Aliiroseovarius sediminilitoris DSM_29439	Haematobacter missouriensis H1892	91.79	0.9487	63.51	80.1782	84.7707	47.7126
Aliiroseovarius sediminilitoris DSM_29439	Hasllibacter halocynthiae DSM_29318	94.7903	1.1347	62.2	77.4872	81.6123	47.0926
Aliiroseovarius sediminilitoris DSM_29439	Hwanghaeicola aestuarii DSM_22009	90.0657	0.9519	63.75	79.9249	84.3279	46.7451
Aliiroseovarius sediminilitoris DSM_29439	Jannaschia aquimarina GSW-M26	92.6978	0.9852	63.21	78.8199	83.3674	48.2377
Aliiroseovarius sediminilitoris DSM_29439	Jannaschia donghaensis CECT_7802	93.5223	1.065	63.68	79.6588	84.466	49.7974
Aliiroseovarius sediminilitoris DSM_29439	Jannaschia faecimaris DSM_100420	93.0499	1.047	63.82	79.761	84.7652	48.313
Aliiroseovarius sediminilitoris DSM_29439	Jannaschia helgolandensis DSM_14858	93.9107	1.0276	63.81	79.6528	84.4124	49.4441
Aliiroseovarius sediminilitoris DSM_29439	Jannaschia pohangensis DSM_19073	94.4557	0.9813	64.29	80.4586	84.9668	50.5328
Aliiroseovarius sediminilitoris DSM_29439	Jannaschia rubra CECT_5088	93.712	1.0469	64	80.1316	84.4711	49.568
Aliiroseovarius sediminilitoris DSM_29439	Jannaschia seohaensis DSM_25227	93.6486	0.9631	63.5	80.0895	84.6158	50.0399
Aliiroseovarius sediminilitoris DSM_29439	Kandeliimicrobium roseum XY-R6	91.205	0.8795	66.37	81.4976	85.7402	51.1206
Aliiroseovarius sediminilitoris DSM_29439	Leisingera aquaemixtae CECT_8399	92.9102	0.9347	67.34	83.6843	87.719	54.2899
Aliiroseovarius sediminilitoris DSM_29439	Leisingera aquimarina DSM_24565	93.3063	0.9292	67.74	83.3179	87.4831	52.8665
Aliiroseovarius sediminilitoris DSM_29439	Leisingera caerulea DSM_24564	92.5051	0.9267	67.42	83.4472	87.6153	53.6393
Aliiroseovarius sediminilitoris DSM_29439	Leisingera daeponensis DSM_23529	92.9054	0.9337	67.37	83.8086	87.8109	54.2647
Aliiroseovarius sediminilitoris DSM_29439	Leisingera methylohalidivorans DSM_14336	93.5223	0.9483	67.49	83.5132	87.7576	52.9821
Aliiroseovarius sediminilitoris DSM_29439	Limimaricola cinnabarinus LL-001	92.5051	0.9767	64.7	75.3399	79.6081	47.3609
Aliiroseovarius sediminilitoris DSM_29439	Limimaricola hongkongensis DSM_17492	91.9649	0.9271	65.09	80.641	84.9223	51.6772
Aliiroseovarius sediminilitoris DSM_29439	Limimaricola pyoseonensis DSM_21424	91.3572	0.9056	64.39	81.0867	85.2797	51.4169
Aliiroseovarius sediminilitoris DSM_29439	Limimaricola soesokkakensis CECT_8367	92.235	0.9536	64.8	81.1618	85.6364	51.0893
Aliiroseovarius sediminilitoris DSM_29439	Litoreibacter albidus DSM_26922	94.2127	0.8941	66.16	81.4768	86.7134	48.677
Aliiroseovarius sediminilitoris DSM_29439	Litoreibacter ascidiaceicola DSM_100566	94.7439	0.8753	66.26	81.3523	86.6081	49.3395
Aliiroseovarius sediminilitoris DSM_29439	Litoreibacter halocynthiae MA1-10_1	94.407	0.8787	66.24	81.4209	86.6459	49.2424
Aliiroseovarius sediminilitoris DSM_29439	Litoreibacter janthinus DSM_26921	95.1384	0.8559	66.77	81.4543	86.7069	48.0281
Aliiroseovarius sediminilitoris DSM_29439	Litoreibacter meonggei DSM_29466	96.0081	0.8746	66.23	81.3522	86.6507	48.8326
Aliiroseovarius sediminilitoris DSM_29439	Loktanella atrilutea DSM_29326	91.6329	0.9119	64.08	80.6991	84.8463	51.0649
Aliiroseovarius sediminilitoris DSM_29439	Loktanella fryxellensis DSM_16213	91.6442	0.9213	64.02	80.3531	84.3621	51.2694
Aliiroseovarius sediminilitoris DSM_29439	Loktanella salsilacus DSM_16199	91.8919	0.9099	64.51	80.693	85.3725	50.0685
Aliiroseovarius sediminilitoris DSM_29439	Monaibacterium marinum C7	90.9521	1.1043	61.84	77.7367	83.0891	46.7459
Aliiroseovarius sediminilitoris DSM_29439	Neptunicoccus sediminis CY02	93.9353	0.9908	63.59	79.8399	85.0422	47.5073
Aliiroseovarius sediminilitoris DSM_29439	Nioella nitratireducens SSW136	93.923	0.8389	66.08	82.4016	87.008	52.5973
Aliiroseovarius sediminilitoris DSM_29439	Nioella sediminis JS7-11	94.1853	0.812	66.08	81.892	86.1528	52.3391
Aliiroseovarius sediminilitoris DSM_29439	Oceanicella actignis CGMCC_1.10808	90.2507	1.2276	60.56	76.476	81.1663	49.765
Aliiroseovarius sediminilitoris DSM_29439	Oceaniglobus indicus 1-19b	93.3918	0.9087	65.82	81.0975	85.6996	52.2513
Aliiroseovarius sediminilitoris DSM_29439	Oceaniovalibus guishaninsula JLT2003	92.9587	0.9908	65.15	78.4252	82.696	50.3453
Aliiroseovarius sediminilitoris DSM_29439	Octadecabacter antarcticus 307	93.7332	0.9088	65.27	79.7742	85.3144	46.3787
Aliiroseovarius sediminilitoris DSM_29439	Octadecabacter arcticus 238	94.2606	0.9054	65.67	79.6968	85.3138	46.9486
Aliiroseovarius sediminilitoris DSM_29439	Octadecabacter ascidiaceicola CECT_8868	94.0701	0.8665	65.81	80.8117	86.1481	45.8633
Aliiroseovarius sediminilitoris DSM_29439	Octadecabacter temperatus SB1	92.9245	0.8621	65.76	80.5265	85.9409	45.4305
Aliiroseovarius sediminilitoris DSM_29439	Pacificibacter marinus DSM_25228	94.5381	0.7422	65.46	80.2342	86.6887	44.219
Aliiroseovarius sediminilitoris DSM_29439	Pacificibacter maritimus DSM_104731	94.7404	0.744	65.05	80.2027	86.8564	44.0542
Aliiroseovarius sediminilitoris DSM_29439	Paenirhodobacter enshiensis DW2-9	90.8333	1.1275	62.45	79.8813	84.5604	50.8024
Aliiroseovarius sediminilitoris DSM_29439	Palleronia abyssalis CECT_8504	91.9703	1.0302	63.86	80.0777	84.7691	49.7436
Aliiroseovarius sediminilitoris DSM_29439	Palleronia marisminoris CECT_7066	92.0162	1.0276	63.93	80.1729	84.685	50.5727
Aliiroseovarius sediminilitoris DSM_29439	Pararhodobacter aggregans D1-19	91.3131	0.9895	62.68	79.598	84.232	51.746
Aliiroseovarius sediminilitoris DSM_29439	Pararhodobacter marinus CIC4N-9	92.1569	0.9746	63.07	79.5375	84.1042	52.0336
Aliiroseovarius sediminilitoris DSM_29439	Phaeobacter gallaeciensis DSM_26640	93.5854	0.946	67.69	83.0579	87.3298	50.4162
Aliiroseovarius sediminilitoris DSM_29439	Phaeobacter inhibens DSM_16374	93.5854	0.9379	67.16	83.2018	87.5182	50.6202
Aliiroseovarius sediminilitoris DSM_29439	Phaeobacter italicus CECT_7645	94.1256	0.9273	67.51	83.6083	87.8924	51.287
Aliiroseovarius sediminilitoris DSM_29439	Phaeobacter porticola strain_P97	93.788	0.9552	67.2	82.67	87.1578	49.5438
Aliiroseovarius sediminilitoris DSM_29439	Pontivivens insulae CeCT_8812	90.9953	1.07	61.64	78.405	83.6014	46.7462
Aliiroseovarius sediminilitoris DSM_29439	Pseudophaeobacter arcticus DSM_23566	92.6401	0.9577	66.44	83.3043	87.7843	50.607
Aliiroseovarius sediminilitoris DSM_29439	Pseudophaeobacter leonis 306	92.0999	0.9903	66.37	73.9743	77.8404	44.5842
Aliiroseovarius sediminilitoris DSM_29439	Pseudoroseicyclus aestuarii CECT_9025	91.6273	0.9943	63.39	79.1192	83.2787	49.8149
Aliiroseovarius sediminilitoris DSM_29439	Rhodobaca barguzinensis alga05	90.101	0.9809	63.58	80.0295	85.1565	48.0636
Aliiroseovarius sediminilitoris DSM_29439	Rhodovulum imhoffii DSM_18064	91.498	0.8522	66.53	81.4005	86.0339	49.3528
Aliiroseovarius sediminilitoris DSM_29439	Rhodovulum kholense DSM_19783	91.4922	0.8458	65.62	81.8974	86.1242	52.9969
Aliiroseovarius sediminilitoris DSM_29439	Rhodovulum robiginosum DSM_12329	92.2297	0.8222	66.88	81.8581	86.1119	52.6698
Aliiroseovarius sediminilitoris DSM_29439	Rhodovulum sulfidophilum DSM_1374	92.1675	0.8704	65.73	82.0348	86.3115	52.7989
Aliiroseovarius sediminilitoris DSM_29439	Rhodovulum viride JA756	91.4922	0.8472	65.77	81.791	85.9532	52.9939
Aliiroseovarius sediminilitoris DSM_29439	Roseibaca calidilacus HL-91	89.9731	0.999	63.49	79.5604	84.5446	50.35
Aliiroseovarius sediminilitoris DSM_29439	Roseibaca ekhonensis CECT_7235	89.8385	1.0109	63.75	79.6479	84.6821	50.0507
Aliiroseovarius sediminilitoris DSM_29439	Roseibacterium elongatum DSM_19469	93.607	0.8618	65.04	78.2491	82.3901	50.356
Aliiroseovarius sediminilitoris DSM_29439	Roseicitreum antarcticum CGMCC_1.8894	90.7133	0.9503	64.07	79.6569	84.6692	50.6648
Aliiroseovarius sediminilitoris DSM_29439	Roseicyclus mahoneyensis DSM_16097	91.9246	0.8787	64.65	81.2461	85.5842	51.2548
Aliiroseovarius sediminilitoris DSM_29439	Roseinatronobacter thiooxidans ALG1	90.5114	0.9818	63.98	80.1512	85.1299	49.6886
Aliiroseovarius sediminilitoris DSM_29439	Rubrimonas cliftonensis DSM_15345	87.9973	1.3656	58.27	75.0234	79.6565	47.3757
Aliiroseovarius sediminilitoris DSM_29439	Shimia haliotis DSM_28453	94.5307	0.833	66.78	83.2105	87.8276	50.3024
Aliiroseovarius sediminilitoris DSM_29439	Shimia isoporae SW6_1	93.9824	0.8353	66.51	83.3054	88.1526	47.5301
Aliiroseovarius sediminilitoris DSM_29439	Shimia marina CECT_7688	93.6615	0.8502	67.39	83.3332	87.8195	49.3949
Aliiroseovarius sediminilitoris DSM_29439	Shimia sagamensis JAMH011_1	93.7289	0.8469	67.02	83.0666	87.9594	48.2764
Aliiroseovarius sediminilitoris DSM_29439	Silicimonas algicola DSM_103371	93.1081	0.909	64.91	81.0016	85.211	49.037
Aliiroseovarius sediminilitoris DSM_29439	Tabrizicola aquatica RCRI19	90.303	1.0537	63.9	79.7541	84.2617	50.904
Aliiroseovarius sediminilitoris DSM_29439	Thalassobacter stenotrophicus CECT_5294	94.5344	0.8822	65.36	81.1278	86.181	46.941
Aliiroseovarius sediminilitoris DSM_29439	Thioclava arenosa CAU_1312	92.0999	1.0166	65.48	81.2391	85.587	52.3562
Aliiroseovarius sediminilitoris DSM_29439	Thioclava atlantica 13D2W-2	93.5223	1.0858	64.56	81.7751	86.1631	51.328
Aliiroseovarius sediminilitoris DSM_29439	Thioclava dalianensis strain_DLFJ1-1	93.6615	1.1347	64.34	81.0029	85.7018	50.4667
Aliiroseovarius sediminilitoris DSM_29439	Thioclava electrotropha Elox9	93.1174	1.1113	64.2	81.1671	85.7371	51.822
Aliiroseovarius sediminilitoris DSM_29439	Thioclava indica strain_DT23-4	93.4007	1.1041	64.55	80.7306	85.7565	50.7994
Aliiroseovarius sediminilitoris DSM_29439	Thioclava marina 11-10-0-13	92.915	1.0912	64.5	81.3928	85.8247	51.3168
Aliiroseovarius sediminilitoris DSM_29439	Thioclava nitratireducens 25B10_4	93.3784	1.1051	64.3	81.1786	85.7702	51.2523
Aliiroseovarius sediminilitoris DSM_29439	Thioclava pacifica DSM_10166	93.3108	1.0843	64.55	81.5497	86.1502	51.4529
Aliiroseovarius sediminilitoris DSM_29439	Thioclava sediminum TAW-CT134	93.3784	1.1071	64.23	80.8833	85.4481	51.6115
Aliiroseovarius sediminilitoris DSM_29439	Tranquillimonas alkanivorans DSM_19547	90.625	0.8413	66.11	81.924	86.3184	51.5523
Aliiroseovarius sediminilitoris DSM_29439	Wenxinia marina DSM_24838	92.5	0.9194	64.51	80.2275	84.1004	49.6409
Aliiroseovarius sediminilitoris DSM_29439	Wenxinia saemankumensis DSM_100565	93.0405	0.9428	64.03	80.4041	84.1853	49.8452
Aliiroseovarius sediminilitoris DSM_29439	Yoonia litorea DSM_29433	92.9825	0.9351	66.12	81.7297	86.5655	47.2971
Aliiroseovarius sediminilitoris DSM_29439	Yoonia maricola DSM_29128	94.2606	0.9014	65.76	81.229	86.2322	47.7428
Aliiroseovarius sediminilitoris DSM_29439	Yoonia maritima DSM_101533	93.7205	0.8635	65.76	81.5878	86.7816	45.1506
Aliiroseovarius sediminilitoris DSM_29439	Yoonia rosea DSM_29591	93.8555	0.8894	66.42	81.5657	86.3422	48.9658
Aliiroseovarius sediminilitoris DSM_29439	Yoonia sediminilitoris DSM_29955	93.0452	0.8692	65.57	81.6291	86.6749	48.4457
Aliiroseovarius sediminilitoris DSM_29439	Yoonia tamlensis DSM_26879	93.712	0.8813	65.64	81.6864	86.6504	48.8344
Aliiroseovarius sediminilitoris DSM_29439	Yoonia vestfoldensis DSM_16212	91.7679	0.9273	65.89	81.2847	85.9003	51.8402
Amylibacter kogurei strain_4G11	Acuticoccus yangtzensis JL1095	85.8974	2.0671	52.97	64.8816	73.0333	32.1211
Amylibacter kogurei strain_4G11	Ahrensia kielensis DSM_5890	88.459	2.0599	54.36	65.8544	74.2754	37.7018
Amylibacter kogurei strain_4G11	Ahrensia marina LZD062	87.7252	2.0528	54.67	65.8474	74.1992	37.2152
Amylibacter kogurei strain_4G11	Albimonas donghaensis DSM_17890	88.7542	1.1535	59.28	72.521	79.6525	35.7257
Amylibacter kogurei strain_4G11	Albimonas pacifica CGMCC_1.11030	89.3099	1.1495	58.81	72.1186	79.4194	34.6937
Amylibacter kogurei strain_4G11	Cereibacter changlensis DSM_18774	90.3574	0.9946	61.59	75.3107	82.59	37.4263
Amylibacter kogurei strain_4G11	Cognatiyoonia koreensis DSM_17925	91.4363	1.1459	62.14	76.1463	83.6373	41.1914
Amylibacter kogurei strain_4G11	Cognatiyoonia sediminum DSM_28715	91.8809	1.1967	62.44	76.0386	83.273	41.2069
Amylibacter kogurei strain_4G11	Haematobacter massiliensis CCUG_47968	90.7143	1.0186	60.63	74.6534	82.0466	37.1534
Amylibacter kogurei strain_4G11	Haematobacter missouriensis H1892	91.2399	1.0176	60.48	74.5824	81.9361	37.1523
Amylibacter kogurei strain_4G11	Hwanghaeicola aestuarii DSM_22009	88.1752	1.1143	60.44	73.9948	81.1967	34.5334
Amylibacter kogurei strain_4G11	Jannaschia aquimarina GSW-M26	92.3442	1.1165	60.51	73.6948	80.7555	35.8848
Amylibacter kogurei strain_4G11	Jannaschia donghaensis CECT_7802	92.833	1.1962	61.04	74.5518	81.789	38.5451
Amylibacter kogurei strain_4G11	Jannaschia faecimaris DSM_100420	92.4949	1.1782	61.12	74.8627	82.1088	38.04
Amylibacter kogurei strain_4G11	Jannaschia helgolandensis DSM_14858	92.6829	1.1588	61.06	74.7548	81.8336	39.1126
Amylibacter kogurei strain_4G11	Jannaschia pohangensis DSM_19073	92.7507	1.1125	61.01	74.996	82.1481	38.5039
Amylibacter kogurei strain_4G11	Jannaschia rubra CECT_5088	91.8133	1.1781	60.79	74.4445	81.6412	36.5155
Amylibacter kogurei strain_4G11	Jannaschia seohaensis DSM_25227	92.1356	1.0943	60.57	74.5689	81.9453	36.5135
Amylibacter kogurei strain_4G11	Kandeliimicrobium roseum XY-R6	89.5357	1.0418	62.37	75.1875	82.5073	36.0599
Amylibacter kogurei strain_4G11	Leisingera aquaemixtae CECT_8399	91.2955	1.2132	62.15	76.2271	83.5882	40.3127
Amylibacter kogurei strain_4G11	Leisingera aquimarina DSM_24565	91.4305	1.2078	61.85	75.9865	83.4701	40.9661
Amylibacter kogurei strain_4G11	Leisingera caerulea DSM_24564	91.2955	1.2053	61.9	76.0154	83.477	40.2552
Amylibacter kogurei strain_4G11	Leisingera daeponensis DSM_23529	91.3572	1.2123	62.11	76.3013	83.6464	40.3263
Amylibacter kogurei strain_4G11	Leisingera methylohalidivorans DSM_14336	91.3014	1.2268	62.2	76.1831	83.6899	41.1496
Amylibacter kogurei strain_4G11	Limimaricola cinnabarinus LL-001	90.0743	1.2553	61.7	69.94	76.8244	34.915
Amylibacter kogurei strain_4G11	Limimaricola hongkongensis DSM_17492	89.8717	1.2057	61.94	74.866	82.0233	37.7613
Amylibacter kogurei strain_4G11	Limimaricola pyoseonensis DSM_21424	89.6691	1.1841	61.28	75.091	82.3353	36.0489
Amylibacter kogurei strain_4G11	Limimaricola soesokkakensis CECT_8367	89.8042	1.2321	61.82	75.3504	82.6241	37.1875
Amylibacter kogurei strain_4G11	Litoreibacter albidus DSM_26922	93.5397	1.1727	63.09	77.147	84.3346	41.7755
Amylibacter kogurei strain_4G11	Litoreibacter ascidiaceicola DSM_100566	93.5984	1.1539	63.54	77.0188	84.2385	41.8805
Amylibacter kogurei strain_4G11	Litoreibacter halocynthiae MA1-10_1	93.3288	1.1572	63.25	76.869	84.1551	41.7235
Amylibacter kogurei strain_4G11	Litoreibacter meonggei DSM_29466	94.5873	1.1532	63.21	77.0471	84.1271	41.5954
Amylibacter kogurei strain_4G11	Loktanella atrilutea DSM_29326	89.9392	1.1904	61.52	75.0013	82.2532	37.994
Amylibacter kogurei strain_4G11	Loktanella salsilacus DSM_16199	90.3378	1.1885	61.47	75.5481	82.7085	41.9548
Amylibacter kogurei strain_4G11	Monaibacterium marinum C7	91.6836	0.9834	61.36	75.2578	82.6974	41.7034
Amylibacter kogurei strain_4G11	Neptunicoccus sediminis CY02	94.4707	0.5552	66.46	79.9174	87.0821	45.0372
Amylibacter kogurei strain_4G11	Oceanicella actignis CGMCC_1.10808	89.4003	1.1066	60.32	72.8208	80.1877	36.2867
Amylibacter kogurei strain_4G11	Oceaniglobus indicus 1-19b	90.101	1.0711	61.68	75.2114	82.2759	40.0893
Amylibacter kogurei strain_4G11	Oceaniovalibus guishaninsula JLT2003	91.475	1.1531	61.31	73.0374	80.0346	38.0939
Amylibacter kogurei strain_4G11	Paenirhodobacter enshiensis DW2-9	90.4795	1.1964	60.22	74.2318	81.6486	37.8163
Amylibacter kogurei strain_4G11	Palleronia abyssalis CECT_8504	90.2093	1.1925	60.72	74.291	81.6655	37.2589
Amylibacter kogurei strain_4G11	Palleronia marisminoris CECT_7066	90.2571	1.1899	60.28	74.1723	81.6295	36.2478
Amylibacter kogurei strain_4G11	Pararhodobacter aggregans D1-19	90.762	1.0584	59.72	74.6398	81.8248	38.3481
Amylibacter kogurei strain_4G11	Pararhodobacter marinus CIC4N-9	91.2043	1.0435	60.06	74.5475	81.86	38.9361
Amylibacter kogurei strain_4G11	Phaeobacter gallaeciensis DSM_26640	91.706	1.2246	62.58	76.294	83.5871	41.6873
Amylibacter kogurei strain_4G11	Phaeobacter inhibens DSM_16374	91.9757	1.2164	62.41	76.4277	83.6591	41.9438
Amylibacter kogurei strain_4G11	Phaeobacter italicus CECT_7645	92.4426	1.2059	62.41	76.5169	84.0574	42.0314
Amylibacter kogurei strain_4G11	Phaeobacter porticola strain_P97	92.0324	1.2337	62.61	76.2165	83.5502	42.3097
Amylibacter kogurei strain_4G11	Pontivivens insulae CeCT_8812	91.2779	0.9491	61.17	75.553	82.8113	39.4591
Amylibacter kogurei strain_4G11	Pseudophaeobacter arcticus DSM_23566	91.363	1.2363	61.72	76.2927	83.7975	42.9984
Amylibacter kogurei strain_4G11	Pseudophaeobacter leonis 306	90.4794	1.2688	61.84	67.8028	74.3533	37.8393
Amylibacter kogurei strain_4G11	Rhodobaca barguzinensis alga05	90.1551	1.0498	60.33	75.6082	82.6263	41.3318
Amylibacter kogurei strain_4G11	Rhodovulum kholense DSM_19783	90.8784	1.0081	62.14	75.4395	82.7828	38.4994
Amylibacter kogurei strain_4G11	Rhodovulum sulfidophilum DSM_1374	91.4189	1.0328	62.09	75.4526	82.8671	38.2686
Amylibacter kogurei strain_4G11	Rhodovulum viride JA756	90.682	1.0096	62.13	75.5176	82.8455	38.5817
Amylibacter kogurei strain_4G11	Roseibaca calidilacus HL-91	90.027	1.0679	60.66	75.0874	82.0372	42.0872
Amylibacter kogurei strain_4G11	Roseibaca ekhonensis CECT_7235	90.2965	1.0798	60.58	74.9987	82.1107	41.2729
Amylibacter kogurei strain_4G11	Roseicitreum antarcticum CGMCC_1.8894	91.0991	1.0192	61.27	74.7781	82.0816	40.6439
Amylibacter kogurei strain_4G11	Roseinatronobacter thiooxidans ALG1	89.7643	1.0507	60.81	75.6755	82.697	42.2266
Amylibacter kogurei strain_4G11	Rubrimonas cliftonensis DSM_15345	88.7086	1.2447	57.72	71.69	78.7259	34.1975
Amylibacter kogurei strain_4G11	Tabrizicola aquatica RCRI19	90.0202	1.1226	60.91	74.6815	82.0445	38.1851
Amylibacter kogurei strain_4G11	Thioclava arenosa CAU_1312	91.6836	1.0855	61.66	75.3537	82.7141	39.6137
Amylibacter kogurei strain_4G11	Thioclava atlantica 13D2W-2	92.6351	1.1546	60.88	75.7319	83.0679	38.0577
Amylibacter kogurei strain_4G11	Thioclava dalianensis strain_DLFJ1-1	92.5776	1.2036	60.81	75.305	82.5462	39.8469
Amylibacter kogurei strain_4G11	Thioclava electrotropha Elox9	92.1675	1.1802	60.83	75.1578	82.5262	38.7656
Amylibacter kogurei strain_4G11	Thioclava indica strain_DT23-4	92.6649	1.1729	60.88	75.5035	82.6541	42.357
Amylibacter kogurei strain_4G11	Thioclava marina 11-10-0-13	92.1675	1.16	61.04	75.4173	82.6923	38.5308
Amylibacter kogurei strain_4G11	Thioclava nitratireducens 25B10_4	92.4899	1.1739	61.21	75.2863	82.6455	38.4675
Amylibacter kogurei strain_4G11	Thioclava pacifica DSM_10166	92.6928	1.1532	61.09	75.586	82.9515	38.9304
Amylibacter kogurei strain_4G11	Thioclava sediminum TAW-CT134	92.4899	1.176	60.88	74.9537	82.341	38.7242
Amylibacter kogurei strain_4G11	Tranquillimonas alkanivorans DSM_19547	89.5197	1.0036	62.72	75.521	83.0002	36.4495
Amylibacter kogurei strain_4G11	Yoonia litorea DSM_29433	91.0256	1.2136	62.39	76.291	83.7047	40.8076
Amylibacter kogurei strain_4G11	Yoonia maricola DSM_29128	91.3014	1.18	62.43	76.2117	83.3731	42.7316
Amylibacter kogurei strain_4G11	Yoonia maritima DSM_101533	91.4305	1.142	62.61	76.9976	83.9837	44.0251
Amylibacter kogurei strain_4G11	Yoonia rosea DSM_29591	91.2281	1.168	62.61	76.4875	83.5343	42.7154
Amylibacter kogurei strain_4G11	Yoonia sediminilitoris DSM_29955	91.0931	1.1478	62.48	76.3815	83.6578	42.9554
Amylibacter kogurei strain_4G11	Yoonia tamlensis DSM_26879	90.762	1.1599	62.23	76.9077	83.8661	45.6031
Amylibacter kogurei strain_4G11	Yoonia vestfoldensis DSM_16212	91.2838	1.2058	62.37	75.9402	83.0331	42.4581
Antarctobacter heliothermus DSM_11445	Acuticoccus yangtzensis JL1095	87.0095	2.2854	53.5	67.9397	73.4145	47.7991
Antarctobacter heliothermus DSM_11445	Aestuariivita boseongensis BS-B2	91.1621	0.7111	68.25	84.6209	88.2829	55.4369
Antarctobacter heliothermus DSM_11445	Ahrensia kielensis DSM_5890	85.2197	2.2782	53.8	66.6061	74.0316	34.2996
Antarctobacter heliothermus DSM_11445	Ahrensia marina LZD062	84.8202	2.2711	53.92	66.8893	73.8556	36.7847
Antarctobacter heliothermus DSM_11445	Albimonas donghaensis DSM_17890	88.4537	1.3718	59.52	76.4429	80.4914	53.7603
Antarctobacter heliothermus DSM_11445	Albimonas pacifica CGMCC_1.11030	89.5522	1.3677	59.54	76.0948	80.2499	53.4935
Antarctobacter heliothermus DSM_11445	Aliiroseovarius crassostreae CV919-312	92.4949	0.8779	64.88	82.3922	86.5718	51.9609
Antarctobacter heliothermus DSM_11445	Aliiroseovarius halocynthiae MA1_10_1	93.7542	0.8881	65.82	82.2662	86.8568	50.5295
Antarctobacter heliothermus DSM_11445	Aliiroseovarius pelagivivens CECT_8811	93.7712	0.891	65.48	82.2059	86.61	51.3118
Antarctobacter heliothermus DSM_11445	Aliiroseovarius sediminilitoris DSM_29439	92.2973	0.9168	65.97	81.9239	86.5301	51.7633
Antarctobacter heliothermus DSM_11445	Amylibacter kogurei strain_4G11	90.1351	1.1953	61.47	75.5045	82.9769	40.9742
Antarctobacter heliothermus DSM_11445	Aquimixticola soesokkakensis CECT_8620	92.7359	0.9084	64.13	81.6143	86.0935	52.952
Antarctobacter heliothermus DSM_11445	Ascidiaceihabitans donghaensis CECT_8599	94.9084	0.8004	66.83	81.6976	87.4121	47.8949
Antarctobacter heliothermus DSM_11445	Boseongicola aestuarii CECT_8489	91.8864	0.9689	65.11	81.7005	86.3261	49.3183
Antarctobacter heliothermus DSM_11445	Brevirhabdus pacifica 22DY15	91.8022	0.9586	66.16	80.8835	84.572	55.6241
Antarctobacter heliothermus DSM_11445	Cereibacter changlensis DSM_18774	90.1961	1.0231	64.08	81.619	85.4576	56.8349
Antarctobacter heliothermus DSM_11445	Cognatishimia maritima DSM_28223	92.6829	0.7543	66.74	83.1843	87.7783	49.9305
Antarctobacter heliothermus DSM_11445	Cognatiyoonia koreensis DSM_17925	91.8644	0.9191	65.49	81.6602	86.2981	48.5741
Antarctobacter heliothermus DSM_11445	Cognatiyoonia sediminum DSM_28715	91.9431	0.9699	65.27	80.4967	85.9242	46.1608
Antarctobacter heliothermus DSM_11445	Cribrihabitans marinus DSM_29340	91.1864	0.7774	68.57	84.359	87.8239	58.592
Antarctobacter heliothermus DSM_11445	Dinoroseobacter shibae DFL_12	93.1386	0.9318	65.95	82.6081	86.3085	55.3442
Antarctobacter heliothermus DSM_11445	Donghicola eburneus DSM_29127	92.5424	0.7358	66.32	83.2648	87.522	52.1357
Antarctobacter heliothermus DSM_11445	Donghicola tyrosinivorans DSM_100212	90.7682	0.7333	66.48	83.4359	87.3702	53.3655
Antarctobacter heliothermus DSM_11445	Flavimaricola marinus CECT_8899	90.7984	0.8651	65.54	82.1988	86.4673	53.2063
Antarctobacter heliothermus DSM_11445	Haematobacter massiliensis CCUG_47968	89.5415	1.0471	63.02	80.8901	84.7613	51.5343
Antarctobacter heliothermus DSM_11445	Haematobacter missouriensis H1892	90	1.0461	62.87	80.6457	84.5513	50.9644
Antarctobacter heliothermus DSM_11445	Halocynthiibacter arcticus PAMC_20958	92.1159	0.9601	63.78	77.3969	82.9943	42.4244
Antarctobacter heliothermus DSM_11445	Halocynthiibacter namhaensis RA2-3	92.0946	0.9385	64.2	79.8061	85.2859	44.0516
Antarctobacter heliothermus DSM_11445	Hasllibacter halocynthiae DSM_29318	92.3442	1.232	62.63	78.2496	81.7786	51.6446
Antarctobacter heliothermus DSM_11445	Hwanghaeicola aestuarii DSM_22009	88.5378	1.0493	63.72	81.0083	84.6482	50.8878
Antarctobacter heliothermus DSM_11445	Jannaschia aquimarina GSW-M26	90.3989	1.0826	63.28	80.043	83.9094	52.2644
Antarctobacter heliothermus DSM_11445	Jannaschia donghaensis CECT_7802	91.1606	1.1623	63.59	80.1814	84.597	53.2052
Antarctobacter heliothermus DSM_11445	Jannaschia faecimaris DSM_100420	90.8232	1.1443	64.14	80.4982	85.1446	51.6698
Antarctobacter heliothermus DSM_11445	Jannaschia helgolandensis DSM_14858	91.0074	1.1249	64.16	80.4129	84.8064	52.743
Antarctobacter heliothermus DSM_11445	Jannaschia pohangensis DSM_19073	91.616	1.0786	64.2	81.1734	85.2982	54.9684
Antarctobacter heliothermus DSM_11445	Jannaschia rubra CECT_5088	91.2162	1.1442	63.96	80.8113	84.5624	54.2553
Antarctobacter heliothermus DSM_11445	Jannaschia seohaensis DSM_25227	92.0162	1.0604	64.04	81.329	85.1997	55.3041
Antarctobacter heliothermus DSM_11445	Jhaorihella thermophila DSM_23413	89.4237	0.8085	68.02	83.8696	87.576	57.7701
Antarctobacter heliothermus DSM_11445	Kandeliimicrobium roseum XY-R6	89.9861	0.9768	65.7	82.1141	85.8278	56.3994
Antarctobacter heliothermus DSM_11445	Leisingera aquaemixtae CECT_8399	92.4695	0.9101	67.14	84.0978	87.7954	58.3057
Antarctobacter heliothermus DSM_11445	Leisingera aquimarina DSM_24565	92.6202	0.9047	66.97	83.5284	87.5031	56.2476
Antarctobacter heliothermus DSM_11445	Leisingera caerulea DSM_24564	92.2712	0.9021	67.06	83.8228	87.661	57.6469
Antarctobacter heliothermus DSM_11445	Leisingera daeponensis DSM_23529	91.6836	0.9092	67.17	84.3216	87.9355	58.276
Antarctobacter heliothermus DSM_11445	Leisingera methylohalidivorans DSM_14336	92.3025	0.9237	67.47	83.8833	87.7245	57.0179
Antarctobacter heliothermus DSM_11445	Limimaricola cinnabarinus LL-001	91.384	1.0285	65.01	76.76	80.3866	52.1586
Antarctobacter heliothermus DSM_11445	Limimaricola hongkongensis DSM_17492	91.5082	0.9789	65.1	82.0872	85.7661	56.918
Antarctobacter heliothermus DSM_11445	Limimaricola pyoseonensis DSM_21424	90.7056	0.9573	64.74	82.3649	86.0244	57.5527
Antarctobacter heliothermus DSM_11445	Limimaricola soesokkakensis CECT_8367	91.2483	1.0053	64.89	82.3731	86.2152	56.1629
Antarctobacter heliothermus DSM_11445	Litoreibacter albidus DSM_26922	91.2779	0.9459	65.06	80.8221	85.812	50.3225
Antarctobacter heliothermus DSM_11445	Litoreibacter arenae DSM_19593	91.954	0.8875	65.41	81.4617	85.9501	52.9248
Antarctobacter heliothermus DSM_11445	Litoreibacter ascidiaceicola DSM_100566	91.0751	0.9271	65.16	80.9547	85.8776	50.4642
Antarctobacter heliothermus DSM_11445	Litoreibacter halocynthiae MA1-10_1	91.5369	0.9304	64.97	81.0328	85.8292	50.0613
Antarctobacter heliothermus DSM_11445	Litoreibacter janthinus DSM_26921	91.5541	0.9076	65.52	80.9971	86.0267	48.4056
Antarctobacter heliothermus DSM_11445	Litoreibacter meonggei DSM_29466	91.8133	0.9264	65.13	80.7831	85.8285	49.9468
Antarctobacter heliothermus DSM_11445	Litoreibacter ponti DSM_100977	91.6723	0.8703	64.96	82.2057	86.2207	54.2518
Antarctobacter heliothermus DSM_11445	Litorimicrobium taeanense DSM_22007	91.5483	0.7113	68.28	84.2618	88.1652	55.5647
Antarctobacter heliothermus DSM_11445	Loktanella atrilutea DSM_29326	91.4576	0.9636	64.5	81.8519	85.639	55.7537
Antarctobacter heliothermus DSM_11445	Loktanella fryxellensis DSM_16213	90.9276	0.9731	65.37	81.4347	85.0542	56.032
Antarctobacter heliothermus DSM_11445	Loktanella salsilacus DSM_16199	90.6018	0.9617	65.01	81.5126	85.9379	53.1376
Antarctobacter heliothermus DSM_11445	Marinibacterium profundimaris 22II1-22F33	91.7176	0.8348	67.16	83.7602	87.3819	58.2167
Antarctobacter heliothermus DSM_11445	Marinovum algicola FF3	92.1356	0.6539	68.96	85.1083	88.3201	58.8747
Antarctobacter heliothermus DSM_11445	Maritimibacter alkaliphilus HTCC2654	92.0839	0.8992	65.05	82.5291	86.4875	55.2532
Antarctobacter heliothermus DSM_11445	Marivita cryptomonadis CL-SK44	91.4576	0.5814	70.54	85.914	89.7363	54.3724
Antarctobacter heliothermus DSM_11445	Marivita geojedonensis DPG-138	91.9322	0.5594	70.53	86.1866	89.5963	55.0896
Antarctobacter heliothermus DSM_11445	Marivita hallyeonensis DSM_29431	91.4576	0.5601	70	85.7812	89.6682	53.5347
Antarctobacter heliothermus DSM_11445	Marivivens niveibacter MCCC_1A06712	90.2027	0.892	64.96	81.6892	86.808	48.2179
Antarctobacter heliothermus DSM_11445	Monaibacterium marinum C7	90.8412	1.2016	61.35	78.0427	83.0346	49.022
Antarctobacter heliothermus DSM_11445	Neptunicoccus sediminis CY02	90.6397	1.0881	62.14	79.2758	84.2094	48.1754
Antarctobacter heliothermus DSM_11445	Nereida ignava CECT_5292	90.5277	0.8829	65.75	80.5865	86.0363	43.7908
Antarctobacter heliothermus DSM_11445	Nioella nitratireducens SSW136	91.8022	0.9362	65.13	82.6593	86.6269	55.9594
Antarctobacter heliothermus DSM_11445	Nioella sediminis JS7-11	92.2921	0.9093	65.34	82.3952	85.9941	55.6549
Antarctobacter heliothermus DSM_11445	Oceanicella actignis CGMCC_1.10808	88.4482	1.3249	61.14	76.9394	80.8825	54.281
Antarctobacter heliothermus DSM_11445	Oceaniglobus indicus 1-19b	90.6945	1.006	65.65	81.6168	85.6996	55.434
Antarctobacter heliothermus DSM_11445	Oceaniovalibus guishaninsula JLT2003	91.0074	1.0881	65.22	79.6292	83.268	54.4315
Antarctobacter heliothermus DSM_11445	Octadecabacter antarcticus 307	91.272	0.9606	65.24	80.2293	85.2282	47.2941
Antarctobacter heliothermus DSM_11445	Octadecabacter arcticus 238	91.2281	0.9572	65.94	80.2579	85.2732	47.7625
Antarctobacter heliothermus DSM_11445	Octadecabacter ascidiaceicola CECT_8868	91.1367	0.9182	65.34	81.0124	85.8326	46.3666
Antarctobacter heliothermus DSM_11445	Octadecabacter temperatus SB1	90.7307	0.9138	65.46	80.9116	85.6846	45.5369
Antarctobacter heliothermus DSM_11445	Pacificibacter marinus DSM_25228	92.0732	0.9554	63.8	79.4794	85.9057	43.4894
Antarctobacter heliothermus DSM_11445	Pacificibacter maritimus DSM_104731	92.0732	0.9572	63.62	79.2833	85.9223	43.346
Antarctobacter heliothermus DSM_11445	Paenirhodobacter enshiensis DW2-9	89.8258	1.2248	62.13	79.9755	84.1287	55.1063
Antarctobacter heliothermus DSM_11445	Palleronia abyssalis CECT_8504	91.322	1.1275	64.07	80.6471	84.846	52.9903
Antarctobacter heliothermus DSM_11445	Palleronia marisminoris CECT_7066	90.5277	1.1249	63.84	81.0805	85.1902	54.4769
Antarctobacter heliothermus DSM_11445	Pararhodobacter aggregans D1-19	90.1961	1.0869	62.55	80.4932	84.1636	56.3282
Antarctobacter heliothermus DSM_11445	Pararhodobacter marinus CIC4N-9	90.1218	1.072	62.62	80.4956	84.2469	55.3215
Antarctobacter heliothermus DSM_11445	Phaeobacter gallaeciensis DSM_26640	93.2203	0.9214	67.58	83.6276	87.7158	53.3172
Antarctobacter heliothermus DSM_11445	Phaeobacter inhibens DSM_16374	92.9492	0.9133	66.91	83.6193	87.7588	53.6081
Antarctobacter heliothermus DSM_11445	Phaeobacter italicus CECT_7645	92.663	0.9027	67.08	83.814	87.773	54.301
Antarctobacter heliothermus DSM_11445	Phaeobacter porticola strain_P97	92.7752	0.9306	67.1	83.3809	87.6785	52.6501
Antarctobacter heliothermus DSM_11445	Planktomarina temperata RCA23	92.2764	0.9715	64.08	78.6542	84.7739	44.2011
Antarctobacter heliothermus DSM_11445	Planktotalea arctica IMCC9565	92.2611	0.7917	67.46	82.8441	87.3811	49.2738
Antarctobacter heliothermus DSM_11445	Planktotalea frisia SH6-1	92.4375	0.803	66.66	81.7805	87.2064	44.9384
Antarctobacter heliothermus DSM_11445	Pontivivens insulae CeCT_8812	89.5199	1.1674	61.08	78.6094	83.1827	48.3545
Antarctobacter heliothermus DSM_11445	Poseidonocella pacifica DSM_29316	93.4827	0.7483	67.5	82.5869	86.7117	50.6445
Antarctobacter heliothermus DSM_11445	Poseidonocella sedimentorum KMM_9023	92.1516	0.7562	67.48	83.2792	86.8812	55.0132
Antarctobacter heliothermus DSM_11445	Pseudaestuariivita atlantica 22II-S11-z3	92.1356	0.7172	67.01	84.1751	87.6549	57.5616
Antarctobacter heliothermus DSM_11445	Pseudodonghicola xiamenensis DSM_18339	92.9321	0.8007	66.8	84.0025	87.8502	56.6702
Antarctobacter heliothermus DSM_11445	Pseudooctadecabacter jejudonensis CECT_8397	91.3396	0.8611	65.88	81.4867	86.1155	51.6892
Antarctobacter heliothermus DSM_11445	Pseudopelagicola gijangensis DSM_100564	93.8514	0.7691	67.36	82.8123	87.8119	49.1765
Antarctobacter heliothermus DSM_11445	Pseudophaeobacter arcticus DSM_23566	92.9444	0.9332	66.51	83.006	87.2501	53.1857
Antarctobacter heliothermus DSM_11445	Pseudophaeobacter leonis 306	91.8298	0.9657	66.18	73.9179	77.4775	46.9961
Antarctobacter heliothermus DSM_11445	Pseudoroseicyclus aestuarii CECT_9025	90.8412	1.046	63.85	80.6272	84.0361	55.8588
Antarctobacter heliothermus DSM_11445	Puniceibacterium antarcticum SM1211	92.7556	0.6154	69.4	85.1208	88.7246	56.4711
Antarctobacter heliothermus DSM_11445	Puniceibacterium sediminis DSM_29052	92.7027	0.611	70.4	85.6883	89.0875	56.8136
Antarctobacter heliothermus DSM_11445	Rhodobaca barguzinensis alga05	90.1961	1.0782	63.82	80.5375	85.1924	49.156
Antarctobacter heliothermus DSM_11445	Rhodosalinus sediminis WDN1C137	88.7616	0.8611	68.12	82.6983	85.9181	55.753
Antarctobacter heliothermus DSM_11445	Rhodovulum imhoffii DSM_18064	89.7696	0.9495	67.36	81.6248	85.5257	51.7982
Antarctobacter heliothermus DSM_11445	Rhodovulum kholense DSM_19783	89.9051	0.9431	65.63	82.4067	85.9609	56.8426
Antarctobacter heliothermus DSM_11445	Rhodovulum robiginosum DSM_12329	89.5805	0.9196	67.39	82.3438	85.9544	56.6022
Antarctobacter heliothermus DSM_11445	Rhodovulum sulfidophilum DSM_1374	90.2439	0.9678	65.47	82.3764	85.9661	56.4127
Antarctobacter heliothermus DSM_11445	Rhodovulum viride JA756	89.9661	0.9445	65.73	82.4408	85.969	56.8732
Antarctobacter heliothermus DSM_11445	Roseibaca calidilacus HL-91	90.8599	1.0963	64.04	80.0128	84.7991	52.2581
Antarctobacter heliothermus DSM_11445	Roseibaca ekhonensis CECT_7235	90.1151	1.1082	65.65	80.0128	84.6005	51.9607
Antarctobacter heliothermus DSM_11445	Roseibacterium elongatum DSM_19469	92.0785	0.9592	65.32	79.1078	82.8508	54.6499
Antarctobacter heliothermus DSM_11445	Roseicitreum antarcticum CGMCC_1.8894	90.0609	1.0477	64.68	80.594	84.7729	53.5771
Antarctobacter heliothermus DSM_11445	Roseicyclus mahoneyensis DSM_16097	91.0811	0.976	65.26	82.3886	86.2262	55.9901
Antarctobacter heliothermus DSM_11445	Roseinatronobacter thiooxidans ALG1	90.2637	1.0792	63.84	80.5751	85.1468	51.0518
Antarctobacter heliothermus DSM_11445	Roseisalinus antarcticus CECT_7023	90.6441	0.9385	67.64	82.7568	86.3834	56.399
Antarctobacter heliothermus DSM_11445	Roseobacter denitrificans OCh_114_DSM_7001	91.954	0.8306	67.09	82.7192	87.0145	51.3066
Antarctobacter heliothermus DSM_11445	Roseobacter litoralis Och_149	92.2921	0.8202	66.89	82.9663	87.4546	49.804
Antarctobacter heliothermus DSM_11445	Rubrimonas cliftonensis DSM_15345	88.1911	1.4629	58.6	75.5821	79.4771	51.9661
Antarctobacter heliothermus DSM_11445	Salinihabitans flavidus DSM_27842	91.9377	0.7582	67.85	84.3805	88.0136	54.7913
Antarctobacter heliothermus DSM_11445	Sedimentitalea nanhaiensis DSM_24252	92.2764	0.7706	67.73	83.2361	87.4475	55.6164
Antarctobacter heliothermus DSM_11445	Sediminimonas qiaohouensis DSM_21189	90.9459	0.8035	67.77	82.2982	86.2795	55.2938
Antarctobacter heliothermus DSM_11445	Shimia abyssi DSM_100673	92.4068	0.8007	66.92	83.0361	87.6829	49.9991
Antarctobacter heliothermus DSM_11445	Shimia aestuarii DSM_15283	92.678	0.76	67.96	84.2435	88.1518	54.7015
Antarctobacter heliothermus DSM_11445	Shimia haliotis DSM_28453	92.339	0.8084	67.21	83.127	87.4699	51.7947
Antarctobacter heliothermus DSM_11445	Shimia isoporae SW6_1	92.0108	0.8107	66.73	82.9553	87.5542	48.624
Antarctobacter heliothermus DSM_11445	Shimia marina CECT_7688	92.4119	0.8257	67.13	83.0542	87.0519	50.5675
Antarctobacter heliothermus DSM_11445	Shimia sagamensis JAMH011_1	92.0162	0.8223	66.37	82.9194	87.498	49.1838
Antarctobacter heliothermus DSM_11445	Silicimonas algicola DSM_103371	91.1427	1.0063	65.02	81.5478	85.637	53.432
Antarctobacter heliothermus DSM_11445	Tabrizicola aquatica RCRI19	90.0541	1.151	64.02	80.2375	84.4559	55.0211
Antarctobacter heliothermus DSM_11445	Thalassobacter stenotrophicus CECT_5294	91.9083	0.9795	65.11	81.2183	85.9151	49.0277
Antarctobacter heliothermus DSM_11445	Thioclava arenosa CAU_1312	90.4342	1.1139	64.73	81.5458	85.4422	55.4605
Antarctobacter heliothermus DSM_11445	Thioclava atlantica 13D2W-2	91.0014	1.1831	63.71	81.7248	85.6902	54.8274
Antarctobacter heliothermus DSM_11445	Thioclava dalianensis strain_DLFJ1-1	90.5341	1.232	63.21	80.8788	85.1076	52.861
Antarctobacter heliothermus DSM_11445	Thioclava electrotropha Elox9	90.7921	1.2087	63.55	81.6433	85.5492	54.5058
Antarctobacter heliothermus DSM_11445	Thioclava indica strain_DT23-4	90.7495	1.2014	63.35	80.8273	85.5139	52.6043
Antarctobacter heliothermus DSM_11445	Thioclava marina 11-10-0-13	90.2505	1.1885	63.64	81.5771	85.5528	54.1898
Antarctobacter heliothermus DSM_11445	Thioclava nitratireducens 25B10_4	90.4794	1.2024	63.58	81.703	85.6524	54.2432
Antarctobacter heliothermus DSM_11445	Thioclava pacifica DSM_10166	89.9392	1.1816	63.81	81.9785	85.9683	54.1372
Antarctobacter heliothermus DSM_11445	Thioclava sediminum TAW-CT134	90.4794	1.2044	63.35	81.3645	85.2939	54.4272
Antarctobacter heliothermus DSM_11445	Tranquillimonas alkanivorans DSM_19547	89.7661	0.9386	66.03	82.9553	86.5738	56.0282
Antarctobacter heliothermus DSM_11445	Wenxinia marina DSM_24838	91.0811	0.9711	65.19	81.9303	85.322	55.9153
Antarctobacter heliothermus DSM_11445	Wenxinia saemankumensis DSM_100565	91.6216	0.9945	64.24	81.8861	85.1375	55.54
Antarctobacter heliothermus DSM_11445	Yoonia litorea DSM_29433	92.0785	0.9868	66.18	81.6567	86.2327	48.7577
Antarctobacter heliothermus DSM_11445	Yoonia maricola DSM_29128	92.2712	0.9532	65.81	81.5126	86.281	48.5153
Antarctobacter heliothermus DSM_11445	Yoonia maritima DSM_101533	91.8589	0.9152	65.61	81.7148	86.7825	45.0339
Antarctobacter heliothermus DSM_11445	Yoonia rosea DSM_29591	92.0624	0.9412	66.16	82.279	86.6638	50.8032
Antarctobacter heliothermus DSM_11445	Yoonia sediminilitoris DSM_29955	92.5951	0.921	65.81	81.8979	86.7086	50.2852
Antarctobacter heliothermus DSM_11445	Yoonia tamlensis DSM_26879	91.4865	0.933	65.72	82.021	86.6601	50.1052
Antarctobacter heliothermus DSM_11445	Yoonia vestfoldensis DSM_16212	91.2897	0.979	66.66	82.105	86.1492	54.6258
Aquimixticola soesokkakensis CECT_8620	Acuticoccus yangtzensis JL1095	87.8296	2.1797	52.47	68.0859	73.6786	45.8722
Aquimixticola soesokkakensis CECT_8620	Ahrensia kielensis DSM_5890	87.3502	2.1725	53.29	66.7983	74.2646	35.0345
Aquimixticola soesokkakensis CECT_8620	Ahrensia marina LZD062	87.4084	2.1654	53.47	67.057	74.2119	37.1623
Aquimixticola soesokkakensis CECT_8620	Albimonas donghaensis DSM_17890	90.4184	1.2661	58.95	75.9995	80.4233	50.6325
Aquimixticola soesokkakensis CECT_8620	Albimonas pacifica CGMCC_1.11030	91.5932	1.262	58.87	75.6777	80.2179	50.9357
Aquimixticola soesokkakensis CECT_8620	Aliiroseovarius crassostreae CV919-312	94.2529	0.6564	65.64	82.3426	86.7445	51.3567
Aquimixticola soesokkakensis CECT_8620	Aliiroseovarius halocynthiae MA1_10_1	93.962	0.6665	65.5	82.0874	86.8173	49.7073
Aquimixticola soesokkakensis CECT_8620	Aliiroseovarius pelagivivens CECT_8811	92.7605	0.6694	65.64	82.0267	86.7661	50.6256
Aquimixticola soesokkakensis CECT_8620	Aliiroseovarius sediminilitoris DSM_29439	94.5946	0.6952	65.57	81.6601	86.5474	50.6376
Aquimixticola soesokkakensis CECT_8620	Amylibacter kogurei strain_4G11	92.37	1.0896	61.45	76.0571	83.3496	42.3624
Aquimixticola soesokkakensis CECT_8620	Ascidiaceihabitans donghaensis CECT_8599	94.2412	0.8166	63.93	80.4976	86.1797	47.6035
Aquimixticola soesokkakensis CECT_8620	Boseongicola aestuarii CECT_8489	93.5135	0.8631	64.43	81.263	86.084	48.7237
Aquimixticola soesokkakensis CECT_8620	Brevirhabdus pacifica 22DY15	93.6357	0.8529	65.31	80.624	84.321	52.8797
Aquimixticola soesokkakensis CECT_8620	Cereibacter changlensis DSM_18774	91.3455	0.9173	64.41	81.5441	85.6	54.2123
Aquimixticola soesokkakensis CECT_8620	Cognatiyoonia koreensis DSM_17925	93.3604	0.859	64.37	81.0974	85.9249	47.6716
Aquimixticola soesokkakensis CECT_8620	Cognatiyoonia sediminum DSM_28715	92.7605	0.9097	64.64	79.9329	85.4287	45.5625
Aquimixticola soesokkakensis CECT_8620	Cribrihabitans marinus DSM_29340	93.9024	0.7936	64.75	82.0766	85.9836	53.9159
Aquimixticola soesokkakensis CECT_8620	Dinoroseobacter shibae DFL_12	92.3286	0.8261	64.7	81.6358	85.642	52.5254
Aquimixticola soesokkakensis CECT_8620	Flavimaricola marinus CECT_8899	92.0946	0.805	64.5	81.3037	85.7731	51.1027
Aquimixticola soesokkakensis CECT_8620	Haematobacter massiliensis CCUG_47968	91.1238	0.9413	63.37	81.0827	85.1774	49.8192
Aquimixticola soesokkakensis CECT_8620	Haematobacter missouriensis H1892	91.6273	0.9403	63.4	80.7617	84.9884	49.469
Aquimixticola soesokkakensis CECT_8620	Hasllibacter halocynthiae DSM_29318	93.4959	1.1262	61.68	77.4061	81.3012	48.9262
Aquimixticola soesokkakensis CECT_8620	Hwanghaeicola aestuarii DSM_22009	91.2628	0.9435	63.25	80.246	84.1947	49.2142
Aquimixticola soesokkakensis CECT_8620	Jannaschia aquimarina GSW-M26	91.8133	0.9768	62.11	79.0465	83.2106	49.4118
Aquimixticola soesokkakensis CECT_8620	Jannaschia donghaensis CECT_7802	92.4426	1.0566	63.02	79.5012	84.2393	50.7669
Aquimixticola soesokkakensis CECT_8620	Jannaschia faecimaris DSM_100420	92.1053	1.0385	62.89	79.8039	84.6432	49.0655
Aquimixticola soesokkakensis CECT_8620	Jannaschia helgolandensis DSM_14858	93.3694	1.0192	62.7	79.5311	84.3178	50.2295
Aquimixticola soesokkakensis CECT_8620	Jannaschia pohangensis DSM_19073	93.3694	0.9729	63.31	80.4597	84.7959	51.9221
Aquimixticola soesokkakensis CECT_8620	Jannaschia rubra CECT_5088	93.1081	1.0384	62.87	79.9713	84.1651	50.9074
Aquimixticola soesokkakensis CECT_8620	Jannaschia seohaensis DSM_25227	92.833	0.9547	62.44	80.044	84.3859	51.7446
Aquimixticola soesokkakensis CECT_8620	Jhaorihella thermophila DSM_23413	90.9214	0.8247	64.89	81.7962	85.8842	53.5948
Aquimixticola soesokkakensis CECT_8620	Kandeliimicrobium roseum XY-R6	91.1806	0.8711	65.28	81.8543	85.765	53.0648
Aquimixticola soesokkakensis CECT_8620	Leisingera aquaemixtae CECT_8399	93.6992	0.9263	64.68	82.3699	86.3085	54.4227
Aquimixticola soesokkakensis CECT_8620	Leisingera aquimarina DSM_24565	93.2387	0.9208	64.45	81.9993	86.2085	52.5648
Aquimixticola soesokkakensis CECT_8620	Leisingera caerulea DSM_24564	93.4282	0.9183	64.62	82.1047	86.2228	53.5541
Aquimixticola soesokkakensis CECT_8620	Leisingera daeponensis DSM_23529	93.4459	0.9253	64.62	82.4649	86.3707	54.3375
Aquimixticola soesokkakensis CECT_8620	Leisingera methylohalidivorans DSM_14336	93.3198	0.9399	64.84	82.2777	86.3603	53.32
Aquimixticola soesokkakensis CECT_8620	Limimaricola cinnabarinus LL-001	94.3767	0.9683	64.21	75.8722	79.7498	49.9255
Aquimixticola soesokkakensis CECT_8620	Limimaricola hongkongensis DSM_17492	94.5726	0.9187	64.76	81.18	85.112	54.5882
Aquimixticola soesokkakensis CECT_8620	Limimaricola pyoseonensis DSM_21424	93.0217	0.8972	64.41	81.5111	85.3333	54.1145
Aquimixticola soesokkakensis CECT_8620	Limimaricola soesokkakensis CECT_8367	94.3767	0.9452	64.86	81.6723	85.5987	53.8509
Aquimixticola soesokkakensis CECT_8620	Litoreibacter albidus DSM_26922	93.7162	0.8857	63.84	80.9951	86.1894	49.968
Aquimixticola soesokkakensis CECT_8620	Litoreibacter arenae DSM_19593	93.923	0.8273	64.73	81.4654	86.2559	51.862
Aquimixticola soesokkakensis CECT_8620	Litoreibacter ascidiaceicola DSM_100566	93.7162	0.8669	64.49	80.9446	86.0494	49.897
Aquimixticola soesokkakensis CECT_8620	Litoreibacter halocynthiae MA1-10_1	94.6549	0.8703	64.39	80.9649	86.0772	49.7211
Aquimixticola soesokkakensis CECT_8620	Litoreibacter janthinus DSM_26921	93.4459	0.8474	64.49	80.8206	86.0512	48.7704
Aquimixticola soesokkakensis CECT_8620	Litoreibacter meonggei DSM_29466	95.1253	0.8662	64.27	80.7912	85.9588	49.5796
Aquimixticola soesokkakensis CECT_8620	Litoreibacter ponti DSM_100977	94.2412	0.8102	64.21	81.9098	86.1573	52.7237
Aquimixticola soesokkakensis CECT_8620	Loktanella atrilutea DSM_29326	92.4848	0.9035	63.97	81.1815	85.1268	52.124
Aquimixticola soesokkakensis CECT_8620	Loktanella fryxellensis DSM_16213	92.0216	0.9129	63.64	80.9795	84.7932	52.7181
Aquimixticola soesokkakensis CECT_8620	Loktanella salsilacus DSM_16199	92.2973	0.9015	64	81.1456	85.6165	51.2106
Aquimixticola soesokkakensis CECT_8620	Marinibacterium profundimaris 22II1-22F33	91.9946	0.851	63.7	81.7643	85.7183	54.2636
Aquimixticola soesokkakensis CECT_8620	Monaibacterium marinum C7	93.3649	1.0959	60.49	78.0288	83.0873	48.1039
Aquimixticola soesokkakensis CECT_8620	Neptunicoccus sediminis CY02	92.7946	0.9824	61.87	79.4958	84.4066	48.6338
Aquimixticola soesokkakensis CECT_8620	Nioella nitratireducens SSW136	93.5593	0.8305	64.35	81.9075	86.105	53.2189
Aquimixticola soesokkakensis CECT_8620	Nioella sediminis JS7-11	92.8281	0.8036	64.14	81.3819	85.2966	52.5072
Aquimixticola soesokkakensis CECT_8620	Oceanicella actignis CGMCC_1.10808	89.9721	1.2192	60.03	76.6052	80.7785	52.1776
Aquimixticola soesokkakensis CECT_8620	Oceaniglobus indicus 1-19b	92.9966	0.9003	64.84	81.4543	85.6225	52.6957
Aquimixticola soesokkakensis CECT_8620	Oceaniovalibus guishaninsula JLT2003	92.6401	0.9824	64.68	78.7883	82.8308	51.4105
Aquimixticola soesokkakensis CECT_8620	Octadecabacter antarcticus 307	92.9006	0.9004	63.57	79.4707	84.8293	46.8477
Aquimixticola soesokkakensis CECT_8620	Octadecabacter arcticus 238	93.1174	0.897	64.1	79.5026	84.8341	47.544
Aquimixticola soesokkakensis CECT_8620	Octadecabacter ascidiaceicola CECT_8868	92.6302	0.8581	64.28	80.2809	85.3851	46.5859
Aquimixticola soesokkakensis CECT_8620	Octadecabacter temperatus SB1	92.6978	0.8537	64.41	80.2453	85.3486	46.0647
Aquimixticola soesokkakensis CECT_8620	Pacificibacter marinus DSM_25228	95.7346	0.4881	68.08	83.5624	89.4504	47.7697
Aquimixticola soesokkakensis CECT_8620	Pacificibacter maritimus DSM_104731	95.87	0.4899	68.18	83.2562	89.3225	47.1913
Aquimixticola soesokkakensis CECT_8620	Paenirhodobacter enshiensis DW2-9	92.1309	1.1191	63.32	80.2903	84.5488	53.366
Aquimixticola soesokkakensis CECT_8620	Palleronia abyssalis CECT_8504	91.9377	1.0218	63.38	80.1145	84.4421	50.1861
Aquimixticola soesokkakensis CECT_8620	Palleronia marisminoris CECT_7066	91.1367	1.0192	63.35	80.6002	84.6866	51.7865
Aquimixticola soesokkakensis CECT_8620	Pararhodobacter aggregans D1-19	91.8919	0.9811	62.42	80.1478	84.2947	53.3797
Aquimixticola soesokkakensis CECT_8620	Pararhodobacter marinus CIC4N-9	93.0988	0.9662	62.79	80.103	84.2504	53.4103
Aquimixticola soesokkakensis CECT_8620	Phaeobacter gallaeciensis DSM_26640	94.7154	0.9376	64.98	82.0949	86.3917	51.1522
Aquimixticola soesokkakensis CECT_8620	Phaeobacter inhibens DSM_16374	94.4444	0.9294	64.69	82.105	86.4152	51.1112
Aquimixticola soesokkakensis CECT_8620	Phaeobacter italicus CECT_7645	93.555	0.9189	64.81	82.3822	86.5737	51.6841
Aquimixticola soesokkakensis CECT_8620	Phaeobacter porticola strain_P97	93.9271	0.9468	64.69	81.7358	86.2483	50.1028
Aquimixticola soesokkakensis CECT_8620	Pontivivens insulae CeCT_8812	91.6216	1.0616	60.59	78.6306	83.3547	47.5234
Aquimixticola soesokkakensis CECT_8620	Pseudodonghicola xiamenensis DSM_18339	93.5056	0.8169	64.7	82.4915	86.7334	53.4149
Aquimixticola soesokkakensis CECT_8620	Pseudooctadecabacter jejudonensis CECT_8397	93.4415	0.8009	64.25	80.613	85.5236	49.9405
Aquimixticola soesokkakensis CECT_8620	Pseudophaeobacter arcticus DSM_23566	93.1572	0.9493	64.23	81.6385	85.9495	51.3846
Aquimixticola soesokkakensis CECT_8620	Pseudophaeobacter leonis 306	92.2402	0.9819	63.86	72.8395	76.5688	45.2118
Aquimixticola soesokkakensis CECT_8620	Pseudoroseicyclus aestuarii CECT_9025	92.3442	0.9859	63.2	79.6978	83.6031	52.8444
Aquimixticola soesokkakensis CECT_8620	Rhodobaca barguzinensis alga05	92.1622	0.9725	62.52	80.1514	85.0052	48.1363
Aquimixticola soesokkakensis CECT_8620	Rhodovulum imhoffii DSM_18064	91.954	0.8438	65.34	81.0809	85.3951	49.9038
Aquimixticola soesokkakensis CECT_8620	Rhodovulum kholense DSM_19783	93.2881	0.8374	64.82	81.9202	85.6678	54.09
Aquimixticola soesokkakensis CECT_8620	Rhodovulum robiginosum DSM_12329	92.4949	0.8138	65.95	81.6297	85.4533	53.8297
Aquimixticola soesokkakensis CECT_8620	Rhodovulum sulfidophilum DSM_1374	93.0847	0.862	64.57	82.0265	85.795	54.1285
Aquimixticola soesokkakensis CECT_8620	Rhodovulum viride JA756	93.0894	0.8388	64.87	81.9362	85.6721	54.1005
Aquimixticola soesokkakensis CECT_8620	Roseibaca calidilacus HL-91	91.7623	0.9906	63.33	79.4747	84.3993	50.6779
Aquimixticola soesokkakensis CECT_8620	Roseibaca ekhonensis CECT_7235	91.2897	1.0025	63.08	79.5573	84.2699	50.4225
Aquimixticola soesokkakensis CECT_8620	Roseibacterium elongatum DSM_19469	93.4459	0.8534	63.8	78.0682	82.0893	51.3439
Aquimixticola soesokkakensis CECT_8620	Roseicitreum antarcticum CGMCC_1.8894	93.2478	0.9419	63.82	79.9116	84.6011	51.7141
Aquimixticola soesokkakensis CECT_8620	Roseicyclus mahoneyensis DSM_16097	92.1622	0.8703	63.14	81.1337	85.2249	53.1145
Aquimixticola soesokkakensis CECT_8620	Roseinatronobacter thiooxidans ALG1	92.3025	0.9734	63.24	80.0952	84.9333	50.1269
Aquimixticola soesokkakensis CECT_8620	Roseisalinus antarcticus CECT_7023	92.4797	0.8783	64.18	81.2075	85.0552	52.7432
Aquimixticola soesokkakensis CECT_8620	Roseobacter denitrificans OCh_114_DSM_7001	93.3108	0.8468	64.3	80.8629	85.481	50.0036
Aquimixticola soesokkakensis CECT_8620	Roseobacter litoralis Och_149	93.5135	0.8364	64.19	81.0874	85.9605	48.4963
Aquimixticola soesokkakensis CECT_8620	Rubrimonas cliftonensis DSM_15345	88.4225	1.3572	57.54	75.1303	79.4828	49.4657
Aquimixticola soesokkakensis CECT_8620	Sedimentitalea nanhaiensis DSM_24252	93.7754	0.7868	64.77	81.3957	85.8867	52.0793
Aquimixticola soesokkakensis CECT_8620	Shimia abyssi DSM_100673	92.8184	0.8169	64.45	81.4866	86.3126	48.3029
Aquimixticola soesokkakensis CECT_8620	Shimia aestuarii DSM_15283	92.7507	0.7762	65.36	82.4854	86.636	52.5866
Aquimixticola soesokkakensis CECT_8620	Shimia haliotis DSM_28453	93.7669	0.8246	64.48	81.8635	86.4172	51.0169
Aquimixticola soesokkakensis CECT_8620	Shimia isoporae SW6_1	93.2341	0.8269	64.57	81.5546	86.4268	47.531
Aquimixticola soesokkakensis CECT_8620	Shimia marina CECT_7688	92.7556	0.8418	64.48	81.7195	86.0355	49.7084
Aquimixticola soesokkakensis CECT_8620	Shimia sagamensis JAMH011_1	92.5625	0.8385	63.97	81.6598	86.4188	48.2737
Aquimixticola soesokkakensis CECT_8620	Silicimonas algicola DSM_103371	93.1081	0.9006	63.83	80.8932	85.0837	50.5382
Aquimixticola soesokkakensis CECT_8620	Tabrizicola aquatica RCRI19	91.1486	1.0453	63.62	79.9684	84.2804	51.9063
Aquimixticola soesokkakensis CECT_8620	Thalassobacter stenotrophicus CECT_5294	92.5926	0.8738	64.27	80.8164	85.7293	48.3478
Aquimixticola soesokkakensis CECT_8620	Thioclava arenosa CAU_1312	92.1356	1.0082	65.4	81.7118	85.7442	54.632
Aquimixticola soesokkakensis CECT_8620	Thioclava atlantica 13D2W-2	93.8389	1.0773	64.37	81.8621	85.9265	53.8627
Aquimixticola soesokkakensis CECT_8620	Thioclava dalianensis strain_DLFJ1-1	94.3166	1.1263	64.22	81.1944	85.5345	53.0848
Aquimixticola soesokkakensis CECT_8620	Thioclava electrotropha Elox9	93.6401	1.1029	64.18	81.6002	85.7835	54.0564
Aquimixticola soesokkakensis CECT_8620	Thioclava indica strain_DT23-4	93.1174	1.0957	63.94	81.1774	85.8244	53.5315
Aquimixticola soesokkakensis CECT_8620	Thioclava marina 11-10-0-13	93.843	1.0828	64.34	81.7786	85.8819	53.9015
Aquimixticola soesokkakensis CECT_8620	Thioclava nitratireducens 25B10_4	93.7162	1.0966	64.2	81.6343	85.7805	53.8026
Aquimixticola soesokkakensis CECT_8620	Thioclava pacifica DSM_10166	93.7838	1.0759	64.78	82.033	86.244	53.9329
Aquimixticola soesokkakensis CECT_8620	Thioclava sediminum TAW-CT134	93.5811	1.0987	64.3	81.2556	85.4434	53.8885
Aquimixticola soesokkakensis CECT_8620	Tranquillimonas alkanivorans DSM_19547	90.8759	0.8329	65.9	82.2676	86.0985	52.6852
Aquimixticola soesokkakensis CECT_8620	Wenxinia marina DSM_24838	91.9649	0.911	64.07	80.6509	84.2877	51.5087
Aquimixticola soesokkakensis CECT_8620	Wenxinia saemankumensis DSM_100565	91.8298	0.9343	63.43	80.7031	84.3194	52.2098
Aquimixticola soesokkakensis CECT_8620	Yoonia litorea DSM_29433	93.1711	0.9267	64.58	80.8952	85.5789	47.6501
Aquimixticola soesokkakensis CECT_8620	Yoonia maricola DSM_29128	93.6314	0.893	64.3	80.7121	85.741	47.3769
Aquimixticola soesokkakensis CECT_8620	Yoonia maritima DSM_101533	93.4959	0.855	65.06	81.2491	86.3988	45.1497
Aquimixticola soesokkakensis CECT_8620	Yoonia rosea DSM_29591	93.6314	0.881	64.5	81.4591	85.9942	49.6565
Aquimixticola soesokkakensis CECT_8620	Yoonia sediminilitoris DSM_29955	93.7585	0.8608	64.22	81.1636	85.9965	48.6693
Aquimixticola soesokkakensis CECT_8620	Yoonia tamlensis DSM_26879	93.2478	0.8729	64.95	81.5572	86.2489	50.2414
Aquimixticola soesokkakensis CECT_8620	Yoonia vestfoldensis DSM_16212	91.9703	0.9189	64.74	81.4168	85.6912	53.0178
Ascidiaceihabitans donghaensis CECT_8599	Acuticoccus yangtzensis JL1095	87.6268	2.1936	52.09	66.5363	73.4718	38.9392
Ascidiaceihabitans donghaensis CECT_8599	Ahrensia kielensis DSM_5890	87.2921	2.1864	53.43	66.4695	74.2042	35.8462
Ascidiaceihabitans donghaensis CECT_8599	Ahrensia marina LZD062	86.6267	2.1793	53.93	66.3969	74.0237	36.8625
Ascidiaceihabitans donghaensis CECT_8599	Albimonas donghaensis DSM_17890	89.3387	1.28	58.67	74.1841	80.2553	42.8371
Ascidiaceihabitans donghaensis CECT_8599	Albimonas pacifica CGMCC_1.11030	90.2505	1.276	58.33	73.8968	79.9853	42.3723
Ascidiaceihabitans donghaensis CECT_8599	Aliiroseovarius crassostreae CV919-312	94.0621	0.7862	65.62	81.0233	86.6457	47.4532
Ascidiaceihabitans donghaensis CECT_8599	Aliiroseovarius halocynthiae MA1_10_1	95.0542	0.7964	66	81.5172	87.0948	47.2049
Ascidiaceihabitans donghaensis CECT_8599	Aliiroseovarius pelagivivens CECT_8811	94.929	0.7992	66.05	81.256	86.9145	47.4085
Ascidiaceihabitans donghaensis CECT_8599	Aliiroseovarius sediminilitoris DSM_29439	94.0621	0.825	66.25	81.0155	86.7144	47.2334
Ascidiaceihabitans donghaensis CECT_8599	Amylibacter kogurei strain_4G11	92.4375	1.1036	61.93	76.7734	83.6731	43.4406
Ascidiaceihabitans donghaensis CECT_8599	Boseongicola aestuarii CECT_8489	93.8514	0.8771	65.92	81.0999	86.7578	45.4646
Ascidiaceihabitans donghaensis CECT_8599	Brevirhabdus pacifica 22DY15	93.6444	0.8669	65.82	79.1307	84.482	45.5867
Ascidiaceihabitans donghaensis CECT_8599	Cereibacter changlensis DSM_18774	90.7557	0.9313	63.82	79.8153	85.3396	45.2461
Ascidiaceihabitans donghaensis CECT_8599	Cognatiyoonia koreensis DSM_17925	93.843	0.8274	66.73	81.4852	87.1526	46.0287
Ascidiaceihabitans donghaensis CECT_8599	Cognatiyoonia sediminum DSM_28715	94.6477	0.8781	66.77	81.3016	87.1118	44.9501
Ascidiaceihabitans donghaensis CECT_8599	Cribrihabitans marinus DSM_29340	92.6928	0.6068	68.74	82.8956	88.0506	47.4751
Ascidiaceihabitans donghaensis CECT_8599	Dinoroseobacter shibae DFL_12	93.2203	0.8401	65.83	80.9366	86.4527	45.6115
Ascidiaceihabitans donghaensis CECT_8599	Haematobacter massiliensis CCUG_47968	90.3503	0.9553	62.66	78.7669	84.4819	42.9454
Ascidiaceihabitans donghaensis CECT_8599	Haematobacter missouriensis H1892	90.8968	0.9543	62.34	78.5358	84.4384	42.8059
Ascidiaceihabitans donghaensis CECT_8599	Hasllibacter halocynthiae DSM_29318	92.9006	1.1402	61.98	76.2931	81.6348	41.2445
Ascidiaceihabitans donghaensis CECT_8599	Hwanghaeicola aestuarii DSM_22009	89.956	0.9575	63.46	78.9529	84.5147	41.4843
Ascidiaceihabitans donghaensis CECT_8599	Jannaschia aquimarina GSW-M26	91.2838	0.9908	62.84	78.4682	84.1356	43.1419
Ascidiaceihabitans donghaensis CECT_8599	Jannaschia donghaensis CECT_7802	92.5826	1.0706	63.67	79.5992	85.2311	45.5373
Ascidiaceihabitans donghaensis CECT_8599	Jannaschia faecimaris DSM_100420	91.9083	1.0525	63.81	79.862	85.7519	44.7841
Ascidiaceihabitans donghaensis CECT_8599	Jannaschia helgolandensis DSM_14858	92.1622	1.0332	63.71	79.7278	85.4057	45.6199
Ascidiaceihabitans donghaensis CECT_8599	Jannaschia pohangensis DSM_19073	92.78	0.9868	63.72	80.1161	85.6736	45.6636
Ascidiaceihabitans donghaensis CECT_8599	Jannaschia rubra CECT_5088	91.7623	1.0524	63.08	79.4746	85.0293	44.2559
Ascidiaceihabitans donghaensis CECT_8599	Jannaschia seohaensis DSM_25227	92.5625	0.9686	63.57	79.5855	85.2988	44.3862
Ascidiaceihabitans donghaensis CECT_8599	Kandeliimicrobium roseum XY-R6	90.6185	0.885	65.41	80.4737	85.9559	45.1322
Ascidiaceihabitans donghaensis CECT_8599	Leisingera aquaemixtae CECT_8399	94.1774	0.7394	68.25	83.2394	88.4683	49.001
Ascidiaceihabitans donghaensis CECT_8599	Leisingera aquimarina DSM_24565	95.0609	0.734	68.25	83.0623	88.3775	48.9322
Ascidiaceihabitans donghaensis CECT_8599	Leisingera caerulea DSM_24564	94.046	0.7315	68.37	83.0501	88.3066	48.8383
Ascidiaceihabitans donghaensis CECT_8599	Leisingera daeponensis DSM_23529	93.5223	0.7385	68.34	83.3301	88.4667	49.2031
Ascidiaceihabitans donghaensis CECT_8599	Leisingera methylohalidivorans DSM_14336	94.3995	0.753	68.62	83.2757	88.5668	49.1526
Ascidiaceihabitans donghaensis CECT_8599	Limimaricola cinnabarinus LL-001	92.6202	0.9367	64.06	74.8884	80.0875	41.9452
Ascidiaceihabitans donghaensis CECT_8599	Limimaricola hongkongensis DSM_17492	92.6102	0.8871	64.68	80.1573	85.5577	45.5146
Ascidiaceihabitans donghaensis CECT_8599	Limimaricola pyoseonensis DSM_21424	91.4692	0.8656	64.08	80.0199	85.605	44.9654
Ascidiaceihabitans donghaensis CECT_8599	Limimaricola soesokkakensis CECT_8367	92.3494	0.9136	64.26	80.2505	85.7715	44.8616
Ascidiaceihabitans donghaensis CECT_8599	Litoreibacter albidus DSM_26922	93.4548	0.8541	65.98	81.5408	87.1391	47.9049
Ascidiaceihabitans donghaensis CECT_8599	Litoreibacter arenae DSM_19593	93.9946	0.7957	66.42	81.5255	87.0381	47.67
Ascidiaceihabitans donghaensis CECT_8599	Litoreibacter ascidiaceicola DSM_100566	93.1174	0.8353	66.26	81.3517	87.0078	47.4714
Ascidiaceihabitans donghaensis CECT_8599	Litoreibacter halocynthiae MA1-10_1	93.7162	0.8387	66.37	81.3395	87.0018	47.424
Ascidiaceihabitans donghaensis CECT_8599	Litoreibacter janthinus DSM_26921	93.6444	0.8159	66.21	81.2971	87.0204	46.7298
Ascidiaceihabitans donghaensis CECT_8599	Litoreibacter meonggei DSM_29466	94.1931	0.8346	66.12	81.258	86.8412	47.0273
Ascidiaceihabitans donghaensis CECT_8599	Loktanella atrilutea DSM_29326	92.2192	0.8719	64.89	80.7881	86.0897	46.3119
Ascidiaceihabitans donghaensis CECT_8599	Loktanella fryxellensis DSM_16213	91.9595	0.8813	64.69	80.377	85.6909	46.785
Ascidiaceihabitans donghaensis CECT_8599	Loktanella salsilacus DSM_16199	91.9028	0.8699	64.87	81.0662	86.6302	48.029
Ascidiaceihabitans donghaensis CECT_8599	Marinibacterium profundimaris 22II1-22F33	92.9444	0.6642	67.45	81.9498	87.4038	47.4276
Ascidiaceihabitans donghaensis CECT_8599	Monaibacterium marinum C7	92	1.1099	61.16	77.3341	83.4325	43.8785
Ascidiaceihabitans donghaensis CECT_8599	Neptunicoccus sediminis CY02	92.4059	0.9963	62.85	78.786	84.8542	46.0608
Ascidiaceihabitans donghaensis CECT_8599	Nioella nitratireducens SSW136	93.0358	0.8445	65.01	80.3996	86.1204	46.8518
Ascidiaceihabitans donghaensis CECT_8599	Nioella sediminis JS7-11	93.3873	0.8176	65.4	80.1676	85.6178	46.3719
Ascidiaceihabitans donghaensis CECT_8599	Oceanicella actignis CGMCC_1.10808	89.2907	1.2331	59.92	74.7482	80.6366	43.4825
Ascidiaceihabitans donghaensis CECT_8599	Oceaniglobus indicus 1-19b	91.9246	0.9143	65.01	80.5453	85.9146	47.0176
Ascidiaceihabitans donghaensis CECT_8599	Oceaniovalibus guishaninsula JLT2003	92.5676	0.9963	64.77	77.5928	82.9805	44.8339
Ascidiaceihabitans donghaensis CECT_8599	Octadecabacter antarcticus 307	93.2478	0.8688	66.5	80.8626	86.522	46.6239
Ascidiaceihabitans donghaensis CECT_8599	Octadecabacter arcticus 238	93.2569	0.8654	67.03	80.9372	86.645	47.2437
Ascidiaceihabitans donghaensis CECT_8599	Octadecabacter ascidiaceicola CECT_8868	93.1803	0.8265	67.22	81.8112	87.2965	46.8392
Ascidiaceihabitans donghaensis CECT_8599	Octadecabacter temperatus SB1	92.9777	0.8221	66.71	81.8775	87.2689	46.6308
Ascidiaceihabitans donghaensis CECT_8599	Pacificibacter marinus DSM_25228	95.1318	0.8636	64	80.0345	86.2872	46.1748
Ascidiaceihabitans donghaensis CECT_8599	Pacificibacter maritimus DSM_104731	94.9966	0.8655	63.93	80.3524	86.4596	45.8063
Ascidiaceihabitans donghaensis CECT_8599	Paenirhodobacter enshiensis DW2-9	90.1252	1.1331	61.39	77.8403	83.6773	44.481
Ascidiaceihabitans donghaensis CECT_8599	Palleronia abyssalis CECT_8504	91.9486	1.0358	63.44	78.6302	84.4621	44.2889
Ascidiaceihabitans donghaensis CECT_8599	Palleronia marisminoris CECT_7066	91.3572	1.0332	63.08	78.7496	84.5659	44.494
Ascidiaceihabitans donghaensis CECT_8599	Pararhodobacter aggregans D1-19	90.4184	0.9951	61.69	78.1708	83.8683	45.1619
Ascidiaceihabitans donghaensis CECT_8599	Pararhodobacter marinus CIC4N-9	91.1307	0.9802	61.91	78.1323	83.8207	45.217
Ascidiaceihabitans donghaensis CECT_8599	Phaeobacter gallaeciensis DSM_26640	94.5196	0.7508	68.92	83.2311	88.5529	48.1381
Ascidiaceihabitans donghaensis CECT_8599	Phaeobacter inhibens DSM_16374	94.5196	0.7426	68.63	83.0537	88.417	48.1358
Ascidiaceihabitans donghaensis CECT_8599	Phaeobacter italicus CECT_7645	94.0937	0.7321	68.63	83.2653	88.6144	48.7255
Ascidiaceihabitans donghaensis CECT_8599	Phaeobacter porticola strain_P97	94.5344	0.7599	68.89	83.0546	88.5561	47.9816
Ascidiaceihabitans donghaensis CECT_8599	Pontivivens insulae CeCT_8812	91.3514	1.0756	61.14	77.6337	83.6393	43.0942
Ascidiaceihabitans donghaensis CECT_8599	Pseudodonghicola xiamenensis DSM_18339	93.3054	0.6301	67.93	82.623	88.0577	47.4377
Ascidiaceihabitans donghaensis CECT_8599	Pseudophaeobacter arcticus DSM_23566	94.2451	0.7625	67.58	82.7235	88.2627	48.9842
Ascidiaceihabitans donghaensis CECT_8599	Pseudophaeobacter leonis 306	92.7126	0.795	68.04	73.7928	78.5112	43.2641
Ascidiaceihabitans donghaensis CECT_8599	Pseudoroseicyclus aestuarii CECT_9025	91.4015	0.9543	63.2	78.2983	83.5788	44.2187
Ascidiaceihabitans donghaensis CECT_8599	Rhodobaca barguzinensis alga05	90.4858	0.9865	62.76	78.7899	84.7338	44.4715
Ascidiaceihabitans donghaensis CECT_8599	Rhodovulum imhoffii DSM_18064	90.4665	0.8578	65.55	79.8615	85.3856	44.3304
Ascidiaceihabitans donghaensis CECT_8599	Rhodovulum kholense DSM_19783	89.9932	0.8513	64.49	80.1841	85.5856	45.6885
Ascidiaceihabitans donghaensis CECT_8599	Rhodovulum robiginosum DSM_12329	90.1551	0.8278	65.6	80.1326	85.6188	45.9107
Ascidiaceihabitans donghaensis CECT_8599	Rhodovulum sulfidophilum DSM_1374	90.2637	0.876	64.69	80.1929	85.6627	45.3312
Ascidiaceihabitans donghaensis CECT_8599	Rhodovulum viride JA756	89.9865	0.8528	64.5	80.2502	85.6313	45.745
Ascidiaceihabitans donghaensis CECT_8599	Roseibaca calidilacus HL-91	90.6883	1.0046	63.25	78.459	84.3519	46.3864
Ascidiaceihabitans donghaensis CECT_8599	Roseibaca ekhonensis CECT_7235	90.8232	1.0165	62.8	78.299	84.4906	45.5999
Ascidiaceihabitans donghaensis CECT_8599	Roseibacterium elongatum DSM_19469	93.0988	0.8674	64.78	76.6489	82.0288	44.5367
Ascidiaceihabitans donghaensis CECT_8599	Roseicitreum antarcticum CGMCC_1.8894	91.2955	0.9559	63.55	79.0463	84.8243	46.2512
Ascidiaceihabitans donghaensis CECT_8599	Roseicyclus mahoneyensis DSM_16097	91.9083	0.8843	64.08	79.9797	85.3713	46.2158
Ascidiaceihabitans donghaensis CECT_8599	Roseinatronobacter thiooxidans ALG1	90.5533	0.9874	63.4	78.8808	84.8254	46.1019
Ascidiaceihabitans donghaensis CECT_8599	Roseisalinus antarcticus CECT_7023	91.8133	0.8467	65.09	80.2242	85.8142	45.4067
Ascidiaceihabitans donghaensis CECT_8599	Roseobacter denitrificans OCh_114_DSM_7001	94.6694	0.4467	71.59	84.5961	89.7075	48.1919
Ascidiaceihabitans donghaensis CECT_8599	Roseobacter litoralis Och_149	94.7368	0.4363	71.44	84.9564	90.1636	48.07
Ascidiaceihabitans donghaensis CECT_8599	Rubrimonas cliftonensis DSM_15345	87.4746	1.3712	57.44	73.5121	79.3327	41.6175
Ascidiaceihabitans donghaensis CECT_8599	Sedimentitalea nanhaiensis DSM_24252	95.1253	0.6	69.4	83.6738	88.9935	49.0302
Ascidiaceihabitans donghaensis CECT_8599	Shimia abyssi DSM_100673	93.6401	0.6746	68.07	82.5325	87.8852	46.9463
Ascidiaceihabitans donghaensis CECT_8599	Shimia aestuarii DSM_15283	94.046	0.6339	68.58	82.9979	88.0496	47.9925
Ascidiaceihabitans donghaensis CECT_8599	Shimia haliotis DSM_28453	94.6549	0.6823	67.58	82.6568	88.0609	48.3217
Ascidiaceihabitans donghaensis CECT_8599	Shimia isoporae SW6_1	94.2412	0.6845	67.43	82.4709	88.048	45.9561
Ascidiaceihabitans donghaensis CECT_8599	Shimia marina CECT_7688	94.5726	0.6995	67.68	82.1211	87.36	47.8145
Ascidiaceihabitans donghaensis CECT_8599	Shimia sagamensis JAMH011_1	93.712	0.6962	67.28	82.7779	88.0962	47.9736
Ascidiaceihabitans donghaensis CECT_8599	Silicimonas algicola DSM_103371	91.8354	0.9146	63.87	79.4136	85.2527	43.2686
Ascidiaceihabitans donghaensis CECT_8599	Tabrizicola aquatica RCRI19	90.817	1.0593	62.91	78.5029	84.4272	45.3084
Ascidiaceihabitans donghaensis CECT_8599	Thalassobacter stenotrophicus CECT_5294	93.9353	0.8878	66.07	80.978	86.7488	45.9166
Ascidiaceihabitans donghaensis CECT_8599	Thioclava arenosa CAU_1312	90.7921	1.0222	64.14	79.481	84.926	45.947
Ascidiaceihabitans donghaensis CECT_8599	Thioclava atlantica 13D2W-2	91.8864	1.0913	62.96	79.5697	85.1471	44.4377
Ascidiaceihabitans donghaensis CECT_8599	Thioclava dalianensis strain_DLFJ1-1	92.2973	1.1403	62.47	79.1448	84.823	45.0682
Ascidiaceihabitans donghaensis CECT_8599	Thioclava electrotropha Elox9	91.6103	1.1169	62.67	79.2999	84.9365	45.2457
Ascidiaceihabitans donghaensis CECT_8599	Thioclava indica strain_DT23-4	92.2402	1.1096	62.76	79.4298	85.1407	46.3749
Ascidiaceihabitans donghaensis CECT_8599	Thioclava marina 11-10-0-13	91.272	1.0967	62.99	79.6127	85.057	44.9446
Ascidiaceihabitans donghaensis CECT_8599	Thioclava nitratireducens 25B10_4	91.2955	1.1106	62.99	79.4615	85.0028	45.0305
Ascidiaceihabitans donghaensis CECT_8599	Thioclava pacifica DSM_10166	90.9582	1.0899	63.05	79.7268	85.2963	44.9419
Ascidiaceihabitans donghaensis CECT_8599	Thioclava sediminum TAW-CT134	91.2955	1.1127	62.67	79.0913	84.7324	45.2389
Ascidiaceihabitans donghaensis CECT_8599	Tranquillimonas alkanivorans DSM_19547	90.0947	0.8468	65.23	80.5255	86.1845	45.0263
Ascidiaceihabitans donghaensis CECT_8599	Wenxinia marina DSM_24838	91.6273	0.8794	64.2	79.2785	84.7131	43.7127
Ascidiaceihabitans donghaensis CECT_8599	Wenxinia saemankumensis DSM_100565	92.1675	0.9028	63.96	79.5054	84.6308	43.537
Ascidiaceihabitans donghaensis CECT_8599	Yoonia litorea DSM_29433	93.5637	0.8951	66.81	81.3138	86.901	45.4242
Ascidiaceihabitans donghaensis CECT_8599	Yoonia maricola DSM_29128	93.5047	0.8614	66.47	81.7757	87.1645	46.7466
Ascidiaceihabitans donghaensis CECT_8599	Yoonia maritima DSM_101533	93.2295	0.8235	66.17	82.2044	87.8316	45.9885
Ascidiaceihabitans donghaensis CECT_8599	Yoonia rosea DSM_29591	93.568	0.8494	67.09	82.0881	87.3745	47.5236
Ascidiaceihabitans donghaensis CECT_8599	Yoonia sediminilitoris DSM_29955	93.4915	0.8292	66.9	81.8506	87.4714	47.1637
Ascidiaceihabitans donghaensis CECT_8599	Yoonia tamlensis DSM_26879	92.8523	0.8413	66.63	82.2237	87.6248	48.5582
Ascidiaceihabitans donghaensis CECT_8599	Yoonia vestfoldensis DSM_16212	92.655	0.8873	66.2	81.319	86.9365	48.0646
Boseongicola aestuarii CECT_8489	Acuticoccus yangtzensis JL1095	87.3989	2.1239	52.9	67.9828	73.7246	43.084
Boseongicola aestuarii CECT_8489	Ahrensia kielensis DSM_5890	88.541	2.1168	53.98	66.9941	74.2394	34.5236
Boseongicola aestuarii CECT_8489	Ahrensia marina LZD062	88.4077	2.1096	54.73	67.0459	74.0929	36.1211
Boseongicola aestuarii CECT_8489	Albimonas donghaensis DSM_17890	88.9038	1.2104	59.21	76.1759	80.7059	47.1558
Boseongicola aestuarii CECT_8489	Albimonas pacifica CGMCC_1.11030	89.912	1.2063	58.8	76.0132	80.5106	47.4836
Boseongicola aestuarii CECT_8489	Amylibacter kogurei strain_4G11	93.7035	1.0339	61.89	75.9837	83.1955	40.1341
Boseongicola aestuarii CECT_8489	Cereibacter changlensis DSM_18774	91.4478	0.8616	64.38	81.4008	85.6973	50.5555
Boseongicola aestuarii CECT_8489	Cognatiyoonia koreensis DSM_17925	92.4426	0.9194	65.73	81.4712	86.2115	46.0987
Boseongicola aestuarii CECT_8489	Cognatiyoonia sediminum DSM_28715	92.891	0.9702	65.57	80.5023	85.9801	44.0005
Boseongicola aestuarii CECT_8489	Haematobacter massiliensis CCUG_47968	92.0114	0.8856	63.23	80.869	85.1554	47.3454
Boseongicola aestuarii CECT_8489	Haematobacter missouriensis H1892	92.3284	0.8846	63.35	80.6218	85.0002	46.7739
Boseongicola aestuarii CECT_8489	Hasllibacter halocynthiae DSM_29318	94.249	0.9643	63.4	78.2016	82.3281	47.0462
Boseongicola aestuarii CECT_8489	Hwanghaeicola aestuarii DSM_22009	91.5267	0.7241	64.48	81.6503	85.4971	47.3785
Boseongicola aestuarii CECT_8489	Jannaschia aquimarina GSW-M26	93.2341	0.9211	63.57	79.8942	84.1242	47.2919
Boseongicola aestuarii CECT_8489	Jannaschia donghaensis CECT_7802	93.5767	1.0009	63.97	80.2206	84.8298	48.5444
Boseongicola aestuarii CECT_8489	Jannaschia faecimaris DSM_100420	93.5767	0.9828	64.31	80.6379	85.248	47.6426
Boseongicola aestuarii CECT_8489	Jannaschia helgolandensis DSM_14858	93.7669	0.9635	63.8	80.5823	85.2008	48.4324
Boseongicola aestuarii CECT_8489	Jannaschia pohangensis DSM_19073	93.5724	0.9171	64.07	81.1441	85.4627	49.2456
Boseongicola aestuarii CECT_8489	Jannaschia rubra CECT_5088	93.1664	0.9827	64	80.4923	84.8226	48.3486
Boseongicola aestuarii CECT_8489	Jannaschia seohaensis DSM_25227	93.0941	0.8989	64.03	80.9701	85.2085	49.0265
Boseongicola aestuarii CECT_8489	Kandeliimicrobium roseum XY-R6	92.7928	0.6517	66.57	82.7636	86.5852	50.9563
Boseongicola aestuarii CECT_8489	Leisingera aquaemixtae CECT_8399	92.6401	0.9868	65.03	82.1102	86.2441	50.3435
Boseongicola aestuarii CECT_8489	Leisingera aquimarina DSM_24565	92.8427	0.9813	65.16	81.6499	86.1272	49.228
Boseongicola aestuarii CECT_8489	Leisingera caerulea DSM_24564	92.3025	0.9788	64.96	81.9073	86.1303	49.9769
Boseongicola aestuarii CECT_8489	Leisingera daeponensis DSM_23529	92.2297	0.9858	65.04	82.2789	86.3963	50.429
Boseongicola aestuarii CECT_8489	Leisingera methylohalidivorans DSM_14336	92.5776	1.0004	65.19	81.8706	86.3246	49.6139
Boseongicola aestuarii CECT_8489	Limimaricola cinnabarinus LL-001	91.4922	1.0288	64.96	76.1885	80.1328	46.5432
Boseongicola aestuarii CECT_8489	Limimaricola hongkongensis DSM_17492	91.7623	0.9792	65.18	81.5339	85.484	50.3607
Boseongicola aestuarii CECT_8489	Limimaricola pyoseonensis DSM_21424	90.7495	0.9577	64.75	81.7839	85.6904	50.5125
Boseongicola aestuarii CECT_8489	Limimaricola soesokkakensis CECT_8367	91.4922	1.0057	64.88	81.7374	85.9237	49.809
Boseongicola aestuarii CECT_8489	Litoreibacter albidus DSM_26922	92.9919	0.9462	65.3	81.2361	86.4773	47.4159
Boseongicola aestuarii CECT_8489	Litoreibacter ascidiaceicola DSM_100566	93.1174	0.9274	65.67	81.3367	86.4622	47.7091
Boseongicola aestuarii CECT_8489	Litoreibacter halocynthiae MA1-10_1	93.5223	0.9308	65.65	81.29	86.4765	47.6084
Boseongicola aestuarii CECT_8489	Litoreibacter meonggei DSM_29466	94.9864	0.9267	65.75	81.279	86.4242	47.0546
Boseongicola aestuarii CECT_8489	Loktanella atrilutea DSM_29326	90.7495	0.964	64.46	81.275	85.5276	49.8103
Boseongicola aestuarii CECT_8489	Loktanella salsilacus DSM_16199	91.1486	0.962	64.29	81.2871	85.8817	48.5841
Boseongicola aestuarii CECT_8489	Monaibacterium marinum C7	91.954	1.0402	61.35	78.3314	83.5332	45.1221
Boseongicola aestuarii CECT_8489	Neptunicoccus sediminis CY02	92.9966	0.9266	62.27	79.3852	84.495	45.3295
Boseongicola aestuarii CECT_8489	Nioella nitratireducens SSW136	94.1216	0.7748	64.93	81.847	86.3754	49.7134
Boseongicola aestuarii CECT_8489	Nioella sediminis JS7-11	93.9783	0.7479	65.54	81.6729	85.7786	49.4412
Boseongicola aestuarii CECT_8489	Oceanicella actignis CGMCC_1.10808	90.0976	1.1635	60.21	76.5979	81.0513	48.1228
Boseongicola aestuarii CECT_8489	Oceaniglobus indicus 1-19b	92.1886	0.6809	66.09	82.4598	86.5282	50.1261
Boseongicola aestuarii CECT_8489	Oceaniovalibus guishaninsula JLT2003	93.7077	0.763	65.97	79.9467	83.9305	48.7168
Boseongicola aestuarii CECT_8489	Paenirhodobacter enshiensis DW2-9	91.6031	1.0634	62.48	79.4101	83.8962	49.6549
Boseongicola aestuarii CECT_8489	Palleronia abyssalis CECT_8504	92.9102	0.8024	64.49	80.9251	85.3767	48.3429
Boseongicola aestuarii CECT_8489	Palleronia marisminoris CECT_7066	92.6252	0.7998	64.03	81.3566	85.6414	49.816
Boseongicola aestuarii CECT_8489	Pararhodobacter aggregans D1-19	92.0539	0.9254	62.34	79.676	84.0549	49.4005
Boseongicola aestuarii CECT_8489	Pararhodobacter marinus CIC4N-9	92.4899	0.9105	62.64	79.7017	84.1179	49.6813
Boseongicola aestuarii CECT_8489	Phaeobacter gallaeciensis DSM_26640	91.9028	0.9981	65.86	81.7784	86.2641	47.6533
Boseongicola aestuarii CECT_8489	Phaeobacter inhibens DSM_16374	91.9028	0.9899	65.7	81.7099	86.1778	47.4735
Boseongicola aestuarii CECT_8489	Phaeobacter italicus CECT_7645	92.37	0.9794	65.68	81.9674	86.361	48.5139
Boseongicola aestuarii CECT_8489	Phaeobacter porticola strain_P97	92.2973	1.0072	65.84	81.4488	86.1327	46.933
Boseongicola aestuarii CECT_8489	Pontivivens insulae CeCT_8812	91.6948	1.0059	61.68	78.8599	83.6191	45.5082
Boseongicola aestuarii CECT_8489	Pseudophaeobacter arcticus DSM_23566	91.2221	1.0098	64.75	81.2466	85.9007	47.0177
Boseongicola aestuarii CECT_8489	Pseudophaeobacter leonis 306	90.8108	1.0424	64.43	72.5183	76.5561	42.3176
Boseongicola aestuarii CECT_8489	Rhodobaca barguzinensis alga05	91.7172	0.9168	63.27	80.1561	85.1433	45.2492
Boseongicola aestuarii CECT_8489	Rhodovulum kholense DSM_19783	92.027	0.7361	65.38	82.1196	86.0968	50.4018
Boseongicola aestuarii CECT_8489	Rhodovulum robiginosum DSM_12329	92.7654	0.7125	66.12	82.1382	86.1508	50.1655
Boseongicola aestuarii CECT_8489	Rhodovulum sulfidophilum DSM_1374	92.4324	0.7608	65.57	82.2033	86.1593	50.319
Boseongicola aestuarii CECT_8489	Rhodovulum viride JA756	91.8298	0.7375	65.49	82.0023	85.9688	50.3698
Boseongicola aestuarii CECT_8489	Roseibaca calidilacus HL-91	91.5209	0.9349	63.62	79.7866	84.5945	46.98
Boseongicola aestuarii CECT_8489	Roseibaca ekhonensis CECT_7235	91.6555	0.9468	63.6	79.8188	84.6442	46.7567
Boseongicola aestuarii CECT_8489	Roseibacterium elongatum DSM_19469	93.7332	0.7977	65.08	78.854	83.0615	48.2423
Boseongicola aestuarii CECT_8489	Roseicitreum antarcticum CGMCC_1.8894	92.6599	0.8862	63.78	80.3255	84.9969	47.6572
Boseongicola aestuarii CECT_8489	Roseicyclus mahoneyensis DSM_16097	93.0593	0.8146	64.82	82.011	86.3528	49.7158
Boseongicola aestuarii CECT_8489	Roseinatronobacter thiooxidans ALG1	91.7172	0.9177	63.53	80.0867	84.994	46.0575
Boseongicola aestuarii CECT_8489	Rubrimonas cliftonensis DSM_15345	88.0486	1.3015	58.12	75.4991	79.9336	46.6521
Boseongicola aestuarii CECT_8489	Silicimonas algicola DSM_103371	95.7375	0.4527	68.9	84.8593	88.7437	50.3374
Boseongicola aestuarii CECT_8489	Tabrizicola aquatica RCRI19	90.9091	0.9896	63.7	79.8919	84.4333	49.1299
Boseongicola aestuarii CECT_8489	Thalassobacter stenotrophicus CECT_5294	93.5897	0.8181	65.21	81.0771	86.1352	45.6295
Boseongicola aestuarii CECT_8489	Thioclava arenosa CAU_1312	92.5625	0.9525	64.05	80.7737	84.9818	50.3815
Boseongicola aestuarii CECT_8489	Thioclava atlantica 13D2W-2	94.1892	1.0216	63.03	80.8694	85.3677	49.3993
Boseongicola aestuarii CECT_8489	Thioclava dalianensis strain_DLFJ1-1	94.1892	1.0706	62.81	80.1767	84.7476	47.9883
Boseongicola aestuarii CECT_8489	Thioclava electrotropha Elox9	93.7205	1.0472	62.6	80.5845	85.0116	49.9441
Boseongicola aestuarii CECT_8489	Thioclava indica strain_DT23-4	94.0701	1.0399	63.07	80.3469	85.1421	47.7249
Boseongicola aestuarii CECT_8489	Thioclava marina 11-10-0-13	93.2478	1.027	63.18	80.8796	85.2384	49.664
Boseongicola aestuarii CECT_8489	Thioclava nitratireducens 25B10_4	94.1813	1.0409	62.94	80.7763	85.1953	49.74
Boseongicola aestuarii CECT_8489	Thioclava pacifica DSM_10166	93.7754	1.0202	63.39	81.1337	85.4838	49.7717
Boseongicola aestuarii CECT_8489	Thioclava sediminum TAW-CT134	94.046	1.043	62.71	80.4765	84.88	50.0388
Boseongicola aestuarii CECT_8489	Tranquillimonas alkanivorans DSM_19547	92.8	0.6135	66.77	83.2391	87.3444	50.9143
Boseongicola aestuarii CECT_8489	Yoonia litorea DSM_29433	92.5051	0.9872	66.07	81.2979	85.9645	45.8625
Boseongicola aestuarii CECT_8489	Yoonia maricola DSM_29128	92.1727	0.9535	65.76	81.1336	86.0497	45.5862
Boseongicola aestuarii CECT_8489	Yoonia maritima DSM_101533	91.9649	0.9155	65.36	81.3345	86.463	43.4828
Boseongicola aestuarii CECT_8489	Yoonia rosea DSM_29591	92.0324	0.9415	66.57	81.8164	86.2453	47.2382
Boseongicola aestuarii CECT_8489	Yoonia sediminilitoris DSM_29955	91.4247	0.9213	66.28	81.5055	86.2909	46.4671
Boseongicola aestuarii CECT_8489	Yoonia tamlensis DSM_26879	91.2281	0.9334	65.47	81.3271	86.0755	46.2797
Boseongicola aestuarii CECT_8489	Yoonia vestfoldensis DSM_16212	91.7004	0.9794	65.85	81.4402	85.9268	49.4116
Brevirhabdus pacifica 22DY15	Acuticoccus yangtzensis JL1095	88.9566	2.1137	54.49	68.0456	72.795	51.9314
Brevirhabdus pacifica 22DY15	Ahrensia kielensis DSM_5890	86.8842	2.1065	54.32	66.221	73.1745	32.286
Brevirhabdus pacifica 22DY15	Ahrensia marina LZD062	86.3515	2.0994	54.85	66.8036	73.499	35.6742
Brevirhabdus pacifica 22DY15	Albimonas donghaensis DSM_17890	88.7838	1.2001	60.77	76.6681	79.9509	58.7626
Brevirhabdus pacifica 22DY15	Albimonas pacifica CGMCC_1.11030	89.9865	1.1961	60.85	76.5436	79.6019	59.743
Brevirhabdus pacifica 22DY15	Aliiroseovarius halocynthiae MA1_10_1	94.1097	0.8327	66.07	80.8135	84.7958	50.5971
Brevirhabdus pacifica 22DY15	Aliiroseovarius pelagivivens CECT_8811	92.915	0.8355	66.01	80.9847	84.8315	51.7102
Brevirhabdus pacifica 22DY15	Amylibacter kogurei strain_4G11	91.1606	1.0237	63.08	75.036	82.2064	38.2883
Brevirhabdus pacifica 22DY15	Boseongicola aestuarii CECT_8489	93.3153	0.691	66.33	81.0052	84.993	49.5253
Brevirhabdus pacifica 22DY15	Cereibacter changlensis DSM_18774	91.063	0.8514	66.32	81.5265	84.3885	61.1675
Brevirhabdus pacifica 22DY15	Cognatiyoonia koreensis DSM_17925	94.3205	0.9092	66.17	80.3689	84.6059	47.6652
Brevirhabdus pacifica 22DY15	Cognatiyoonia sediminum DSM_28715	93.3424	0.96	65.97	79.5116	84.5697	44.8957
Brevirhabdus pacifica 22DY15	Dinoroseobacter shibae DFL_12	92.6202	0.7602	67.05	82.372	85.352	58.9064
Brevirhabdus pacifica 22DY15	Haematobacter massiliensis CCUG_47968	90.7659	0.8754	65.33	80.8931	83.9888	54.3577
Brevirhabdus pacifica 22DY15	Haematobacter missouriensis H1892	91.2897	0.8744	64.7	80.6698	83.8646	53.571
Brevirhabdus pacifica 22DY15	Hasllibacter halocynthiae DSM_29318	93.6949	0.9025	64.35	78.7905	81.5469	58.0592
Brevirhabdus pacifica 22DY15	Hwanghaeicola aestuarii DSM_22009	90.6021	0.7714	65.25	81.5843	84.6551	55.6566
Brevirhabdus pacifica 22DY15	Jannaschia aquimarina GSW-M26	90.8108	0.9109	64.47	80.2431	83.376	56.5554
Brevirhabdus pacifica 22DY15	Jannaschia donghaensis CECT_7802	92.6252	0.9907	65.06	79.4133	83.3135	55.9302
Brevirhabdus pacifica 22DY15	Jannaschia faecimaris DSM_100420	92.3545	0.9726	65.22	79.749	83.7712	54.2296
Brevirhabdus pacifica 22DY15	Jannaschia helgolandensis DSM_14858	92.2973	0.9532	65.9	79.8728	83.5943	54.2564
Brevirhabdus pacifica 22DY15	Jannaschia pohangensis DSM_19073	92.5	0.9069	65.42	80.5484	83.7746	57.7853
Brevirhabdus pacifica 22DY15	Jannaschia rubra CECT_5088	91.954	0.9725	65.64	80.7548	83.7624	58.1099
Brevirhabdus pacifica 22DY15	Jannaschia seohaensis DSM_25227	91.6892	0.8887	65.7	80.537	83.6012	59.1582
Brevirhabdus pacifica 22DY15	Kandeliimicrobium roseum XY-R6	92.0778	0.6989	67.67	82.5306	85.3317	62.0823
Brevirhabdus pacifica 22DY15	Leisingera aquaemixtae CECT_8399	93.1711	0.9766	66.38	82.5467	85.6227	59.5504
Brevirhabdus pacifica 22DY15	Leisingera aquimarina DSM_24565	92.9682	0.9711	66.42	81.9703	85.3821	56.3098
Brevirhabdus pacifica 22DY15	Leisingera caerulea DSM_24564	93.279	0.9686	66.32	82.2724	85.4516	58.7632
Brevirhabdus pacifica 22DY15	Leisingera daeponensis DSM_23529	92.9682	0.9756	66.33	82.6574	85.696	59.7079
Brevirhabdus pacifica 22DY15	Leisingera methylohalidivorans DSM_14336	93.3873	0.9901	66.61	81.7165	85.055	56.845
Brevirhabdus pacifica 22DY15	Limimaricola cinnabarinus LL-001	92.1569	1.0186	65.82	76.2092	79.253	56.1694
Brevirhabdus pacifica 22DY15	Limimaricola hongkongensis DSM_17492	92.3494	0.969	66.39	82.159	85.0429	61.8471
Brevirhabdus pacifica 22DY15	Limimaricola pyoseonensis DSM_21424	91.2103	0.9474	66.56	82.6365	85.4251	63.5439
Brevirhabdus pacifica 22DY15	Limimaricola soesokkakensis CECT_8367	92.0216	0.9955	66.43	81.8709	84.8764	60.955
Brevirhabdus pacifica 22DY15	Litoreibacter albidus DSM_26922	93.9824	0.936	66.47	80.304	84.8853	51.1276
Brevirhabdus pacifica 22DY15	Litoreibacter ascidiaceicola DSM_100566	93.7796	0.9172	67.48	80.5254	84.9503	51.3845
Brevirhabdus pacifica 22DY15	Litoreibacter halocynthiae MA1-10_1	94.5836	0.9206	68.26	80.6173	84.982	51.0517
Brevirhabdus pacifica 22DY15	Litoreibacter janthinus DSM_26921	94.1256	0.8977	67	80.5864	84.9531	49.4703
Brevirhabdus pacifica 22DY15	Litoreibacter meonggei DSM_29466	95.0642	0.9165	67.22	80.3808	84.7751	50.9377
Brevirhabdus pacifica 22DY15	Loktanella atrilutea DSM_29326	92.027	0.9537	65.56	81.457	84.5742	58.9015
Brevirhabdus pacifica 22DY15	Loktanella fryxellensis DSM_16213	91.8354	0.9632	65.07	80.5646	83.576	58.5338
Brevirhabdus pacifica 22DY15	Loktanella salsilacus DSM_16199	92.0892	0.9518	65.22	80.3864	84.1175	52.7668
Brevirhabdus pacifica 22DY15	Monaibacterium marinum C7	89.9324	1.03	62.69	78.035	82.1331	49.5346
Brevirhabdus pacifica 22DY15	Neptunicoccus sediminis CY02	91.9083	0.9164	65.14	79.2681	83.3602	47.6169
Brevirhabdus pacifica 22DY15	Nioella nitratireducens SSW136	92.3649	0.7646	67.64	81.9833	85.5013	57.422
Brevirhabdus pacifica 22DY15	Nioella sediminis JS7-11	92.7654	0.7377	66.72	82.2655	85.5199	57.5044
Brevirhabdus pacifica 22DY15	Oceanicella actignis CGMCC_1.10808	89.6312	1.1532	62.78	78.2037	81.3827	60.7133
Brevirhabdus pacifica 22DY15	Oceaniglobus indicus 1-19b	93.9905	0.7282	67.63	82.0669	85.4194	58.2905
Brevirhabdus pacifica 22DY15	Oceaniovalibus guishaninsula JLT2003	91.8298	0.8102	67.14	79.9369	82.832	57.9554
Brevirhabdus pacifica 22DY15	Octadecabacter antarcticus 307	93.9702	0.9507	65.05	78.2006	83.0476	44.7752
Brevirhabdus pacifica 22DY15	Octadecabacter arcticus 238	93.7162	0.9473	65.36	78.2219	83.0925	45.6201
Brevirhabdus pacifica 22DY15	Octadecabacter ascidiaceicola CECT_8868	93.9024	0.9083	65.36	79.1474	83.6731	44.7443
Brevirhabdus pacifica 22DY15	Octadecabacter temperatus SB1	93.6314	0.9039	64.94	78.9289	83.513	43.8837
Brevirhabdus pacifica 22DY15	Paenirhodobacter enshiensis DW2-9	90.1811	1.0531	63.6	79.3965	82.6689	58.7842
Brevirhabdus pacifica 22DY15	Palleronia abyssalis CECT_8504	92.678	0.8497	66.23	80.7727	84.4836	57.1865
Brevirhabdus pacifica 22DY15	Palleronia marisminoris CECT_7066	91.8809	0.847	65.42	81.3712	84.6559	59.8808
Brevirhabdus pacifica 22DY15	Pararhodobacter aggregans D1-19	90.9459	0.9152	63.95	79.9588	82.9109	59.8109
Brevirhabdus pacifica 22DY15	Pararhodobacter marinus CIC4N-9	91.4073	0.9003	64.66	79.9602	83.053	58.8084
Brevirhabdus pacifica 22DY15	Phaeobacter gallaeciensis DSM_26640	93.4415	0.9879	66.6	81.3711	84.8105	52.2135
Brevirhabdus pacifica 22DY15	Phaeobacter inhibens DSM_16374	93.4415	0.9797	66.55	81.4439	84.8403	52.3711
Brevirhabdus pacifica 22DY15	Phaeobacter italicus CECT_7645	93.7712	0.9692	66.64	81.6245	84.8714	53.3063
Brevirhabdus pacifica 22DY15	Phaeobacter porticola strain_P97	93.6529	0.997	66.73	81.0865	84.8002	50.7647
Brevirhabdus pacifica 22DY15	Pontivivens insulae CeCT_8812	89.3991	0.9957	62.39	78.5233	82.4753	49.8925
Brevirhabdus pacifica 22DY15	Pseudophaeobacter arcticus DSM_23566	92.9682	0.9996	67.3	80.8167	84.4338	52.1128
Brevirhabdus pacifica 22DY15	Pseudophaeobacter leonis 306	92.235	1.0322	65.42	72.8982	76.1873	46.2737
Brevirhabdus pacifica 22DY15	Pseudoroseicyclus aestuarii CECT_9025	91.5483	1.0362	64.73	80.6681	83.3667	61.4142
Brevirhabdus pacifica 22DY15	Rhodobaca barguzinensis alga05	90.4054	0.9066	64.6	80.0103	83.8567	49.0424
Brevirhabdus pacifica 22DY15	Rhodovulum imhoffii DSM_18064	90.3509	0.7323	68.09	82.2851	85.4538	54.1187
Brevirhabdus pacifica 22DY15	Rhodovulum kholense DSM_19783	90.3378	0.7259	67.57	83.0023	85.7143	61.5346
Brevirhabdus pacifica 22DY15	Rhodovulum robiginosum DSM_12329	90.7432	0.7023	68.66	82.8812	85.7242	61.2359
Brevirhabdus pacifica 22DY15	Rhodovulum sulfidophilum DSM_1374	90.6081	0.7505	67.59	82.4688	85.1724	61.2206
Brevirhabdus pacifica 22DY15	Rhodovulum viride JA756	90.3989	0.7273	67.43	82.9578	85.6576	61.4095
Brevirhabdus pacifica 22DY15	Roseibaca calidilacus HL-91	90.2768	0.9247	65.24	79.1564	83.3638	51.9317
Brevirhabdus pacifica 22DY15	Roseibaca ekhonensis CECT_7235	90.0743	0.9366	64.99	79.3007	83.4413	52.1528
Brevirhabdus pacifica 22DY15	Roseibacterium elongatum DSM_19469	92.915	0.7875	66.48	78.839	81.9847	57.0886
Brevirhabdus pacifica 22DY15	Roseicitreum antarcticum CGMCC_1.8894	90.7495	0.876	65.73	80.3076	83.9367	54.414
Brevirhabdus pacifica 22DY15	Roseicyclus mahoneyensis DSM_16097	92.2192	0.8043	65.64	81.0996	84.307	57.9032
Brevirhabdus pacifica 22DY15	Roseinatronobacter thiooxidans ALG1	90.6144	0.9075	64.65	79.8364	83.7669	50.7648
Brevirhabdus pacifica 22DY15	Rubrimonas cliftonensis DSM_15345	87.0358	1.2913	60.04	76.2243	79.3312	57.1178
Brevirhabdus pacifica 22DY15	Shimia haliotis DSM_28453	94.1176	0.8749	66.17	81.0633	85.0771	50.461
Brevirhabdus pacifica 22DY15	Shimia isoporae SW6_1	93.6401	0.8771	66.03	80.3822	84.5968	47.3169
Brevirhabdus pacifica 22DY15	Shimia marina CECT_7688	93.8263	0.8921	67.03	80.6858	84.3829	48.5887
Brevirhabdus pacifica 22DY15	Shimia sagamensis JAMH011_1	94.3767	0.8888	65.91	80.3151	84.5454	47.1647
Brevirhabdus pacifica 22DY15	Silicimonas algicola DSM_103371	92.5625	0.7285	66.12	81.8738	84.9683	58.1916
Brevirhabdus pacifica 22DY15	Tabrizicola aquatica RCRI19	90.473	0.9794	64.88	79.6576	83.096	57.9586
Brevirhabdus pacifica 22DY15	Thalassobacter stenotrophicus CECT_5294	92.5926	0.8079	67.02	80.4246	84.3987	48.5962
Brevirhabdus pacifica 22DY15	Thioclava arenosa CAU_1312	91.0074	0.9423	66.05	80.5418	83.595	58.4367
Brevirhabdus pacifica 22DY15	Thioclava atlantica 13D2W-2	92.3752	1.0114	65.48	80.762	83.9651	58.2925
Brevirhabdus pacifica 22DY15	Thioclava dalianensis strain_DLFJ1-1	92.1106	1.0604	65.37	80.0518	83.4153	54.8286
Brevirhabdus pacifica 22DY15	Thioclava electrotropha Elox9	91.8298	1.037	64.74	80.2017	83.5992	57.2965
Brevirhabdus pacifica 22DY15	Thioclava indica strain_DT23-4	92.3077	1.0297	64.69	79.7406	83.7574	52.4522
Brevirhabdus pacifica 22DY15	Thioclava marina 11-10-0-13	91.8974	1.0168	65.44	81.0849	84.3767	57.5788
Brevirhabdus pacifica 22DY15	Thioclava nitratireducens 25B10_4	91.9649	1.0307	64.85	80.3273	83.756	57.1107
Brevirhabdus pacifica 22DY15	Thioclava pacifica DSM_10166	92.0324	1.01	65.26	80.8046	84.097	57.0344
Brevirhabdus pacifica 22DY15	Thioclava sediminum TAW-CT134	91.8298	1.0328	64.89	80.0628	83.4156	57.2733
Brevirhabdus pacifica 22DY15	Tranquillimonas alkanivorans DSM_19547	90.4519	0.6607	68.37	83.5458	86.4179	61.741
Brevirhabdus pacifica 22DY15	Wenxinia marina DSM_24838	92.027	0.9612	66.29	81.6364	84.3276	61.0483
Brevirhabdus pacifica 22DY15	Wenxinia saemankumensis DSM_100565	92.6351	0.9846	65.42	81.1558	83.5591	60.8452
Brevirhabdus pacifica 22DY15	Yoonia litorea DSM_29433	93.5637	0.9769	66.72	80.8456	85.0504	48.9804
Brevirhabdus pacifica 22DY15	Yoonia maricola DSM_29128	94.7262	0.9433	65.94	80.577	85.1054	47.0623
Brevirhabdus pacifica 22DY15	Yoonia maritima DSM_101533	94.2529	0.9053	66.44	80.1832	84.8215	42.8849
Brevirhabdus pacifica 22DY15	Yoonia rosea DSM_29591	94.5909	0.9313	66.36	80.7197	84.6406	49.5769
Brevirhabdus pacifica 22DY15	Yoonia sediminilitoris DSM_29955	94.3805	0.9111	66.11	80.5888	84.8402	49.1957
Brevirhabdus pacifica 22DY15	Yoonia tamlensis DSM_26879	93.6529	0.9232	66.23	80.3104	84.5998	47.7653
Brevirhabdus pacifica 22DY15	Yoonia vestfoldensis DSM_16212	92.1675	0.9691	66.88	80.8559	84.4885	54.8825
Cereibacter changlensis DSM_18774	Ahrensia kielensis DSM_5890	87.217	2.0775	53.61	66.9312	74.0911	32.6841
Cereibacter changlensis DSM_18774	Ahrensia marina LZD062	86.8088	2.0704	53.78	67.2293	73.9786	36.155
Cereibacter changlensis DSM_18774	Jannaschia donghaensis CECT_7802	90.2768	1.024	63.11	80.0536	84.0976	56.4807
Cereibacter changlensis DSM_18774	Jannaschia faecimaris DSM_100420	90.1418	1.0059	63.26	80.4546	84.5818	54.5036
Cereibacter changlensis DSM_18774	Jannaschia helgolandensis DSM_14858	90.0135	0.9866	63.13	80.3901	84.4348	55.4925
Cereibacter changlensis DSM_18774	Leisingera aquaemixtae CECT_8399	90.737	1.041	64.55	82.4386	85.4623	61.269
Cereibacter changlensis DSM_18774	Leisingera aquimarina DSM_24565	90.0943	1.0355	64.07	81.8861	85.2453	57.4058
Cereibacter changlensis DSM_18774	Leisingera caerulea DSM_24564	91.4518	1.033	64.43	82.1625	85.3498	60.0385
Cereibacter changlensis DSM_18774	Leisingera daeponensis DSM_23529	89.8854	1.04	64.56	82.4776	85.4582	61.1923
Cereibacter changlensis DSM_18774	Leisingera methylohalidivorans DSM_14336	89.8316	1.0546	64.92	82.2421	85.5871	58.4319
Cereibacter changlensis DSM_18774	Paenirhodobacter enshiensis DW2-9	93.0866	0.7687	65.73	82.9336	86.1179	64.3453
Cereibacter changlensis DSM_18774	Palleronia abyssalis CECT_8504	90.1218	1.0203	63.11	80.5203	84.0571	57.4755
Cereibacter changlensis DSM_18774	Palleronia marisminoris CECT_7066	89.264	1.0177	63.27	81.2318	84.5184	60.8505
Cereibacter changlensis DSM_18774	Phaeobacter gallaeciensis DSM_26640	90.6018	1.0523	64.92	81.8154	85.4158	53.2164
Cereibacter changlensis DSM_18774	Phaeobacter inhibens DSM_16374	90.6018	1.0441	64.49	81.9142	85.5125	53.656
Cereibacter changlensis DSM_18774	Phaeobacter italicus CECT_7645	90.8046	1.0336	64.63	82.0024	85.4357	53.5985
Cereibacter changlensis DSM_18774	Phaeobacter porticola strain_P97	90.1684	1.0615	64.9	81.4758	85.3624	51.5387
Cereibacter changlensis DSM_18774	Tabrizicola aquatica RCRI19	93.5047	0.5324	70.44	85.4601	88.3342	63.3676
Cereibacter changlensis DSM_18774	Thioclava arenosa CAU_1312	92.6978	0.6578	67.56	83.9314	86.8543	62.8912
Cereibacter changlensis DSM_18774	Thioclava atlantica 13D2W-2	93.0452	0.727	66.13	84.0175	86.9984	63.6305
Cereibacter changlensis DSM_18774	Thioclava dalianensis strain_DLFJ1-1	92.3129	0.7759	65.03	83.019	86.3012	58.234
Cereibacter changlensis DSM_18774	Thioclava electrotropha Elox9	92.8427	0.7526	65.26	83.3947	86.5941	61.8712
Cereibacter changlensis DSM_18774	Thioclava indica strain_DT23-4	92.9198	0.7453	65.58	83.0833	87.0126	55.2631
Cereibacter changlensis DSM_18774	Thioclava marina 11-10-0-13	92.5726	0.7324	66.2	83.8761	86.953	62.0813
Cereibacter changlensis DSM_18774	Thioclava nitratireducens 25B10_4	92.5876	0.7463	65.44	83.6248	86.7668	61.7521
Cereibacter changlensis DSM_18774	Thioclava pacifica DSM_10166	92.3854	0.7255	66.49	83.9905	87.1366	61.8171
Cereibacter changlensis DSM_18774	Thioclava sediminum TAW-CT134	92.5202	0.7484	65.26	83.287	86.5005	61.8406
Cereibacter changlensis DSM_18774	Yoonia maricola DSM_29128	90.1961	1.0077	63.94	80.7436	85.3153	47.3871
Cereibacter changlensis DSM_18774	Yoonia rosea DSM_29591	89.858	0.9957	64.56	81.4661	85.4356	49.9858
Citreimonas salinaria DSM_26880	Acuticoccus yangtzensis JL1095	87.846	2.3119	53.49	68.1925	72.9302	53.9289
Citreimonas salinaria DSM_26880	Aestuariivita boseongensis BS-B2	91.95	0.7376	68.19	84.2778	87.5049	56.5148
Citreimonas salinaria DSM_26880	Ahrensia kielensis DSM_5890	85.4582	2.3047	53.84	66.4218	73.2152	32.1351
Citreimonas salinaria DSM_26880	Ahrensia marina LZD062	85.9801	2.2976	54.11	66.6401	73.1369	35.2623
Citreimonas salinaria DSM_26880	Albimonas donghaensis DSM_17890	88.8889	1.3983	59.85	76.2341	79.6619	59.9829
Citreimonas salinaria DSM_26880	Albimonas pacifica CGMCC_1.11030	89.9324	1.3943	59.55	76.0108	79.4306	61.5058
Citreimonas salinaria DSM_26880	Aliiroseovarius crassostreae CV919-312	90.8968	0.9045	64.53	81.3878	84.9229	51.2567
Citreimonas salinaria DSM_26880	Aliiroseovarius halocynthiae MA1_10_1	91.3396	0.9147	64.63	80.9986	85.0991	50.4658
Citreimonas salinaria DSM_26880	Aliiroseovarius pelagivivens CECT_8811	91.0256	0.9175	64.72	81.1131	85.0498	51.7182
Citreimonas salinaria DSM_26880	Aliiroseovarius sediminilitoris DSM_29439	90.9704	0.9433	64.89	80.7466	84.9195	51.5755
Citreimonas salinaria DSM_26880	Amylibacter kogurei strain_4G11	89.2857	1.2219	61.41	74.1811	81.3937	36.8253
Citreimonas salinaria DSM_26880	Antarctobacter heliothermus DSM_11445	91.9946	0.536	71.19	85.834	88.864	59.3652
Citreimonas salinaria DSM_26880	Aquimixticola soesokkakensis CECT_8620	93.5047	0.9349	64	80.5131	84.3864	53.2638
Citreimonas salinaria DSM_26880	Ascidiaceihabitans donghaensis CECT_8599	93.0122	0.827	66.24	80.1797	85.6488	45.7987
Citreimonas salinaria DSM_26880	Boseongicola aestuarii CECT_8489	92.1106	0.9954	65.33	81.1042	85.2538	50.063
Citreimonas salinaria DSM_26880	Brevirhabdus pacifica 22DY15	91.9649	0.9852	66.31	81.3291	84.1981	61.547
Citreimonas salinaria DSM_26880	Cereibacter changlensis DSM_18774	90.4248	1.0496	64.1	81.2984	84.392	62.7494
Citreimonas salinaria DSM_26880	Cognatishimia maritima DSM_28223	93.0264	0.7809	65.91	81.3969	85.866	48.0239
Citreimonas salinaria DSM_26880	Cognatiyoonia koreensis DSM_17925	92.8136	0.9457	65.08	80.5131	84.8824	48.0408
Citreimonas salinaria DSM_26880	Cognatiyoonia sediminum DSM_28715	91.5426	0.9964	65.14	79.8835	85.1643	45.2865
Citreimonas salinaria DSM_26880	Cribrihabitans marinus DSM_29340	94.6622	0.8039	67.73	83.969	86.7577	63.7458
Citreimonas salinaria DSM_26880	Dinoroseobacter shibae DFL_12	91.475	0.9583	65.86	82.0695	85.1052	59.7371
Citreimonas salinaria DSM_26880	Donghicola eburneus DSM_29127	94.2412	0.7624	66	82.1079	85.8099	53.4206
Citreimonas salinaria DSM_26880	Donghicola tyrosinivorans DSM_100212	93.3828	0.7598	66.07	82.4245	85.8403	53.7644
Citreimonas salinaria DSM_26880	Flavimaricola marinus CECT_8899	91.8133	0.8917	65.24	81.6567	85.3087	55.5374
Citreimonas salinaria DSM_26880	Haematobacter massiliensis CCUG_47968	90.4422	1.0736	63.38	80.6666	83.8918	55.2243
Citreimonas salinaria DSM_26880	Haematobacter missouriensis H1892	90.8479	1.0726	63.2	80.5754	83.801	54.6906
Citreimonas salinaria DSM_26880	Halocynthiibacter arcticus PAMC_20958	90.3704	0.9866	63.66	76.2621	81.3657	40.7095
Citreimonas salinaria DSM_26880	Halocynthiibacter namhaensis RA2-3	90.1484	0.965	64.02	78.2621	83.5254	40.9771
Citreimonas salinaria DSM_26880	Hasllibacter halocynthiae DSM_29318	91.2221	1.2585	63.38	79.0725	81.9103	60.5704
Citreimonas salinaria DSM_26880	Hwanghaeicola aestuarii DSM_22009	89.9049	1.0758	64.85	81.762	84.6992	58.1455
Citreimonas salinaria DSM_26880	Jannaschia aquimarina GSW-M26	90.7557	1.1091	63.68	80.4617	83.6199	58.1076
Citreimonas salinaria DSM_26880	Jannaschia donghaensis CECT_7802	90.1077	1.1888	63.82	79.7616	83.777	56.6165
Citreimonas salinaria DSM_26880	Jannaschia faecimaris DSM_100420	89.7039	1.1708	63.94	80.062	84.1074	54.957
Citreimonas salinaria DSM_26880	Jannaschia helgolandensis DSM_14858	90.5533	1.1514	64	80.0014	83.9845	54.9169
Citreimonas salinaria DSM_26880	Jannaschia pohangensis DSM_19073	91.0377	1.1051	64.24	80.9297	84.1684	58.5694
Citreimonas salinaria DSM_26880	Jannaschia rubra CECT_5088	90.8294	1.1707	64.31	80.8309	83.9192	59.836
Citreimonas salinaria DSM_26880	Jannaschia seohaensis DSM_25227	91.1606	1.0869	64.33	81.151	84.203	60.8008
Citreimonas salinaria DSM_26880	Jhaorihella thermophila DSM_23413	91.1486	0.8351	67.32	83.093	86.1838	61.5177
Citreimonas salinaria DSM_26880	Kandeliimicrobium roseum XY-R6	91.2378	1.0033	65.64	82.2792	85.0648	63.6878
Citreimonas salinaria DSM_26880	Leisingera aquaemixtae CECT_8399	94.844	0.9366	66.45	83.4881	86.4901	60.8033
Citreimonas salinaria DSM_26880	Leisingera aquimarina DSM_24565	93.8305	0.9312	66.27	82.8797	86.2622	57.0749
Citreimonas salinaria DSM_26880	Leisingera caerulea DSM_24564	93.1757	0.9286	66.21	83.2023	86.3737	59.916
Citreimonas salinaria DSM_26880	Leisingera daeponensis DSM_23529	93.4459	0.9357	66.48	83.6143	86.5796	60.9704
Citreimonas salinaria DSM_26880	Leisingera methylohalidivorans DSM_14336	93.6486	0.9502	66.76	82.6611	85.9498	57.6309
Citreimonas salinaria DSM_26880	Limimaricola cinnabarinus LL-001	93.6228	1.055	65.6	76.441	79.4745	57.7104
Citreimonas salinaria DSM_26880	Limimaricola hongkongensis DSM_17492	93.6821	1.0054	66.1	82.5149	85.4957	63.9948
Citreimonas salinaria DSM_26880	Limimaricola pyoseonensis DSM_21424	93.4193	0.9839	65.7	82.8965	85.8569	66.3754
Citreimonas salinaria DSM_26880	Limimaricola soesokkakensis CECT_8367	93.0122	1.0319	65.57	82.2489	85.3339	62.7691
Citreimonas salinaria DSM_26880	Litoreibacter albidus DSM_26922	89.697	0.9724	64.52	79.7393	84.5974	51.8074
Citreimonas salinaria DSM_26880	Litoreibacter arenae DSM_19593	91.2458	0.914	64.63	80.5153	84.8062	55.3583
Citreimonas salinaria DSM_26880	Litoreibacter ascidiaceicola DSM_100566	89.7643	0.9536	64.5	79.8749	84.5909	51.737
Citreimonas salinaria DSM_26880	Litoreibacter halocynthiae MA1-10_1	90.762	0.957	64.4	79.904	84.5497	51.3705
Citreimonas salinaria DSM_26880	Litoreibacter janthinus DSM_26921	90.682	0.9341	64.45	79.9487	84.6999	49.6902
Citreimonas salinaria DSM_26880	Litoreibacter meonggei DSM_29466	91.234	0.9529	64.46	79.6889	84.522	51.3361
Citreimonas salinaria DSM_26880	Litoreibacter ponti DSM_100977	91.069	0.8969	64.8	81.3801	84.8675	58.2073
Citreimonas salinaria DSM_26880	Litorimicrobium taeanense DSM_22007	92.1159	0.7378	67.51	82.7844	86.3125	55.2957
Citreimonas salinaria DSM_26880	Loktanella atrilutea DSM_29326	92.3442	0.9902	65.05	82.0518	85.335	60.9076
Citreimonas salinaria DSM_26880	Loktanella fryxellensis DSM_16213	91.3396	0.9996	64.55	81.0969	84.232	60.0114
Citreimonas salinaria DSM_26880	Loktanella salsilacus DSM_16199	91.1486	0.9882	64.6	80.9383	84.8749	53.142
Citreimonas salinaria DSM_26880	Maliponia aquimaris CECT_8898	93.6778	0.5354	71.25	86.1078	88.7182	66.8152
Citreimonas salinaria DSM_26880	Mameliella alba CGMCC_1.7290	92.7507	0.5191	71.54	86.2435	88.8948	63.8036
Citreimonas salinaria DSM_26880	Marinibacterium profundimaris 22II1-22F33	92	0.8614	66.69	82.9969	85.9817	63.4272
Citreimonas salinaria DSM_26880	Marinovum algicola FF3	94.2373	0.6805	67.85	84.2131	87.1437	61.758
Citreimonas salinaria DSM_26880	Maritimibacter alkaliphilus HTCC2654	92.7849	0.9257	64.42	81.6673	84.9946	58.6925
Citreimonas salinaria DSM_26880	Marivita cryptomonadis CL-SK44	92.9054	0.608	69.83	84.5556	88.0373	54.2236
Citreimonas salinaria DSM_26880	Marivita geojedonensis DPG-138	93.7838	0.5859	70.3	85.8146	88.7147	56.243
Citreimonas salinaria DSM_26880	Marivita hallyeonensis DSM_29431	93.7162	0.5867	69.62	84.6631	88.0624	55.2278
Citreimonas salinaria DSM_26880	Marivivens niveibacter MCCC_1A06712	91.9431	0.9185	64.94	80.4768	85.074	47.0925
Citreimonas salinaria DSM_26880	Monaibacterium marinum C7	91.8133	1.2282	61.52	77.5327	82.0414	50.0603
Citreimonas salinaria DSM_26880	Neptunicoccus sediminis CY02	89.6714	1.1146	62.21	78.3582	82.5882	46.8996
Citreimonas salinaria DSM_26880	Nereida ignava CECT_5292	90.8722	0.9094	65.54	79.3448	84.4842	42.3407
Citreimonas salinaria DSM_26880	Nioella nitratireducens SSW136	91.8298	0.9628	65.05	82.1748	85.6549	57.9582
Citreimonas salinaria DSM_26880	Nioella sediminis JS7-11	91.8464	0.9359	65.3	81.9273	85.0736	57.5796
Citreimonas salinaria DSM_26880	Oceanicella actignis CGMCC_1.10808	91.1806	1.3514	61.44	77.6893	80.7147	62.1324
Citreimonas salinaria DSM_26880	Oceaniglobus indicus 1-19b	91.9192	1.0326	65.33	82.0846	85.3773	59.2098
Citreimonas salinaria DSM_26880	Oceaniovalibus guishaninsula JLT2003	91.9757	1.1146	65.53	79.9076	82.9293	59.6143
Citreimonas salinaria DSM_26880	Octadecabacter antarcticus 307	90.4922	0.9871	65.02	79.1598	84.04	45.784
Citreimonas salinaria DSM_26880	Octadecabacter arcticus 238	90.6334	0.9837	65.57	79.1011	83.9013	46.3525
Citreimonas salinaria DSM_26880	Octadecabacter ascidiaceicola CECT_8868	90.4248	0.9448	65.16	79.843	84.4741	45.5283
Citreimonas salinaria DSM_26880	Octadecabacter temperatus SB1	90.2225	0.9404	64.68	79.5547	84.3512	44.3214
Citreimonas salinaria DSM_26880	Pacificibacter marinus DSM_25228	91.363	0.9819	63.29	77.7811	84.0469	40.7963
Citreimonas salinaria DSM_26880	Pacificibacter maritimus DSM_104731	91.498	0.9838	63.52	77.762	84.1821	40.3265
Citreimonas salinaria DSM_26880	Paenirhodobacter enshiensis DW2-9	90.5621	1.2513	62.58	79.5196	82.9041	60.7527
Citreimonas salinaria DSM_26880	Palleronia abyssalis CECT_8504	91.2897	1.1541	66.01	81.4256	84.9903	58.5996
Citreimonas salinaria DSM_26880	Palleronia marisminoris CECT_7066	90.8294	1.1514	66.18	81.931	85.2867	62.3725
Citreimonas salinaria DSM_26880	Pararhodobacter aggregans D1-19	90.9091	1.1134	62.68	79.9362	83.106	60.8505
Citreimonas salinaria DSM_26880	Pararhodobacter marinus CIC4N-9	92.1569	1.0985	62.96	79.9302	82.9782	60.2324
Citreimonas salinaria DSM_26880	Phaeobacter gallaeciensis DSM_26640	93.6949	0.948	66.87	82.3717	85.9391	52.5804
Citreimonas salinaria DSM_26880	Phaeobacter inhibens DSM_16374	93.4237	0.9398	66.35	82.4254	85.9085	52.6725
Citreimonas salinaria DSM_26880	Phaeobacter italicus CECT_7645	93.6735	0.9293	66.7	82.4776	85.9236	53.5878
Citreimonas salinaria DSM_26880	Phaeobacter porticola strain_P97	92.973	0.9571	66.47	82.0517	85.8337	50.8702
Citreimonas salinaria DSM_26880	Planktomarina temperata RCA23	91.2221	0.998	64.37	77.3842	83.3061	42.1569
Citreimonas salinaria DSM_26880	Planktotalea arctica IMCC9565	90.5433	0.8182	66.72	81.3676	85.5544	48.701
Citreimonas salinaria DSM_26880	Planktotalea frisia SH6-1	91.2955	0.8295	66.27	79.9936	85.1609	43.0695
Citreimonas salinaria DSM_26880	Pontivivens insulae CeCT_8812	91.1606	1.1939	61.38	77.9727	82.2921	49.8538
Citreimonas salinaria DSM_26880	Poseidonocella pacifica DSM_29316	94.501	0.7748	67.51	82.6498	86.3263	52.3314
Citreimonas salinaria DSM_26880	Poseidonocella sedimentorum KMM_9023	93.3018	0.7827	67.06	83.4774	86.3013	59.2215
Citreimonas salinaria DSM_26880	Pseudaestuariivita atlantica 22II-S11-z3	93.1757	0.7437	67.06	83.3153	86.0898	62.0335
Citreimonas salinaria DSM_26880	Pseudodonghicola xiamenensis DSM_18339	94.836	0.8273	66.93	82.9403	86.2038	58.6665
Citreimonas salinaria DSM_26880	Pseudooctadecabacter jejudonensis CECT_8397	91.5483	0.8876	65.41	80.3891	84.9007	50.653
Citreimonas salinaria DSM_26880	Pseudopelagicola gijangensis DSM_100564	91.2399	0.7956	66.75	81.172	85.903	46.4122
Citreimonas salinaria DSM_26880	Pseudophaeobacter arcticus DSM_23566	92.5373	0.9597	65.83	81.5265	85.2418	51.2213
Citreimonas salinaria DSM_26880	Pseudophaeobacter leonis 306	91.5541	0.9922	65.36	73.3543	76.4976	45.5839
Citreimonas salinaria DSM_26880	Pseudoroseicyclus aestuarii CECT_9025	93.6906	1.0726	64.69	81.3335	84.1416	62.899
Citreimonas salinaria DSM_26880	Puniceibacterium antarcticum SM1211	93.7669	0.642	69.7	84.082	87.1419	55.9938
Citreimonas salinaria DSM_26880	Puniceibacterium sediminis DSM_29052	93.7754	0.6375	70.33	84.4274	87.6269	56.7983
Citreimonas salinaria DSM_26880	Rhodobaca barguzinensis alga05	90.9704	1.1048	63.39	79.85	83.991	49.029
Citreimonas salinaria DSM_26880	Rhodosalinus sediminis WDN1C137	92.1316	0.8877	68.61	83.3479	85.7925	64.5657
Citreimonas salinaria DSM_26880	Rhodovulum imhoffii DSM_18064	92.5575	0.976	66.46	81.9511	85.4747	54.5296
Citreimonas salinaria DSM_26880	Rhodovulum kholense DSM_19783	91.6948	0.9696	65.88	82.7399	85.7232	62.3827
Citreimonas salinaria DSM_26880	Rhodovulum robiginosum DSM_12329	92.1053	0.9461	66.78	82.6086	85.6419	62.8076
Citreimonas salinaria DSM_26880	Rhodovulum sulfidophilum DSM_1374	91.7623	0.9943	66.29	82.1885	85.129	61.7026
Citreimonas salinaria DSM_26880	Rhodovulum viride JA756	91.7568	0.9711	65.96	82.6785	85.5787	62.2861
Citreimonas salinaria DSM_26880	Roseibaca calidilacus HL-91	92.1053	1.1229	63.84	79.329	83.5096	52.5553
Citreimonas salinaria DSM_26880	Roseibaca ekhonensis CECT_7235	91.9703	1.1348	63.57	79.3121	83.4748	52.948
Citreimonas salinaria DSM_26880	Roseibacterium elongatum DSM_19469	93.1664	0.9857	65.67	79.1483	82.317	58.2434
Citreimonas salinaria DSM_26880	Roseicitreum antarcticum CGMCC_1.8894	91.3805	1.0742	64.18	80.0353	83.7576	55.1874
Citreimonas salinaria DSM_26880	Roseicyclus mahoneyensis DSM_16097	91.7172	1.0025	65.32	81.9351	85.3659	59.4684
Citreimonas salinaria DSM_26880	Roseinatronobacter thiooxidans ALG1	91.5152	1.1057	63.74	79.7946	83.8825	50.6101
Citreimonas salinaria DSM_26880	Roseisalinus antarcticus CECT_7023	92.5625	0.965	65.96	83.0865	86.034	62.3829
Citreimonas salinaria DSM_26880	Roseobacter denitrificans OCh_114_DSM_7001	91.9137	0.8571	66.5	81.6486	85.5102	50.6868
Citreimonas salinaria DSM_26880	Roseobacter litoralis Och_149	91.7116	0.8467	66.6	81.8652	86.0128	48.4229
Citreimonas salinaria DSM_26880	Rubrimonas cliftonensis DSM_15345	87.3478	1.4895	58.97	75.6315	78.9957	59.3881
Citreimonas salinaria DSM_26880	Sagittula stellata E-37	91.8809	0.5249	70.28	85.0216	87.967	61.6261
Citreimonas salinaria DSM_26880	Salinihabitans flavidus DSM_27842	94.9118	0.7847	67.64	83.7037	86.7774	57.4184
Citreimonas salinaria DSM_26880	Sedimentitalea nanhaiensis DSM_24252	93.8263	0.7972	67.42	82.348	86.1425	55.3359
Citreimonas salinaria DSM_26880	Sediminimonas qiaohouensis DSM_21189	93.1711	0.8301	68.1	82.4217	85.9097	58.9107
Citreimonas salinaria DSM_26880	Shimia abyssi DSM_100673	91.0135	0.8272	66.3	81.468	85.8442	48.0784
Citreimonas salinaria DSM_26880	Shimia aestuarii DSM_15283	91.7568	0.7866	67.09	83.5113	86.8205	55.1711
Citreimonas salinaria DSM_26880	Shimia haliotis DSM_28453	92.0678	0.8349	66.01	82.1166	86.2516	50.9439
Citreimonas salinaria DSM_26880	Shimia isoporae SW6_1	93.0122	0.8372	65.9	81.4831	85.6429	47.749
Citreimonas salinaria DSM_26880	Shimia marina CECT_7688	91.9267	0.8522	66.17	81.8327	85.3694	49.0622
Citreimonas salinaria DSM_26880	Shimia sagamensis JAMH011_1	90.8046	0.8488	65.58	81.3634	85.6773	47.4738
Citreimonas salinaria DSM_26880	Silicimonas algicola DSM_103371	91.5768	1.0329	64.93	82.0594	85.4065	60.5212
Citreimonas salinaria DSM_26880	Tabrizicola aquatica RCRI19	90.6334	1.1775	63.83	79.6983	83.1233	58.8736
Citreimonas salinaria DSM_26880	Thalassobacter stenotrophicus CECT_5294	91.1231	1.006	65.06	80.2792	84.4696	48.7555
Citreimonas salinaria DSM_26880	Thalassococcus halodurans DSM_26915	93.568	0.5781	68.84	84.1087	87.5222	52.2176
Citreimonas salinaria DSM_26880	Thioclava arenosa CAU_1312	91.0135	1.1405	64.37	80.6912	83.9608	59.4628
Citreimonas salinaria DSM_26880	Thioclava atlantica 13D2W-2	91.6948	1.2096	63.59	81.2446	84.2877	60.1624
Citreimonas salinaria DSM_26880	Thioclava dalianensis strain_DLFJ1-1	91.363	1.2586	63.44	80.2636	83.8351	55.3927
Citreimonas salinaria DSM_26880	Thioclava electrotropha Elox9	91.6892	1.2352	63.49	80.7138	84.0705	59.1763
Citreimonas salinaria DSM_26880	Thioclava indica strain_DT23-4	90.303	1.2279	63.54	80.2272	84.3165	52.9672
Citreimonas salinaria DSM_26880	Thioclava marina 11-10-0-13	92.0946	1.215	63.8	81.5508	84.7979	59.2983
Citreimonas salinaria DSM_26880	Thioclava nitratireducens 25B10_4	91.1725	1.2289	63.79	80.9606	84.2703	58.8526
Citreimonas salinaria DSM_26880	Thioclava pacifica DSM_10166	91.5768	1.2081	63.87	81.1895	84.4602	58.8229
Citreimonas salinaria DSM_26880	Thioclava sediminum TAW-CT134	91.1725	1.231	63.41	80.597	83.9465	59.2364
Citreimonas salinaria DSM_26880	Tranquillimonas alkanivorans DSM_19547	92.4982	0.9651	67.22	83.6232	86.4558	64.2359
Citreimonas salinaria DSM_26880	Wenxinia marina DSM_24838	92.0892	0.9977	65.82	82.5294	85.1901	64.4203
Citreimonas salinaria DSM_26880	Wenxinia saemankumensis DSM_100565	92.0216	1.021	64.86	82.1625	84.4653	63.839
Citreimonas salinaria DSM_26880	Yoonia litorea DSM_29433	93.279	1.0134	65.71	81.0534	85.4047	48.6544
Citreimonas salinaria DSM_26880	Yoonia maricola DSM_29128	92.1356	0.9797	65.34	80.748	85.3333	47.2368
Citreimonas salinaria DSM_26880	Yoonia maritima DSM_101533	92.1981	0.9417	65.14	80.5888	85.234	43.1708
Citreimonas salinaria DSM_26880	Yoonia rosea DSM_29591	92.5373	0.9677	65.87	80.9076	84.9892	49.5384
Citreimonas salinaria DSM_26880	Yoonia sediminilitoris DSM_29955	92.731	0.9475	65.16	80.8465	85.1645	48.5702
Citreimonas salinaria DSM_26880	Yoonia tamlensis DSM_26879	91.8243	0.9596	65.24	80.6218	84.9516	47.7943
Citreimonas salinaria DSM_26880	Yoonia vestfoldensis DSM_16212	91.9703	1.0056	66.01	81.3798	84.9428	55.5538
Cognatishimia maritima DSM_28223	Acuticoccus yangtzensis JL1095	88.2632	2.1475	52.43	67.7643	73.7639	40.977
Cognatishimia maritima DSM_28223	Ahrensia kielensis DSM_5890	86.2184	2.1404	53.34	66.9265	74.6389	36.8133
Cognatishimia maritima DSM_28223	Ahrensia marina LZD062	86.1518	2.1332	53.83	67.0817	74.5492	37.6067
Cognatishimia maritima DSM_28223	Albimonas donghaensis DSM_17890	89.9865	1.2339	58.98	75.9246	80.6167	44.925
Cognatishimia maritima DSM_28223	Albimonas pacifica CGMCC_1.11030	89.7158	1.2299	58.95	75.6629	80.3749	44.718
Cognatishimia maritima DSM_28223	Aliiroseovarius crassostreae CV919-312	93.8596	0.7401	66.59	84.0983	88.511	49.9813
Cognatishimia maritima DSM_28223	Aliiroseovarius halocynthiae MA1_10_1	94.4482	0.7503	66.87	84.2043	88.7656	49.8776
Cognatishimia maritima DSM_28223	Aliiroseovarius pelagivivens CECT_8811	94.1216	0.7531	66.92	83.9871	88.6719	50.2937
Cognatishimia maritima DSM_28223	Aliiroseovarius sediminilitoris DSM_29439	93.5266	0.7789	66.58	83.2831	87.9464	48.964
Cognatishimia maritima DSM_28223	Amylibacter kogurei strain_4G11	92.0378	1.0575	62.41	77.0947	84.3375	43.5228
Cognatishimia maritima DSM_28223	Aquimixticola soesokkakensis CECT_8620	94.3128	0.7705	64.39	81.9172	86.7994	48.5525
Cognatishimia maritima DSM_28223	Ascidiaceihabitans donghaensis CECT_8599	95.1186	0.6282	67.92	83.1487	88.3869	48.2007
Cognatishimia maritima DSM_28223	Boseongicola aestuarii CECT_8489	92.9102	0.831	65.2	81.5172	86.6156	46.174
Cognatishimia maritima DSM_28223	Brevirhabdus pacifica 22DY15	93.555	0.8208	65.97	80.7041	85.108	47.6985
Cognatishimia maritima DSM_28223	Cereibacter changlensis DSM_18774	91.2661	0.8852	64.1	81.1764	85.4992	48.0604
Cognatishimia maritima DSM_28223	Cognatiyoonia koreensis DSM_17925	92.9682	0.7813	65.9	82.1248	87.0573	46.9562
Cognatishimia maritima DSM_28223	Cognatiyoonia sediminum DSM_28715	95.4422	0.832	66.36	81.671	87.0546	46.5693
Cognatishimia maritima DSM_28223	Cribrihabitans marinus DSM_29340	94.2974	0.6052	67.82	84.2322	88.2619	49.4493
Cognatishimia maritima DSM_28223	Dinoroseobacter shibae DFL_12	92.2139	0.794	65.93	82.3261	86.721	47.2599
Cognatishimia maritima DSM_28223	Flavimaricola marinus CECT_8899	92.1727	0.7273	65.56	81.9508	86.516	46.771
Cognatishimia maritima DSM_28223	Haematobacter massiliensis CCUG_47968	90.6943	0.9092	63.06	80.3252	84.8414	45.0462
Cognatishimia maritima DSM_28223	Haematobacter missouriensis H1892	91.0871	0.9082	62.92	80.0348	84.7144	44.7432
Cognatishimia maritima DSM_28223	Halocynthiibacter arcticus PAMC_20958	93.4095	0.8222	65.13	79.234	84.5716	44.1257
Cognatishimia maritima DSM_28223	Halocynthiibacter namhaensis RA2-3	93.0593	0.8006	65.98	81.6932	87.1729	46.6938
Cognatishimia maritima DSM_28223	Hasllibacter halocynthiae DSM_29318	92.3494	1.0941	62.29	77.3217	81.5078	43.3457
Cognatishimia maritima DSM_28223	Hwanghaeicola aestuarii DSM_22009	90.5286	0.9114	63.15	80.0007	84.5298	43.4735
Cognatishimia maritima DSM_28223	Jannaschia aquimarina GSW-M26	91.5541	0.9447	62.85	79.4651	84.0436	44.7551
Cognatishimia maritima DSM_28223	Jannaschia donghaensis CECT_7802	92.8281	1.0245	63.22	79.9989	84.9471	46.345
Cognatishimia maritima DSM_28223	Jannaschia faecimaris DSM_100420	92.4899	1.0064	63.46	80.0854	85.2339	45.7016
Cognatishimia maritima DSM_28223	Jannaschia helgolandensis DSM_14858	92.3649	0.9871	63.5	79.7552	84.919	46.1472
Cognatishimia maritima DSM_28223	Jannaschia pohangensis DSM_19073	93.1849	0.9407	63.6	80.8519	85.5997	47.2339
Cognatishimia maritima DSM_28223	Jannaschia rubra CECT_5088	92.4273	1.0063	63.04	80.0662	84.6812	45.7267
Cognatishimia maritima DSM_28223	Jannaschia seohaensis DSM_25227	92.2297	0.9225	63.15	80.4714	85.0747	46.3287
Cognatishimia maritima DSM_28223	Jhaorihella thermophila DSM_23413	91.446	0.6363	67.94	83.8949	88.1997	49.5278
Cognatishimia maritima DSM_28223	Kandeliimicrobium roseum XY-R6	90.5358	0.8389	64.94	81.8044	85.9666	47.4285
Cognatishimia maritima DSM_28223	Leisingera aquaemixtae CECT_8399	94.6586	0.7379	68.8	85.9701	89.9598	52.607
Cognatishimia maritima DSM_28223	Leisingera aquimarina DSM_24565	95.2671	0.7324	68.78	85.5748	89.7343	51.9548
Cognatishimia maritima DSM_28223	Leisingera caerulea DSM_24564	95.9946	0.7299	69.06	85.7097	89.824	52.2805
Cognatishimia maritima DSM_28223	Leisingera daeponensis DSM_23529	94.2606	0.7369	68.9	86.0819	90.0989	52.782
Cognatishimia maritima DSM_28223	Leisingera methylohalidivorans DSM_14336	94.6019	0.7514	68.79	85.8647	89.9889	52.1685
Cognatishimia maritima DSM_28223	Limimaricola cinnabarinus LL-001	92.5625	0.8906	64.34	75.8466	80.166	44.055
Cognatishimia maritima DSM_28223	Limimaricola hongkongensis DSM_17492	93.0264	0.841	64.88	81.1471	85.5468	47.6899
Cognatishimia maritima DSM_28223	Limimaricola pyoseonensis DSM_21424	92.1569	0.8195	64.26	81.5544	85.9107	47.8833
Cognatishimia maritima DSM_28223	Limimaricola soesokkakensis CECT_8367	92.833	0.8675	64.49	81.6137	86.0451	47.4913
Cognatishimia maritima DSM_28223	Litoreibacter albidus DSM_26922	92.6302	0.808	65.25	81.759	87.0364	48.2474
Cognatishimia maritima DSM_28223	Litoreibacter arenae DSM_19593	93.6615	0.7496	65.91	82.0232	86.9441	48.5088
Cognatishimia maritima DSM_28223	Litoreibacter ascidiaceicola DSM_100566	92.4273	0.7892	65.7	81.7406	86.9622	47.7579
Cognatishimia maritima DSM_28223	Litoreibacter halocynthiae MA1-10_1	93.4326	0.7926	66	81.673	86.8704	47.5847
Cognatishimia maritima DSM_28223	Litoreibacter janthinus DSM_26921	92.9682	0.7698	65.84	81.8185	87.0946	47.3353
Cognatishimia maritima DSM_28223	Litoreibacter meonggei DSM_29466	93.5854	0.7885	65.35	81.4875	86.7377	47.7991
Cognatishimia maritima DSM_28223	Litoreibacter ponti DSM_100977	93.1572	0.7325	65.58	82.6379	87.0547	48.5613
Cognatishimia maritima DSM_28223	Loktanella atrilutea DSM_29326	91.9486	0.8258	64.4	81.4978	85.7449	47.7836
Cognatishimia maritima DSM_28223	Loktanella fryxellensis DSM_16213	91.8243	0.8352	64.41	81.0626	85.186	47.9294
Cognatishimia maritima DSM_28223	Loktanella salsilacus DSM_16199	91.7623	0.8238	64.45	81.4203	86.1837	49.4591
Cognatishimia maritima DSM_28223	Marinibacterium profundimaris 22II1-22F33	94.8229	0.6626	66.67	82.9705	87.1736	49.3027
Cognatishimia maritima DSM_28223	Maritimibacter alkaliphilus HTCC2654	93.3784	0.7613	65.68	82.5068	86.9402	48.2976
Cognatishimia maritima DSM_28223	Monaibacterium marinum C7	92.0162	1.0638	61.02	78.378	83.5061	45.4116
Cognatishimia maritima DSM_28223	Neptunicoccus sediminis CY02	91.9865	0.9502	62.77	79.9131	85.3506	46.9537
Cognatishimia maritima DSM_28223	Nioella nitratireducens SSW136	93.3108	0.7984	65.45	82.3235	87.1127	49.2545
Cognatishimia maritima DSM_28223	Nioella sediminis JS7-11	93.8555	0.7715	65.62	82.2447	86.5343	48.8369
Cognatishimia maritima DSM_28223	Oceanicella actignis CGMCC_1.10808	88.6569	1.187	60.04	76.441	81.0463	45.4071
Cognatishimia maritima DSM_28223	Oceaniglobus indicus 1-19b	91.9757	0.8682	64.75	81.1007	85.7018	47.9814
Cognatishimia maritima DSM_28223	Oceaniovalibus guishaninsula JLT2003	91.9703	0.9502	64.57	78.6151	83.0209	45.6261
Cognatishimia maritima DSM_28223	Octadecabacter antarcticus 307	95.5254	0.8227	65.16	80.8538	86.2076	46.6137
Cognatishimia maritima DSM_28223	Octadecabacter arcticus 238	94.4669	0.8193	65.65	80.931	86.197	46.643
Cognatishimia maritima DSM_28223	Octadecabacter ascidiaceicola CECT_8868	94.9153	0.7804	65.98	82.0367	87.124	47.7096
Cognatishimia maritima DSM_28223	Octadecabacter temperatus SB1	94.8475	0.776	65.83	82	87.0545	47.7848
Cognatishimia maritima DSM_28223	Pacificibacter marinus DSM_25228	94.1216	0.8175	64.34	80.7505	87.1207	46.2839
Cognatishimia maritima DSM_28223	Pacificibacter maritimus DSM_104731	94.6622	0.8194	64.83	80.8157	87.2515	46.0028
Cognatishimia maritima DSM_28223	Paenirhodobacter enshiensis DW2-9	90.7382	1.087	62.42	79.757	84.4171	47.2804
Cognatishimia maritima DSM_28223	Palleronia abyssalis CECT_8504	92	0.9897	64.04	79.7591	84.4916	45.5589
Cognatishimia maritima DSM_28223	Palleronia marisminoris CECT_7066	91.4865	0.9871	63.05	80.0915	84.8492	46.3107
Cognatishimia maritima DSM_28223	Pararhodobacter aggregans D1-19	91.2838	0.949	62.05	79.8738	84.338	48.0202
Cognatishimia maritima DSM_28223	Pararhodobacter marinus CIC4N-9	92.0054	0.9341	62.66	79.8924	84.3097	47.6266
Cognatishimia maritima DSM_28223	Phaeobacter gallaeciensis DSM_26640	94.929	0.7492	69	85.5084	89.7566	50.7009
Cognatishimia maritima DSM_28223	Phaeobacter inhibens DSM_16374	94.6586	0.741	68.96	85.5466	89.8288	50.831
Cognatishimia maritima DSM_28223	Phaeobacter italicus CECT_7645	95.0508	0.7305	69.11	85.7771	89.8266	51.4032
Cognatishimia maritima DSM_28223	Phaeobacter porticola strain_P97	94.5307	0.7583	68.77	85.0714	89.5626	50.1307
Cognatishimia maritima DSM_28223	Planktotalea arctica IMCC9565	92.7517	0.6195	67.78	83.8973	88.8693	47.7424
Cognatishimia maritima DSM_28223	Planktotalea frisia SH6-1	93.2032	0.6307	68.15	83.3536	88.7727	46.8541
Cognatishimia maritima DSM_28223	Pontivivens insulae CeCT_8812	91.498	1.0295	61.42	78.819	83.9081	44.6722
Cognatishimia maritima DSM_28223	Pseudodonghicola xiamenensis DSM_18339	93.7719	0.6285	67.48	84.2705	88.5179	50.0312
Cognatishimia maritima DSM_28223	Pseudooctadecabacter jejudonensis CECT_8397	96.1277	0.7232	66.14	82.2059	87.1094	48.5108
Cognatishimia maritima DSM_28223	Pseudopelagicola gijangensis DSM_100564	95.4821	0.3954	71.25	86.2735	91.1652	50.1647
Cognatishimia maritima DSM_28223	Pseudophaeobacter arcticus DSM_23566	94.05	0.7609	68.34	84.7453	89.156	51.0701
Cognatishimia maritima DSM_28223	Pseudophaeobacter leonis 306	92.7076	0.7935	67.67	75.4975	79.2422	45.0893
Cognatishimia maritima DSM_28223	Pseudoroseicyclus aestuarii CECT_9025	91.6836	0.9082	63.22	79.4231	83.6237	46.7964
Cognatishimia maritima DSM_28223	Rhodobaca barguzinensis alga05	90.7432	0.9404	62.85	79.8243	85.1026	45.3909
Cognatishimia maritima DSM_28223	Rhodovulum imhoffii DSM_18064	90.5405	0.8117	65.91	81.1521	85.8047	46.1107
Cognatishimia maritima DSM_28223	Rhodovulum kholense DSM_19783	91.1367	0.8052	65.21	81.8793	86.0702	48.0847
Cognatishimia maritima DSM_28223	Rhodovulum robiginosum DSM_12329	90.7557	0.7817	65.75	81.6981	86.1013	48.216
Cognatishimia maritima DSM_28223	Rhodovulum sulfidophilum DSM_1374	91.5426	0.8299	65.34	82.0477	86.3717	47.8567
Cognatishimia maritima DSM_28223	Rhodovulum viride JA756	91.0074	0.8067	65.29	81.961	86.1745	48.2386
Cognatishimia maritima DSM_28223	Roseibaca calidilacus HL-91	90.7495	0.9585	63.11	79.5159	84.5951	47.3954
Cognatishimia maritima DSM_28223	Roseibaca ekhonensis CECT_7235	90.7495	0.9704	62.95	79.4386	84.7175	46.6209
Cognatishimia maritima DSM_28223	Roseibacterium elongatum DSM_19469	93.1711	0.8213	64.54	78.1006	82.4723	45.9981
Cognatishimia maritima DSM_28223	Roseicitreum antarcticum CGMCC_1.8894	92.1569	0.9098	63.55	79.5823	84.653	47.5231
Cognatishimia maritima DSM_28223	Roseicyclus mahoneyensis DSM_16097	92.7605	0.8382	64.31	80.9832	85.5665	47.5633
Cognatishimia maritima DSM_28223	Roseinatronobacter thiooxidans ALG1	90.7495	0.9413	63.22	79.8542	85.129	47.0205
Cognatishimia maritima DSM_28223	Roseisalinus antarcticus CECT_7023	93.0754	0.8006	65.04	81.7219	85.9927	47.318
Cognatishimia maritima DSM_28223	Roseobacter denitrificans OCh_114_DSM_7001	94.7867	0.6584	67.74	82.9534	87.752	47.8386
Cognatishimia maritima DSM_28223	Roseobacter litoralis Och_149	94.3128	0.648	67.8	83.2471	88.195	47.3414
Cognatishimia maritima DSM_28223	Rubrimonas cliftonensis DSM_15345	88.4381	1.3251	57.84	74.8889	79.5185	43.732
Cognatishimia maritima DSM_28223	Sedimentitalea nanhaiensis DSM_24252	94.2529	0.5984	68.05	83.8962	88.3657	49.2146
Cognatishimia maritima DSM_28223	Shimia abyssi DSM_100673	96.0625	0.427	70.62	86.2704	90.6835	49.593
Cognatishimia maritima DSM_28223	Shimia aestuarii DSM_15283	96.5377	0.3863	71.41	87.0812	91.0774	51.8863
Cognatishimia maritima DSM_28223	Shimia haliotis DSM_28453	94.7938	0.4347	70.71	86.7472	90.9161	52.3421
Cognatishimia maritima DSM_28223	Shimia isoporae SW6_1	95.4607	0.437	70.61	86.4008	90.8726	49.3341
Cognatishimia maritima DSM_28223	Shimia marina CECT_7688	95.9184	0.4519	71.01	86.1466	90.318	51.8953
Cognatishimia maritima DSM_28223	Shimia sagamensis JAMH011_1	95.3189	0.4486	70.29	86.1853	90.7723	51.6207
Cognatishimia maritima DSM_28223	Silicimonas algicola DSM_103371	92.37	0.8685	64.28	80.6965	85.342	45.3491
Cognatishimia maritima DSM_28223	Tabrizicola aquatica RCRI19	89.6622	1.0132	63.36	80.0128	84.7991	47.6113
Cognatishimia maritima DSM_28223	Thalassobacter stenotrophicus CECT_5294	94.0067	0.8417	65.8	81.6228	86.6615	46.9318
Cognatishimia maritima DSM_28223	Thioclava arenosa CAU_1312	91.3455	0.9761	64.75	81.2756	85.7117	49.2589
Cognatishimia maritima DSM_28223	Thioclava atlantica 13D2W-2	92.7605	1.0452	63.91	81.5515	85.8856	47.2333
Cognatishimia maritima DSM_28223	Thioclava dalianensis strain_DLFJ1-1	92.6302	1.0942	62.86	80.8358	85.4926	46.9341
Cognatishimia maritima DSM_28223	Thioclava electrotropha Elox9	92.2245	1.0708	63.41	81.3257	85.73	48.4741
Cognatishimia maritima DSM_28223	Thioclava indica strain_DT23-4	92.4324	1.0635	63.13	80.9155	85.7708	47.9596
Cognatishimia maritima DSM_28223	Thioclava marina 11-10-0-13	92.1569	1.0506	63.89	81.5181	85.89	47.782
Cognatishimia maritima DSM_28223	Thioclava nitratireducens 25B10_4	92.0999	1.0645	63.43	81.3962	85.8509	48.1733
Cognatishimia maritima DSM_28223	Thioclava pacifica DSM_10166	92.0324	1.0438	64	81.7827	86.1807	48.1138
Cognatishimia maritima DSM_28223	Thioclava sediminum TAW-CT134	92.0999	1.0666	63.53	81.1091	85.5128	48.361
Cognatishimia maritima DSM_28223	Tranquillimonas alkanivorans DSM_19547	90.5977	0.8007	65.63	81.852	86.3984	47.4488
Cognatishimia maritima DSM_28223	Wenxinia marina DSM_24838	91.7004	0.8333	64.14	80.7045	84.8175	46.343
Cognatishimia maritima DSM_28223	Wenxinia saemankumensis DSM_100565	92.1053	0.8567	63.8	80.7459	84.4914	46.2243
Cognatishimia maritima DSM_28223	Yoonia litorea DSM_29433	93.1664	0.849	66.38	82.2202	86.9947	46.9876
Cognatishimia maritima DSM_28223	Yoonia maricola DSM_29128	92.833	0.8154	66.03	82.2651	87.2781	47.5105
Cognatishimia maritima DSM_28223	Yoonia maritima DSM_101533	92.4949	0.7774	66.03	82.667	87.8115	47.1979
Cognatishimia maritima DSM_28223	Yoonia rosea DSM_29591	92.7654	0.8033	66.44	82.5749	87.3113	48.5305
Cognatishimia maritima DSM_28223	Yoonia sediminilitoris DSM_29955	92.7556	0.7831	66.22	82.3419	87.3873	47.5676
Cognatishimia maritima DSM_28223	Yoonia tamlensis DSM_26879	92.178	0.7952	66.27	82.6459	87.5774	49.0055
Cognatishimia maritima DSM_28223	Yoonia vestfoldensis DSM_16212	91.5711	0.8412	65.59	82.1987	86.6784	48.6834
Cognatiyoonia koreensis DSM_17925	Acuticoccus yangtzensis JL1095	87.762	2.236	52.65	67.3933	73.283	41.6352
Cognatiyoonia koreensis DSM_17925	Ahrensia kielensis DSM_5890	87.3005	2.2288	54.07	66.6534	74.4173	35.655
Cognatiyoonia koreensis DSM_17925	Ahrensia marina LZD062	86.8929	2.2217	54.51	66.8545	74.3176	37.3884
Cognatiyoonia koreensis DSM_17925	Albimonas donghaensis DSM_17890	88.4693	1.3224	59.08	75.3092	79.9495	45.0115
Cognatiyoonia koreensis DSM_17925	Albimonas pacifica CGMCC_1.11030	88.9641	1.3183	58.74	75.0263	79.8284	44.6497
Cognatiyoonia koreensis DSM_17925	Cereibacter changlensis DSM_18774	90.1961	0.9737	63.91	81.0043	85.2252	47.9723
Cognatiyoonia koreensis DSM_17925	Haematobacter massiliensis CCUG_47968	90.2003	0.9977	63.02	80.0848	84.5045	45.7949
Cognatiyoonia koreensis DSM_17925	Haematobacter missouriensis H1892	90.7557	0.9966	63.1	79.7556	84.2287	45.5579
Cognatiyoonia koreensis DSM_17925	Hwanghaeicola aestuarii DSM_22009	88.4249	0.9998	63.93	80.2954	84.5264	44.9169
Cognatiyoonia koreensis DSM_17925	Jannaschia aquimarina GSW-M26	91.4865	1.0331	63.43	79.591	83.8518	46.0684
Cognatiyoonia koreensis DSM_17925	Jannaschia donghaensis CECT_7802	92.4528	1.1129	64.31	80.3668	85.0886	47.7664
Cognatiyoonia koreensis DSM_17925	Jannaschia faecimaris DSM_100420	92.7224	1.0949	64.61	80.5921	85.3285	46.7953
Cognatiyoonia koreensis DSM_17925	Jannaschia helgolandensis DSM_14858	93.5135	1.0755	64.24	80.3229	84.9438	47.3796
Cognatiyoonia koreensis DSM_17925	Jannaschia pohangensis DSM_19073	93.8514	1.0292	64.41	81.1841	85.5105	48.3115
Cognatiyoonia koreensis DSM_17925	Jannaschia rubra CECT_5088	92.9777	1.0948	64.08	80.6269	84.8401	47.1992
Cognatiyoonia koreensis DSM_17925	Jannaschia seohaensis DSM_25227	91.8974	1.011	63.98	80.7674	85.1484	47.1241
Cognatiyoonia koreensis DSM_17925	Kandeliimicrobium roseum XY-R6	89.9721	0.9274	66	81.7346	85.7999	48.1078
Cognatiyoonia koreensis DSM_17925	Leisingera aquaemixtae CECT_8399	93.8137	0.937	65.79	82.3245	86.5352	48.8925
Cognatiyoonia koreensis DSM_17925	Leisingera aquimarina DSM_24565	92.6829	0.9316	65.77	82.016	86.4052	48.2808
Cognatiyoonia koreensis DSM_17925	Leisingera caerulea DSM_24564	92.5474	0.929	65.67	82.0778	86.463	48.5204
Cognatiyoonia koreensis DSM_17925	Leisingera daeponensis DSM_23529	93.6314	0.9361	65.8	82.4829	86.6846	49.1935
Cognatiyoonia koreensis DSM_17925	Leisingera methylohalidivorans DSM_14336	93.0988	0.9506	66.02	82.3185	86.6899	48.8175
Cognatiyoonia koreensis DSM_17925	Limimaricola cinnabarinus LL-001	94.7655	0.752	66.8	77.1359	81.1247	44.8663
Cognatiyoonia koreensis DSM_17925	Limimaricola hongkongensis DSM_17492	93.8817	0.7024	67.03	82.3521	86.4368	48.957
Cognatiyoonia koreensis DSM_17925	Limimaricola pyoseonensis DSM_21424	93.9497	0.6808	66.59	82.7461	86.7311	48.7056
Cognatiyoonia koreensis DSM_17925	Limimaricola soesokkakensis CECT_8367	94.0857	0.7289	66.75	82.9951	87.0341	48.5288
Cognatiyoonia koreensis DSM_17925	Litoreibacter ascidiaceicola DSM_100566	93.3828	0.8168	66.78	81.6527	86.6323	46.9365
Cognatiyoonia koreensis DSM_17925	Litoreibacter halocynthiae MA1-10_1	93.5179	0.8202	66.48	81.6108	86.6422	46.8056
Cognatiyoonia koreensis DSM_17925	Litoreibacter meonggei DSM_29466	94.9966	0.8161	66.26	81.6152	86.6016	46.4295
Cognatiyoonia koreensis DSM_17925	Loktanella atrilutea DSM_29326	93.8221	0.5149	70.22	85.0923	88.8277	50.6562
Cognatiyoonia koreensis DSM_17925	Loktanella salsilacus DSM_16199	94.1734	0.5129	70.01	85.1677	89.3203	50.4044
Cognatiyoonia koreensis DSM_17925	Monaibacterium marinum C7	90.7244	1.1522	61.59	77.5973	82.8694	44.5581
Cognatiyoonia koreensis DSM_17925	Oceanicella actignis CGMCC_1.10808	88.943	1.2755	60.08	75.8856	80.4332	45.7183
Cognatiyoonia koreensis DSM_17925	Oceaniglobus indicus 1-19b	92.4375	0.9566	65.53	81.3546	85.6467	48.9905
Cognatiyoonia koreensis DSM_17925	Oceaniovalibus guishaninsula JLT2003	91.7004	1.0387	64.96	78.9737	83.0937	47.4564
Cognatiyoonia koreensis DSM_17925	Paenirhodobacter enshiensis DW2-9	89.8399	1.1754	62.31	79.2038	83.7215	47.6363
Cognatiyoonia koreensis DSM_17925	Palleronia abyssalis CECT_8504	91.4807	1.0781	63.85	79.6656	84.277	46.3967
Cognatiyoonia koreensis DSM_17925	Palleronia marisminoris CECT_7066	91.4807	1.0755	63.4	80.4098	84.8356	47.1702
Cognatiyoonia koreensis DSM_17925	Pararhodobacter aggregans D1-19	90.1418	1.0375	62.14	79.5998	84.0637	47.4722
Cognatiyoonia koreensis DSM_17925	Pararhodobacter marinus CIC4N-9	90.4794	1.0226	62.34	79.4935	83.9816	47.8254
Cognatiyoonia koreensis DSM_17925	Phaeobacter gallaeciensis DSM_26640	93.8776	0.9484	66.28	81.9253	86.4919	46.9988
Cognatiyoonia koreensis DSM_17925	Phaeobacter inhibens DSM_16374	94.1497	0.9402	66.08	82.1371	86.6335	47.3708
Cognatiyoonia koreensis DSM_17925	Phaeobacter italicus CECT_7645	93.2699	0.9296	66.39	82.0828	86.5869	48.0713
Cognatiyoonia koreensis DSM_17925	Phaeobacter porticola strain_P97	93.0988	0.9575	66.5	81.718	86.4842	46.5776
Cognatiyoonia koreensis DSM_17925	Pontivivens insulae CeCT_8812	90.2703	1.118	61.67	78.4252	83.4051	44.7727
Cognatiyoonia koreensis DSM_17925	Pseudophaeobacter arcticus DSM_23566	93.8817	0.9601	65.61	81.8026	86.4908	46.9404
Cognatiyoonia koreensis DSM_17925	Pseudophaeobacter leonis 306	92.6252	0.9926	65.24	72.8608	76.8778	41.3881
Cognatiyoonia koreensis DSM_17925	Rhodobaca barguzinensis alga05	90.1351	1.0288	62.98	79.8936	84.6733	45.053
Cognatiyoonia koreensis DSM_17925	Rhodovulum kholense DSM_19783	89.8443	0.8937	65.12	81.1858	85.4382	48.5419
Cognatiyoonia koreensis DSM_17925	Rhodovulum sulfidophilum DSM_1374	90.4536	0.9184	65.23	81.3869	85.5683	48.1675
Cognatiyoonia koreensis DSM_17925	Rhodovulum viride JA756	89.9729	0.8951	65.22	81.2246	85.4141	48.5031
Cognatiyoonia koreensis DSM_17925	Roseibaca calidilacus HL-91	90.2093	1.0469	63	79.3693	84.3714	46.5533
Cognatiyoonia koreensis DSM_17925	Roseibaca ekhonensis CECT_7235	90.3444	1.0588	62.89	79.5283	84.4411	46.723
Cognatiyoonia koreensis DSM_17925	Roseicitreum antarcticum CGMCC_1.8894	90.8845	0.9983	63.8	79.5726	84.3567	46.9085
Cognatiyoonia koreensis DSM_17925	Roseinatronobacter thiooxidans ALG1	90.682	1.0297	63.19	79.7929	84.7606	46.2449
Cognatiyoonia koreensis DSM_17925	Rubrimonas cliftonensis DSM_15345	87.4239	1.4135	57.72	74.9473	79.492	44.1703
Cognatiyoonia koreensis DSM_17925	Tabrizicola aquatica RCRI19	90.2703	1.1016	63.51	79.8366	84.4971	47.5396
Cognatiyoonia koreensis DSM_17925	Thioclava arenosa CAU_1312	90.1828	1.0645	64.14	80.4417	84.9278	48.1013
Cognatiyoonia koreensis DSM_17925	Thioclava atlantica 13D2W-2	91.0074	1.1337	63.27	80.709	85.1847	47.3662
Cognatiyoonia koreensis DSM_17925	Thioclava dalianensis strain_DLFJ1-1	91.0135	1.1826	62.89	80.2522	84.7799	46.4065
Cognatiyoonia koreensis DSM_17925	Thioclava electrotropha Elox9	90.4601	1.1593	63.04	80.5612	85.1512	47.7716
Cognatiyoonia koreensis DSM_17925	Thioclava indica strain_DT23-4	90.762	1.152	63.13	80.1102	85.1644	46.7484
Cognatiyoonia koreensis DSM_17925	Thioclava marina 11-10-0-13	90.866	1.1391	63.23	80.6868	85.1604	47.5736
Cognatiyoonia koreensis DSM_17925	Thioclava nitratireducens 25B10_4	90.2834	1.153	62.93	80.6217	85.2032	47.6675
Cognatiyoonia koreensis DSM_17925	Thioclava pacifica DSM_10166	90.6883	1.1322	63.29	81.0762	85.5834	47.7446
Cognatiyoonia koreensis DSM_17925	Thioclava sediminum TAW-CT134	90.1484	1.155	62.98	80.3432	84.8925	47.6732
Cognatiyoonia koreensis DSM_17925	Tranquillimonas alkanivorans DSM_19547	90.2332	0.8892	66.12	81.6161	85.9874	47.8847
Cognatiyoonia koreensis DSM_17925	Yoonia litorea DSM_29433	95.664	0.4636	72.52	86.5403	90.678	49.5868
Cognatiyoonia koreensis DSM_17925	Yoonia maricola DSM_29128	97.0748	0.43	72.55	86.8773	91.1727	49.6874
Cognatiyoonia koreensis DSM_17925	Yoonia maritima DSM_101533	96.7369	0.392	72.1	86.4333	91.0045	47.9365
Cognatiyoonia koreensis DSM_17925	Yoonia rosea DSM_29591	96.329	0.4179	73.16	87.2367	91.1929	51.087
Cognatiyoonia koreensis DSM_17925	Yoonia sediminilitoris DSM_29955	96.1931	0.3977	72.81	87.1335	91.4331	50.285
Cognatiyoonia koreensis DSM_17925	Yoonia tamlensis DSM_26879	95.7966	0.4098	71.94	86.4754	90.7233	50.6438
Cognatiyoonia koreensis DSM_17925	Yoonia vestfoldensis DSM_16212	93.6401	0.4558	72.07	86.6973	90.5016	53.0177
Cognatiyoonia sediminum DSM_28715	Acuticoccus yangtzensis JL1095	87.7966	2.2868	52.58	66.6289	73.1153	39.1875
Cognatiyoonia sediminum DSM_28715	Ahrensia kielensis DSM_5890	86.3909	2.2796	54.07	66.2564	74.2151	35.9903
Cognatiyoonia sediminum DSM_28715	Ahrensia marina LZD062	86.2575	2.2725	54.75	66.2439	74.0101	36.6225
Cognatiyoonia sediminum DSM_28715	Albimonas donghaensis DSM_17890	89.0467	1.3732	59.26	74.1356	79.6336	42.6892
Cognatiyoonia sediminum DSM_28715	Albimonas pacifica CGMCC_1.11030	89.2422	1.3691	59	73.9129	79.393	42.3964
Cognatiyoonia sediminum DSM_28715	Cereibacter changlensis DSM_18774	89.6482	1.0244	63.94	79.5937	84.8917	45.5258
Cognatiyoonia sediminum DSM_28715	Haematobacter massiliensis CCUG_47968	89.3419	1.0484	62.66	78.9076	84.311	43.4997
Cognatiyoonia sediminum DSM_28715	Haematobacter missouriensis H1892	89.8111	1.0474	62.65	78.5797	84.0561	43.1278
Cognatiyoonia sediminum DSM_28715	Hwanghaeicola aestuarii DSM_22009	89.8019	1.0506	63.69	79.5193	84.6599	42.9463
Cognatiyoonia sediminum DSM_28715	Jannaschia aquimarina GSW-M26	92.0732	1.0839	63.37	78.9273	84.0612	43.6693
Cognatiyoonia sediminum DSM_28715	Jannaschia donghaensis CECT_7802	93.2157	1.1637	64.29	78.9178	84.263	44.3716
Cognatiyoonia sediminum DSM_28715	Jannaschia faecimaris DSM_100420	93.1479	1.1456	64.49	79.2042	84.6991	43.7818
Cognatiyoonia sediminum DSM_28715	Jannaschia helgolandensis DSM_14858	92.7507	1.1263	64.06	79.0564	84.4963	44.0724
Cognatiyoonia sediminum DSM_28715	Jannaschia pohangensis DSM_19073	93.3018	1.08	64.65	79.5924	84.7112	44.7968
Cognatiyoonia sediminum DSM_28715	Jannaschia rubra CECT_5088	92.8814	1.1455	63.83	78.8433	84.0623	43.7105
Cognatiyoonia sediminum DSM_28715	Jannaschia seohaensis DSM_25227	92.2764	1.0617	63.81	79.5033	84.6581	44.6997
Cognatiyoonia sediminum DSM_28715	Kandeliimicrobium roseum XY-R6	89.7079	0.9781	65.75	80.1396	85.0976	45.3448
Cognatiyoonia sediminum DSM_28715	Leisingera aquaemixtae CECT_8399	92.8378	0.9878	66.22	81.9464	87.1344	47.25
Cognatiyoonia sediminum DSM_28715	Leisingera aquimarina DSM_24565	93.6992	0.9824	66.18	81.6493	87.1361	47.1069
Cognatiyoonia sediminum DSM_28715	Leisingera caerulea DSM_24564	93.8263	0.9798	66.28	81.7195	87.0209	47.1532
Cognatiyoonia sediminum DSM_28715	Leisingera daeponensis DSM_23529	93.6401	0.9869	66.19	82.1338	87.2774	47.4951
Cognatiyoonia sediminum DSM_28715	Leisingera methylohalidivorans DSM_14336	93.1757	1.0014	66.42	81.3572	86.6631	47.0175
Cognatiyoonia sediminum DSM_28715	Limimaricola cinnabarinus LL-001	92.3649	0.8027	66.61	75.7203	80.5464	42.3443
Cognatiyoonia sediminum DSM_28715	Limimaricola hongkongensis DSM_17492	92.6928	0.7532	66.85	81.5194	86.5769	46.2523
Cognatiyoonia sediminum DSM_28715	Limimaricola pyoseonensis DSM_21424	92.3649	0.7316	66.29	81.7331	86.8373	45.6691
Cognatiyoonia sediminum DSM_28715	Limimaricola soesokkakensis CECT_8367	92.3649	0.7796	66.59	81.3406	86.3188	45.3747
Cognatiyoonia sediminum DSM_28715	Litoreibacter ascidiaceicola DSM_100566	92.7654	0.8676	66.41	80.463	86.1806	45.9037
Cognatiyoonia sediminum DSM_28715	Litoreibacter halocynthiae MA1-10_1	93.4326	0.8709	66.25	80.5133	86.2399	45.889
Cognatiyoonia sediminum DSM_28715	Litoreibacter meonggei DSM_29466	94.2451	0.8669	66.25	80.5121	86.2001	45.4699
Cognatiyoonia sediminum DSM_28715	Loktanella atrilutea DSM_29326	92.5676	0.5657	69.02	83.6191	88.3816	47.3526
Cognatiyoonia sediminum DSM_28715	Loktanella salsilacus DSM_16199	93.1664	0.5637	69.11	83.222	88.2241	48.0652
Cognatiyoonia sediminum DSM_28715	Monaibacterium marinum C7	91.2779	1.203	61.25	76.7733	82.6791	43.4169
Cognatiyoonia sediminum DSM_28715	Oceanicella actignis CGMCC_1.10808	89.1911	1.3263	59.92	75.2032	80.6761	42.6822
Cognatiyoonia sediminum DSM_28715	Oceaniglobus indicus 1-19b	91.3514	1.0074	65.09	80.5324	85.7389	45.559
Cognatiyoonia sediminum DSM_28715	Oceaniovalibus guishaninsula JLT2003	91.7456	1.0894	64.56	77.5791	82.6138	43.8931
Cognatiyoonia sediminum DSM_28715	Paenirhodobacter enshiensis DW2-9	89.2136	1.2262	61.99	77.9375	83.3999	44.8828
Cognatiyoonia sediminum DSM_28715	Palleronia abyssalis CECT_8504	91.8644	1.1289	64.05	79.0632	84.7117	44.2485
Cognatiyoonia sediminum DSM_28715	Palleronia marisminoris CECT_7066	91.4015	1.1263	63.75	79.359	84.851	44.4476
Cognatiyoonia sediminum DSM_28715	Pararhodobacter aggregans D1-19	89.8042	1.0882	62.12	77.9446	83.2945	45.104
Cognatiyoonia sediminum DSM_28715	Pararhodobacter marinus CIC4N-9	90.6993	1.0733	62.51	78.0471	83.442	45.1284
Cognatiyoonia sediminum DSM_28715	Phaeobacter gallaeciensis DSM_26640	93.4459	0.9991	66.23	81.246	86.5604	46.1832
Cognatiyoonia sediminum DSM_28715	Phaeobacter inhibens DSM_16374	93.4459	0.991	66.02	81.2251	86.5716	45.944
Cognatiyoonia sediminum DSM_28715	Phaeobacter italicus CECT_7645	92.9539	0.9804	66.46	81.5054	86.6757	46.4629
Cognatiyoonia sediminum DSM_28715	Phaeobacter porticola strain_P97	93.5047	1.0083	66.22	81.0402	86.4717	45.2427
Cognatiyoonia sediminum DSM_28715	Pontivivens insulae CeCT_8812	90.5954	1.1687	61.88	77.3888	83.0345	43.8061
Cognatiyoonia sediminum DSM_28715	Pseudophaeobacter arcticus DSM_23566	93.1081	1.0109	65.71	80.7805	86.3926	45.7109
Cognatiyoonia sediminum DSM_28715	Pseudophaeobacter leonis 306	92.6928	1.0434	65.5	72.4151	77.1412	40.5718
Cognatiyoonia sediminum DSM_28715	Rhodobaca barguzinensis alga05	90.0068	1.0796	63.17	78.6986	84.2724	43.2337
Cognatiyoonia sediminum DSM_28715	Rhodovulum kholense DSM_19783	89.527	0.9444	64.98	80.3372	85.5614	45.4346
Cognatiyoonia sediminum DSM_28715	Rhodovulum sulfidophilum DSM_1374	90	0.9691	65.07	80.0181	85.1544	45.196
Cognatiyoonia sediminum DSM_28715	Rhodovulum viride JA756	89.4595	0.9459	65.16	80.3106	85.5189	45.4562
Cognatiyoonia sediminum DSM_28715	Roseibaca calidilacus HL-91	90.0135	1.0977	63.31	78.4044	83.8703	43.7663
Cognatiyoonia sediminum DSM_28715	Roseibaca ekhonensis CECT_7235	90.081	1.1096	63.12	78.2979	83.8793	43.8324
Cognatiyoonia sediminum DSM_28715	Roseicitreum antarcticum CGMCC_1.8894	90.8845	1.049	63.58	78.3577	84.0119	44.5793
Cognatiyoonia sediminum DSM_28715	Roseinatronobacter thiooxidans ALG1	89.8111	1.0805	63.34	78.6458	84.2154	43.6609
Cognatiyoonia sediminum DSM_28715	Rubrimonas cliftonensis DSM_15345	87.1622	1.4643	57.61	73.5715	78.8282	41.9745
Cognatiyoonia sediminum DSM_28715	Tabrizicola aquatica RCRI19	88.6563	1.1524	63.53	78.3358	83.8422	45.5202
Cognatiyoonia sediminum DSM_28715	Thioclava arenosa CAU_1312	90.0676	1.1153	64.05	79.2714	84.65	45.7638
Cognatiyoonia sediminum DSM_28715	Thioclava atlantica 13D2W-2	90.8784	1.1844	63.45	79.3822	84.8388	44.8651
Cognatiyoonia sediminum DSM_28715	Thioclava dalianensis strain_DLFJ1-1	90.6144	1.2334	62.88	78.6802	84.2462	44.7141
Cognatiyoonia sediminum DSM_28715	Thioclava electrotropha Elox9	90.4054	1.21	63.34	79.1469	84.7168	45.7751
Cognatiyoonia sediminum DSM_28715	Thioclava indica strain_DT23-4	90.5469	1.2027	63.32	78.9733	84.7232	45.0705
Cognatiyoonia sediminum DSM_28715	Thioclava marina 11-10-0-13	90.5405	1.1898	63.54	79.8266	85.4236	45.4774
Cognatiyoonia sediminum DSM_28715	Thioclava nitratireducens 25B10_4	90.5954	1.2037	63.31	79.2278	84.7932	45.8193
Cognatiyoonia sediminum DSM_28715	Thioclava pacifica DSM_10166	90.9337	1.183	63.83	79.5471	85.1581	45.4831
Cognatiyoonia sediminum DSM_28715	Thioclava sediminum TAW-CT134	90.5954	1.2058	63.4	78.9181	84.4476	45.6742
Cognatiyoonia sediminum DSM_28715	Tranquillimonas alkanivorans DSM_19547	90.3132	0.9399	65.95	80.9526	86.2803	45.5377
Cognatiyoonia sediminum DSM_28715	Yoonia litorea DSM_29433	95.1897	0.5144	72.07	85.4651	90.3648	47.5653
Cognatiyoonia sediminum DSM_28715	Yoonia maricola DSM_29128	94.0541	0.4807	72.29	85.7567	90.542	48.4695
Cognatiyoonia sediminum DSM_28715	Yoonia maritima DSM_101533	93.8514	0.4427	71.22	84.5515	89.8183	47.0185
Cognatiyoonia sediminum DSM_28715	Yoonia rosea DSM_29591	93.8514	0.4687	72.14	85.2403	89.9082	48.6369
Cognatiyoonia sediminum DSM_28715	Yoonia sediminilitoris DSM_29955	93.9783	0.4485	71.72	85.0025	89.9939	47.2454
Cognatiyoonia sediminum DSM_28715	Yoonia tamlensis DSM_26879	93.3784	0.4606	70.94	84.7616	89.716	47.7532
Cognatiyoonia sediminum DSM_28715	Yoonia vestfoldensis DSM_16212	92.7703	0.5066	70.88	84.0899	88.802	48.1844
Cribrihabitans marinus DSM_29340	Acuticoccus yangtzensis JL1095	87.3048	2.1706	53.08	68.6455	73.5616	52.4458
Cribrihabitans marinus DSM_29340	Ahrensia kielensis DSM_5890	86.6267	2.1634	54.24	66.8583	73.9622	33.0135
Cribrihabitans marinus DSM_29340	Ahrensia marina LZD062	86.8929	2.1563	54.79	67.2178	73.8388	36.4449
Cribrihabitans marinus DSM_29340	Albimonas donghaensis DSM_17890	90.1828	1.257	59.79	77.1659	80.5351	59.7246
Cribrihabitans marinus DSM_29340	Albimonas pacifica CGMCC_1.11030	90.7182	1.2529	59.51	76.953	80.2229	59.8264
Cribrihabitans marinus DSM_29340	Aliiroseovarius halocynthiae MA1_10_1	92.0732	0.7733	66.5	83.1962	87.0153	51.3994
Cribrihabitans marinus DSM_29340	Aliiroseovarius pelagivivens CECT_8811	91.8188	0.7762	66.72	83.1891	86.9326	52.5757
Cribrihabitans marinus DSM_29340	Aliiroseovarius sediminilitoris DSM_29439	91.5598	0.802	67.49	83.3775	87.2995	53.5454
Cribrihabitans marinus DSM_29340	Amylibacter kogurei strain_4G11	90.9582	1.0806	62.25	76.0897	83.3736	39.0796
Cribrihabitans marinus DSM_29340	Boseongicola aestuarii CECT_8489	92.5726	0.8541	66.58	82.4557	86.6652	50.3121
Cribrihabitans marinus DSM_29340	Brevirhabdus pacifica 22DY15	92.8717	0.8439	67.52	82.472	85.4794	61.6436
Cribrihabitans marinus DSM_29340	Cereibacter changlensis DSM_18774	91.3161	0.9083	64.87	82.628	85.4297	62.7426
Cribrihabitans marinus DSM_29340	Cognatiyoonia koreensis DSM_17925	92.2764	0.8043	66.03	82.4512	86.508	48.9261
Cribrihabitans marinus DSM_29340	Cognatiyoonia sediminum DSM_28715	92.9444	0.8551	66.12	81.3657	86.2648	45.9056
Cribrihabitans marinus DSM_29340	Dinoroseobacter shibae DFL_12	91.3279	0.817	66.9	84.1345	87.1126	60.9553
Cribrihabitans marinus DSM_29340	Haematobacter massiliensis CCUG_47968	91.2482	0.9323	63.72	81.7356	85.0617	55.7316
Cribrihabitans marinus DSM_29340	Haematobacter missouriensis H1892	91.6103	0.9313	63.64	81.5381	84.8742	54.9686
Cribrihabitans marinus DSM_29340	Hasllibacter halocynthiae DSM_29318	90.9953	1.1172	63.44	79.4487	82.3902	58.1727
Cribrihabitans marinus DSM_29340	Hwanghaeicola aestuarii DSM_22009	91.4034	0.9345	64.16	82.1358	85.1939	56.9484
Cribrihabitans marinus DSM_29340	Jannaschia aquimarina GSW-M26	91.5541	0.9678	64.03	80.9819	84.4624	57.7813
Cribrihabitans marinus DSM_29340	Jannaschia donghaensis CECT_7802	92.3545	1.0475	64.34	80.7977	84.7877	56.6406
Cribrihabitans marinus DSM_29340	Jannaschia faecimaris DSM_100420	91.8809	1.0295	64.51	81.1453	85.2531	54.544
Cribrihabitans marinus DSM_29340	Jannaschia helgolandensis DSM_14858	91.6892	1.0101	64.92	81.1333	85.1033	55.5583
Cribrihabitans marinus DSM_29340	Jannaschia pohangensis DSM_19073	92.0946	0.9638	64.72	82.1117	85.5179	58.7948
Cribrihabitans marinus DSM_29340	Jannaschia rubra CECT_5088	92.1569	1.0294	64.6	81.8083	85.1379	59.3988
Cribrihabitans marinus DSM_29340	Jannaschia seohaensis DSM_25227	91.8919	0.9456	64.7	82.0182	85.2558	60.7509
Cribrihabitans marinus DSM_29340	Kandeliimicrobium roseum XY-R6	90.6685	0.862	66.81	83.4435	86.3199	62.8984
Cribrihabitans marinus DSM_29340	Leisingera aquaemixtae CECT_8399	94.7832	0.4961	71.94	87.4561	89.7684	63.7018
Cribrihabitans marinus DSM_29340	Leisingera aquimarina DSM_24565	94.1931	0.4907	71.61	86.6804	89.4479	60.0182
Cribrihabitans marinus DSM_29340	Leisingera caerulea DSM_24564	96.3946	0.4882	71.89	87.2315	89.7089	62.7337
Cribrihabitans marinus DSM_29340	Leisingera daeponensis DSM_23529	94.3919	0.4952	72.12	87.5849	89.9106	63.8124
Cribrihabitans marinus DSM_29340	Leisingera methylohalidivorans DSM_14336	93.9946	0.5097	72.09	87.1451	89.811	61.3338
Cribrihabitans marinus DSM_29340	Limimaricola cinnabarinus LL-001	92.4797	0.9137	65.55	77.33	80.3904	57.4095
Cribrihabitans marinus DSM_29340	Limimaricola hongkongensis DSM_17492	93.0217	0.8641	66.05	83.0658	85.938	63.4338
Cribrihabitans marinus DSM_29340	Limimaricola pyoseonensis DSM_21424	94.0379	0.8425	65.68	83.405	86.1101	64.9101
Cribrihabitans marinus DSM_29340	Limimaricola soesokkakensis CECT_8367	92.6152	0.8906	65.84	83.4403	86.4554	62.8789
Cribrihabitans marinus DSM_29340	Litoreibacter albidus DSM_26922	90.9398	0.8311	65.48	81.9307	86.5254	51.5894
Cribrihabitans marinus DSM_29340	Litoreibacter ascidiaceicola DSM_100566	91.1984	0.8123	66.03	82.0327	86.561	52.3201
Cribrihabitans marinus DSM_29340	Litoreibacter halocynthiae MA1-10_1	91.74	0.8157	66.22	82.1451	86.5835	51.8673
Cribrihabitans marinus DSM_29340	Litoreibacter janthinus DSM_26921	90.4922	0.7928	66.01	81.9817	86.5728	50.3355
Cribrihabitans marinus DSM_29340	Litoreibacter meonggei DSM_29466	92.2921	0.8116	66.04	81.8522	86.4393	51.706
Cribrihabitans marinus DSM_29340	Loktanella atrilutea DSM_29326	92.2817	0.8488	65.32	82.6937	85.8314	59.6768
Cribrihabitans marinus DSM_29340	Loktanella fryxellensis DSM_16213	91.5483	0.8583	65.26	82.4488	85.3648	59.7968
Cribrihabitans marinus DSM_29340	Loktanella salsilacus DSM_16199	91.4189	0.8469	65.1	82.3322	86.0442	52.9215
Cribrihabitans marinus DSM_29340	Marinibacterium profundimaris 22II1-22F33	93.5374	0.5356	70.23	86.6087	89.3097	64.6467
Cribrihabitans marinus DSM_29340	Monaibacterium marinum C7	93.2972	1.0869	61.99	78.933	83.2477	50.3173
Cribrihabitans marinus DSM_29340	Neptunicoccus sediminis CY02	91.3014	0.9733	63.2	80.0834	84.2921	48.5859
Cribrihabitans marinus DSM_29340	Nioella nitratireducens SSW136	93.2972	0.8215	66.99	83.837	87.2812	59.3646
Cribrihabitans marinus DSM_29340	Nioella sediminis JS7-11	92.6351	0.7946	66.83	83.1095	86.1481	58.6937
Cribrihabitans marinus DSM_29340	Oceanicella actignis CGMCC_1.10808	90.6815	1.2101	61.63	78.2201	81.495	60.9879
Cribrihabitans marinus DSM_29340	Oceaniglobus indicus 1-19b	91.6273	0.8912	66.01	82.7633	86.1869	59.4671
Cribrihabitans marinus DSM_29340	Oceaniovalibus guishaninsula JLT2003	93.2478	0.9733	65.92	80.7373	83.8211	59.8752
Cribrihabitans marinus DSM_29340	Octadecabacter antarcticus 307	92.7359	0.8458	65.83	80.7297	85.432	46.1429
Cribrihabitans marinus DSM_29340	Octadecabacter arcticus 238	91.9028	0.8424	66.21	80.6281	85.3094	46.8525
Cribrihabitans marinus DSM_29340	Octadecabacter ascidiaceicola CECT_8868	93.0754	0.8034	65.89	81.6225	85.9871	45.2283
Cribrihabitans marinus DSM_29340	Octadecabacter temperatus SB1	92.6001	0.799	65.8	81.4578	85.8894	44.4818
Cribrihabitans marinus DSM_29340	Pacificibacter marinus DSM_25228	92.0839	0.8406	64.02	79.5133	85.6755	41.6005
Cribrihabitans marinus DSM_29340	Pacificibacter maritimus DSM_104731	92.2192	0.8424	64.31	79.519	85.8181	41.1841
Cribrihabitans marinus DSM_29340	Paenirhodobacter enshiensis DW2-9	91.1375	1.11	62.28	80.987	84.2872	60.3764
Cribrihabitans marinus DSM_29340	Palleronia abyssalis CECT_8504	91.1186	1.0127	64.98	81.8687	85.4289	57.654
Cribrihabitans marinus DSM_29340	Palleronia marisminoris CECT_7066	90.9398	1.0101	64.37	81.8651	85.2651	60.2145
Cribrihabitans marinus DSM_29340	Pararhodobacter aggregans D1-19	90.9953	0.9721	63.19	81.0978	84.0015	61.4618
Cribrihabitans marinus DSM_29340	Pararhodobacter marinus CIC4N-9	91.5598	0.9572	63.49	81.1097	84.1227	60.4871
Cribrihabitans marinus DSM_29340	Phaeobacter gallaeciensis DSM_26640	94.7832	0.5075	72.18	86.6024	89.6353	55.6556
Cribrihabitans marinus DSM_29340	Phaeobacter inhibens DSM_16374	94.5122	0.4993	71.65	86.5618	89.52	55.6102
Cribrihabitans marinus DSM_29340	Phaeobacter italicus CECT_7645	93.9702	0.4888	71.95	87.3091	90.0475	56.2388
Cribrihabitans marinus DSM_29340	Phaeobacter porticola strain_P97	93.7922	0.5166	71.95	86.2172	89.4658	53.688
Cribrihabitans marinus DSM_29340	Pontivivens insulae CeCT_8812	92.235	1.0526	62.22	79.6025	83.5221	50.4986
Cribrihabitans marinus DSM_29340	Pseudodonghicola xiamenensis DSM_18339	95.8626	0.5015	71.37	87.0645	89.8751	62.1736
Cribrihabitans marinus DSM_29340	Pseudophaeobacter arcticus DSM_23566	93.0217	0.5192	71.13	86.1843	89.3246	55.3128
Cribrihabitans marinus DSM_29340	Pseudophaeobacter leonis 306	91.9028	0.5517	70.73	76.3173	79.0816	48.4712
Cribrihabitans marinus DSM_29340	Pseudoroseicyclus aestuarii CECT_9025	92.4797	0.9313	64.41	81.8896	84.3527	61.3605
Cribrihabitans marinus DSM_29340	Rhodobaca barguzinensis alga05	92.1462	0.9635	64.05	81.1619	85.2452	50.6409
Cribrihabitans marinus DSM_29340	Rhodovulum imhoffii DSM_18064	92.2245	0.8347	67.94	83.1485	86.3315	55.3978
Cribrihabitans marinus DSM_29340	Rhodovulum kholense DSM_19783	92.1462	0.8283	66.42	83.7155	86.475	63.0247
Cribrihabitans marinus DSM_29340	Rhodovulum robiginosum DSM_12329	92.37	0.8048	67.69	83.6891	86.5194	63.4228
Cribrihabitans marinus DSM_29340	Rhodovulum sulfidophilum DSM_1374	92.0785	0.853	66.7	83.8327	86.6046	63.3527
Cribrihabitans marinus DSM_29340	Rhodovulum viride JA756	92.0732	0.8297	66.55	83.6767	86.4115	63.1603
Cribrihabitans marinus DSM_29340	Roseibaca calidilacus HL-91	92.4222	0.9816	64.5	80.7034	84.7709	54.0728
Cribrihabitans marinus DSM_29340	Roseibaca ekhonensis CECT_7235	92.4222	0.9935	64.6	80.805	84.7539	54.0626
Cribrihabitans marinus DSM_29340	Roseibacterium elongatum DSM_19469	92.9102	0.8444	66.15	79.733	82.8819	58.804
Cribrihabitans marinus DSM_29340	Roseicitreum antarcticum CGMCC_1.8894	92.4899	0.9329	64.75	81.1348	84.9245	55.8703
Cribrihabitans marinus DSM_29340	Roseicyclus mahoneyensis DSM_16097	93.0847	0.8612	65.17	82.8617	86.1841	59.77
Cribrihabitans marinus DSM_29340	Roseinatronobacter thiooxidans ALG1	91.6779	0.9644	64.41	81.2144	85.2549	52.5277
Cribrihabitans marinus DSM_29340	Roseobacter denitrificans OCh_114_DSM_7001	92.6052	0.6369	69.4	84.4482	88.1096	52.6824
Cribrihabitans marinus DSM_29340	Roseobacter litoralis Och_149	92.5373	0.6265	68.87	84.4867	88.4741	50.6379
Cribrihabitans marinus DSM_29340	Rubrimonas cliftonensis DSM_15345	87.4154	1.3482	58.88	76.4858	79.8318	58.056
Cribrihabitans marinus DSM_29340	Sedimentitalea nanhaiensis DSM_24252	93.843	0.4714	72.67	87.1124	90.4488	59.7704
Cribrihabitans marinus DSM_29340	Shimia haliotis DSM_28453	93.4282	0.6592	68.31	84.4524	88.1197	52.5037
Cribrihabitans marinus DSM_29340	Shimia isoporae SW6_1	93.3784	0.6615	68.34	84.4945	88.2699	49.1389
Cribrihabitans marinus DSM_29340	Shimia marina CECT_7688	93.5506	0.6765	68.35	84.851	88.0597	50.9739
Cribrihabitans marinus DSM_29340	Shimia sagamensis JAMH011_1	93.3469	0.6731	67.66	84.0333	87.9858	49.1463
Cribrihabitans marinus DSM_29340	Silicimonas algicola DSM_103371	92.0216	0.8916	65.79	82.5341	85.8864	58.5345
Cribrihabitans marinus DSM_29340	Tabrizicola aquatica RCRI19	90.4536	1.0362	64.28	80.9471	84.3336	59.3042
Cribrihabitans marinus DSM_29340	Thalassobacter stenotrophicus CECT_5294	92.3906	0.8647	66.18	82.3188	86.549	49.1659
Cribrihabitans marinus DSM_29340	Thioclava arenosa CAU_1312	91.9377	0.9992	64.91	82.2635	85.2969	59.9111
Cribrihabitans marinus DSM_29340	Thioclava atlantica 13D2W-2	92.0216	1.0683	64.2	83.1356	86.1841	60.7897
Cribrihabitans marinus DSM_29340	Thioclava dalianensis strain_DLFJ1-1	91.8919	1.1172	64.03	82.2989	85.7562	56.9377
Cribrihabitans marinus DSM_29340	Thioclava electrotropha Elox9	91.9486	1.0939	64.01	82.3331	85.5248	58.8068
Cribrihabitans marinus DSM_29340	Thioclava indica strain_DT23-4	91.3455	1.0866	63.84	81.6607	85.6836	54.0744
Cribrihabitans marinus DSM_29340	Thioclava marina 11-10-0-13	92.3545	1.0737	64.1	82.593	85.5585	59.1073
Cribrihabitans marinus DSM_29340	Thioclava nitratireducens 25B10_4	91.5655	1.0876	63.96	82.458	85.6029	58.5516
Cribrihabitans marinus DSM_29340	Thioclava pacifica DSM_10166	91.8354	1.0668	64.33	82.7314	85.7707	58.8085
Cribrihabitans marinus DSM_29340	Thioclava sediminum TAW-CT134	91.4305	1.0897	63.89	82.097	85.2752	58.5567
Cribrihabitans marinus DSM_29340	Tranquillimonas alkanivorans DSM_19547	92.6224	0.8238	67.08	83.9709	86.8408	62.444
Cribrihabitans marinus DSM_29340	Wenxinia marina DSM_24838	92.1675	0.8563	65.58	83.0328	85.4227	62.2644
Cribrihabitans marinus DSM_29340	Wenxinia saemankumensis DSM_100565	91.3572	0.8797	65.14	83.0998	85.4557	62.5773
Cribrihabitans marinus DSM_29340	Yoonia litorea DSM_29433	92.7076	0.872	66.88	83.1213	86.826	49.7363
Cribrihabitans marinus DSM_29340	Yoonia maricola DSM_29128	92.2087	0.8384	66.3	82.364	86.6308	48.217
Cribrihabitans marinus DSM_29340	Yoonia maritima DSM_101533	91.5312	0.8004	65.86	82.5916	87.0083	43.5577
Cribrihabitans marinus DSM_29340	Yoonia rosea DSM_29591	92.2764	0.8264	66.86	82.9723	86.6508	50.6288
Cribrihabitans marinus DSM_29340	Yoonia sediminilitoris DSM_29955	92.0054	0.8062	66.18	82.8576	87.0004	50.4032
Cribrihabitans marinus DSM_29340	Yoonia tamlensis DSM_26879	91.2897	0.8183	66.04	82.7721	86.7995	49.1385
Cribrihabitans marinus DSM_29340	Yoonia vestfoldensis DSM_16212	91.7679	0.8643	66.63	83.0987	86.4362	57.0569
Dinoroseobacter shibae DFL_12	Acuticoccus yangtzensis JL1095	88.3705	2.0558	53.59	69.0044	73.9825	50.8454
Dinoroseobacter shibae DFL_12	Ahrensia kielensis DSM_5890	87.4834	2.0486	54	67.026	74.2032	32.2391
Dinoroseobacter shibae DFL_12	Ahrensia marina LZD062	87.3502	2.0415	54.4	67.3049	74.0817	35.3354
Dinoroseobacter shibae DFL_12	Albimonas donghaensis DSM_17890	90.2159	1.1422	60.43	77.569	81.1253	58.1785
Dinoroseobacter shibae DFL_12	Albimonas pacifica CGMCC_1.11030	91.0448	1.1381	59.92	77.4459	81.0145	58.3254
Dinoroseobacter shibae DFL_12	Aliiroseovarius halocynthiae MA1_10_1	93.4871	0.8058	65.76	82.3196	86.3875	49.2048
Dinoroseobacter shibae DFL_12	Aliiroseovarius pelagivivens CECT_8811	93.7712	0.8087	65.59	82.2861	86.3373	50.146
Dinoroseobacter shibae DFL_12	Amylibacter kogurei strain_4G11	91.0135	0.9657	62.29	76.6108	83.6329	38.3747
Dinoroseobacter shibae DFL_12	Boseongicola aestuarii CECT_8489	94.05	0.7704	66.18	82.6495	86.6529	49.3689
Dinoroseobacter shibae DFL_12	Cereibacter changlensis DSM_18774	91.5541	0.7935	65.2	82.7459	85.9573	60.4676
Dinoroseobacter shibae DFL_12	Cognatiyoonia koreensis DSM_17925	91.6046	0.8824	66.11	82.1455	86.1007	47.3038
Dinoroseobacter shibae DFL_12	Cognatiyoonia sediminum DSM_28715	91.3396	0.9332	65.72	80.7691	85.5746	44.9634
Dinoroseobacter shibae DFL_12	Haematobacter massiliensis CCUG_47968	92.6986	0.8175	63.67	81.857	85.2711	54.2286
Dinoroseobacter shibae DFL_12	Haematobacter missouriensis H1892	93.1128	0.8165	63.7	81.6507	85.1957	53.7587
Dinoroseobacter shibae DFL_12	Hasllibacter halocynthiae DSM_29318	94.1774	1.0335	63.7	79.5614	82.4832	56.7655
Dinoroseobacter shibae DFL_12	Hwanghaeicola aestuarii DSM_22009	91.0426	0.8508	64.49	82.0929	85.1005	55.7837
Dinoroseobacter shibae DFL_12	Jannaschia aquimarina GSW-M26	92.833	0.7156	65.11	81.4093	84.5335	56.332
Dinoroseobacter shibae DFL_12	Jannaschia donghaensis CECT_7802	92.4426	0.7953	65.03	81.4104	85.0733	55.4028
Dinoroseobacter shibae DFL_12	Jannaschia faecimaris DSM_100420	92.4426	0.7773	65.41	81.678	85.6465	53.44
Dinoroseobacter shibae DFL_12	Jannaschia helgolandensis DSM_14858	92.7654	0.7579	65.23	81.6895	85.3608	53.9755
Dinoroseobacter shibae DFL_12	Jannaschia pohangensis DSM_19073	92.6302	0.7116	65.69	82.5427	85.8588	57.1693
Dinoroseobacter shibae DFL_12	Jannaschia rubra CECT_5088	92.235	0.7772	65.16	82.236	85.3104	57.5163
Dinoroseobacter shibae DFL_12	Jannaschia seohaensis DSM_25227	92.7605	0.6934	65.68	82.514	85.6742	59.1341
Dinoroseobacter shibae DFL_12	Kandeliimicrobium roseum XY-R6	92.0139	0.7783	66.88	83.4199	86.4776	60.8346
Dinoroseobacter shibae DFL_12	Leisingera aquaemixtae CECT_8399	92.1409	0.9497	66.06	83.3782	86.5521	58.4802
Dinoroseobacter shibae DFL_12	Leisingera aquimarina DSM_24565	92.4949	0.9443	65.87	82.8379	86.3049	55.6095
Dinoroseobacter shibae DFL_12	Leisingera caerulea DSM_24564	91.9377	0.9417	66.14	83.0878	86.4068	57.4852
Dinoroseobacter shibae DFL_12	Leisingera daeponensis DSM_23529	90.9521	0.9488	66.02	83.4928	86.6225	58.5824
Dinoroseobacter shibae DFL_12	Leisingera methylohalidivorans DSM_14336	92.2454	0.9633	65.73	83.1733	86.5244	56.2399
Dinoroseobacter shibae DFL_12	Limimaricola cinnabarinus LL-001	91.3957	0.9917	65.38	76.8224	79.8388	54.6302
Dinoroseobacter shibae DFL_12	Limimaricola hongkongensis DSM_17492	91.791	0.9422	65.57	82.1391	85.1079	60.1919
Dinoroseobacter shibae DFL_12	Limimaricola pyoseonensis DSM_21424	91.5312	0.9206	65.53	82.6216	85.3986	61.6555
Dinoroseobacter shibae DFL_12	Limimaricola soesokkakensis CECT_8367	91.7344	0.9686	65.89	82.7026	85.6975	59.4775
Dinoroseobacter shibae DFL_12	Litoreibacter albidus DSM_26922	92.7027	0.9092	65.97	82.2282	86.8838	50.5998
Dinoroseobacter shibae DFL_12	Litoreibacter ascidiaceicola DSM_100566	92.6351	0.8903	66.51	82.45	86.9748	51.6419
Dinoroseobacter shibae DFL_12	Litoreibacter halocynthiae MA1-10_1	92.7605	0.8937	66.52	82.4901	86.9485	51.308
Dinoroseobacter shibae DFL_12	Litoreibacter janthinus DSM_26921	93.2478	0.8709	66.45	82.3737	87.0328	49.3894
Dinoroseobacter shibae DFL_12	Litoreibacter meonggei DSM_29466	93.3018	0.8897	66.26	82.2275	86.8895	51.2237
Dinoroseobacter shibae DFL_12	Loktanella atrilutea DSM_29326	91.74	0.9269	64.76	81.8438	85.0759	57.3035
Dinoroseobacter shibae DFL_12	Loktanella fryxellensis DSM_16213	92.0892	0.9363	64.73	81.6361	84.8468	57.2031
Dinoroseobacter shibae DFL_12	Loktanella salsilacus DSM_16199	91.2221	0.925	64.8	81.4574	85.3012	51.0989
Dinoroseobacter shibae DFL_12	Monaibacterium marinum C7	90.9892	0.9721	62.7	79.2785	83.7805	49.087
Dinoroseobacter shibae DFL_12	Neptunicoccus sediminis CY02	90.9091	0.8585	63.58	80.3104	84.6788	47.3612
Dinoroseobacter shibae DFL_12	Nioella nitratireducens SSW136	93.6314	0.6395	66.55	83.6416	87.2176	56.9293
Dinoroseobacter shibae DFL_12	Nioella sediminis JS7-11	93.6444	0.6126	66.98	83.0785	86.27	57.2009
Dinoroseobacter shibae DFL_12	Oceanicella actignis CGMCC_1.10808	90.5358	1.0953	61.64	78.4031	81.7849	58.1737
Dinoroseobacter shibae DFL_12	Oceaniglobus indicus 1-19b	90.9091	0.8075	66.03	82.6641	86.0271	57.0878
Dinoroseobacter shibae DFL_12	Oceaniovalibus guishaninsula JLT2003	92.2297	0.8896	65.88	80.5209	83.7513	56.6806
Dinoroseobacter shibae DFL_12	Octadecabacter antarcticus 307	92.5625	0.9239	65.24	79.9245	84.7049	45.2116
Dinoroseobacter shibae DFL_12	Octadecabacter arcticus 238	92.5826	0.9205	65.5	79.8646	84.7748	46.0054
Dinoroseobacter shibae DFL_12	Octadecabacter ascidiaceicola CECT_8868	92.6978	0.8815	65.4	80.7548	85.3611	44.7187
Dinoroseobacter shibae DFL_12	Octadecabacter temperatus SB1	92.4949	0.8771	64.91	80.4878	85.1727	43.5564
Dinoroseobacter shibae DFL_12	Paenirhodobacter enshiensis DW2-9	91.5738	0.9952	62.88	80.5936	84.1685	57.7862
Dinoroseobacter shibae DFL_12	Palleronia abyssalis CECT_8504	92.2087	0.929	64.67	81.6442	85.261	55.9837
Dinoroseobacter shibae DFL_12	Palleronia marisminoris CECT_7066	91.3455	0.9264	63.94	81.7491	85.1304	58.3651
Dinoroseobacter shibae DFL_12	Pararhodobacter aggregans D1-19	92.5676	0.8573	63.37	81.0139	84.3442	58.8503
Dinoroseobacter shibae DFL_12	Pararhodobacter marinus CIC4N-9	92.0216	0.8424	63.55	81.0941	84.4072	57.8391
Dinoroseobacter shibae DFL_12	Phaeobacter gallaeciensis DSM_26640	91.74	0.9611	66.17	82.6213	86.5106	52.1876
Dinoroseobacter shibae DFL_12	Phaeobacter inhibens DSM_16374	91.74	0.9529	66.06	82.6586	86.4622	52.1608
Dinoroseobacter shibae DFL_12	Phaeobacter italicus CECT_7645	92.4695	0.9423	66.1	83.2185	86.8341	52.3352
Dinoroseobacter shibae DFL_12	Phaeobacter porticola strain_P97	91.5037	0.9702	66.25	82.2163	86.2926	50.4113
Dinoroseobacter shibae DFL_12	Pontivivens insulae CeCT_8812	90.8845	0.9378	62.95	80.0886	84.1036	50.2081
Dinoroseobacter shibae DFL_12	Pseudophaeobacter arcticus DSM_23566	91.1247	0.9728	65.07	82.5002	86.3555	51.1692
Dinoroseobacter shibae DFL_12	Pseudophaeobacter leonis 306	89.8854	1.0053	65.04	73.2266	76.5364	44.9083
Dinoroseobacter shibae DFL_12	Pseudoroseicyclus aestuarii CECT_9025	91.8022	1.0093	64.34	80.7626	83.573	58.8103
Dinoroseobacter shibae DFL_12	Rhodobaca barguzinensis alga05	91.3514	0.8487	64.22	81.4671	85.5999	49.2314
Dinoroseobacter shibae DFL_12	Rhodovulum kholense DSM_19783	91.5989	0.7446	66.24	83.2927	86.465	60.2496
Dinoroseobacter shibae DFL_12	Rhodovulum robiginosum DSM_12329	92.6351	0.7211	67.5	83.1853	86.513	60.0677
Dinoroseobacter shibae DFL_12	Rhodovulum sulfidophilum DSM_1374	92.0732	0.7693	66.34	83.5047	86.659	60.2277
Dinoroseobacter shibae DFL_12	Rhodovulum viride JA756	91.5989	0.746	66.44	83.2434	86.4021	60.2728
Dinoroseobacter shibae DFL_12	Roseibaca calidilacus HL-91	91.6273	0.8668	64.82	81.0033	85.2114	52.4052
Dinoroseobacter shibae DFL_12	Roseibaca ekhonensis CECT_7235	91.3572	0.8786	64.69	80.9891	85.2183	52.4355
Dinoroseobacter shibae DFL_12	Roseibacterium elongatum DSM_19469	95.1318	0.6624	67.13	80.2333	83.4517	56.2682
Dinoroseobacter shibae DFL_12	Roseicitreum antarcticum CGMCC_1.8894	91.0196	0.8181	64.94	81.6683	85.4876	54.1858
Dinoroseobacter shibae DFL_12	Roseicyclus mahoneyensis DSM_16097	92.9054	0.6792	66.54	83.2501	86.5528	57.6177
Dinoroseobacter shibae DFL_12	Roseinatronobacter thiooxidans ALG1	91.0871	0.8496	64.68	81.4168	85.6098	50.8023
Dinoroseobacter shibae DFL_12	Rubrimonas cliftonensis DSM_15345	88.5501	1.2334	59.14	76.8442	80.4662	56.35
Dinoroseobacter shibae DFL_12	Shimia haliotis DSM_28453	92.6202	0.848	65.03	81.9559	86.0961	49.8584
Dinoroseobacter shibae DFL_12	Shimia isoporae SW6_1	92.9682	0.8503	65.23	82.11	86.4451	47.0234
Dinoroseobacter shibae DFL_12	Shimia marina CECT_7688	92.8233	0.8653	65.66	82.3453	86.2189	48.9596
Dinoroseobacter shibae DFL_12	Shimia sagamensis JAMH011_1	92.9006	0.8619	65.12	81.8104	86.1807	46.9319
[truncated: 10,223 more rows]
