# Supplementary material for: Roseobacters in a Sea of Poly- and Paraphyly: Whole Genome-Based Taxonomy of the Family Rhodobacteraceae and the Proposal for the Split of the “Roseobacter Clade” Into a Novel Family, Roseobacteraceae fam. nov
Source: Front Microbiol. 2021 Jun 25;12:683109. doi: 10.3389/fmicb.2021.683109 (PMC8267831; doi:10.3389/fmicb.2021.683109)
Supplement: Supplementary file 6 [file Table_5.xlsx]

## Sheet: Sp_Rhodovulum
Supplementary Table 5. Phenotypic data for organisms involved in species-level reclassifications (Sp_), as well as para- (Para_) and polyphyletic (Poly_) genera together with their closest neighbors. Number in parentheses indicate the number of isolates. ND, not determined.
	Rhodovulum kholense	Rhodovulum viride
cell size (µm)	1x2-3	0.3-0.8x1-2.5
NaCl range (optimum)	1-8 (2)	0.5-10 (1-5)
pH range (optimum)	6-8.5 (6.5-7.5)	7.5-10 (8.5)
dark aerobic growth	+	+
temperature range (optimum)	25-35 (25-30)	20-35 (25-30)
color of cell suspension	yellowish-brown	yellowish-brown
vitamin requirement	thiamine, biotin, p-aminobenzoic acid	thiamine, biotin, niacin
carbon utilization
propionate	-	+
valerate	-	+
ethanol	-	-
lactate	-	-
fumarate	-	+
malate	+	+
citrate	-	+
aspartate	-	+
glutamate	+	+
glucose	+	+
glycerol	-	+
mannitol	+	+
pyruvate	+	-
major carotenoids	spheroidene	spheroidene
fatty acids	10:0 3-OH; 16:0; 16:1 ω7c; 16:1 ω6c; 18:0; 18:1 ω5c; 18:1 ω7c; 18:1 ω6c; 11-methyl 18:1 ω7c	10:0 3-OH; 14:0 3-OH; iso-16:1; 16:0; 16:1 ω7c; 16:1 ω6c; 10-methyl 17:0; 18:1 ω7c; 18:1 ω7c
G+C content (%)	67.8	67.6

## Sheet: Sp_Rhodobaca
	Rhodobaca borgoriensis	Rhodobaca barguzinensis
habitat	Soda Lake Borgoria, African Rift Zone	Steppe soda lake, Siberia (sharply continental climate)
shape	cocci, short rods	short rods
size (µm)	0.8-1.0x1.0-1.5	1.0x1.5
division type	constriction	nonuniform division by constriction, resembles budding
motility	+	+
reaction to O2	faculative aerobe	faculative aerobe
carotenoids in vivo	450,485,525	475,507,590
BChl a in vivo	870	870
NaCl requirement	-	+
NaCl range (optimum)	0-6 (1-1.5)	1-8 (2-3)
pH range (optimum)	7-10 (9)	7.5-9 (8.2)
temperature range (°C)	39	25-35
catalase	+	+
nifH gene presence	-	-
presence of ribulose biophosphate carboxylase	-	-
photoheterotrophic utilization of sulfide	+	+
resistance to sulfide	+	+
fatty acids	12:0; 14:1; 14:0; 14:0 2-OH; iso-15:0; anteiso-15:0; 16:1 ω7c; 16:0; 15:0 2-OH; 18:1 ω9c; 18:1 ω7c; 11-methyl 18:1	14:1; 16:1 ω7c; 16:0; 18:1 ω7c; 18:0; 11-methyl 18:1
antibiotic resistance
ampicillin	+	+
benzylpenicilliin	+	+
vancomycin	+	+
gentamycin	+	-
kanamycin	+	-
lincomycin	+	+
nalidixic acid	+	-
neomycin	+	+
novobiocin	+	+
polymyxin	+	+
rifampicin	+	+
streptomycin	+	+
tetracycline	+	+
erythromycin	+	+
nitrogen source utilization
NH4Cl	+	+
urea	+	+
serine	+	+
glycine	+	ND
aspartate	+	ND
glutamate	+	+
NaNO3	-	-
carbon utilization (anaerobic conditions)
succinate	+	+
malate	+	+
fumarate	+	+
pyruvate	+	+
lactate	+	+
acetate	+	+
propionate	+	+
butyrate	+	+
valerate	+	+
caproate	+	+
heptanoic acid	+	ND
glucose	+	ND
fructose	+	+
sucrose	+	+
ribose	+	+
xylose	+	ND
mannitol	+	+
yeast extract	+	+
peptone	+	+
casein hydrolysate	+	+
soeton	+	+
methanol	-	-
ethanol	-	-
propanol	-	-
butanol	-	-
pentanol	-	ND
lactose	-	+
citrate	-	-
formate	-	-
benzoate	-	-
carbon utilization (aerobic conditions)
succinate	+	+
malate	+	+
fumarate	+	+
pyruvate	+	+
lactate	+	+
acetate	+	+
propionate	+	+
butyrate	+	+
valerate	+	+
caproate	-	+
heptanoic acid	ND	ND
glucose	ND	ND
fructose	+	+
sucrose	+	+
ribose	+	+
xylose	+	+
mannitol	+	+
yeast extract	+	+
peptone	+	+
casein hydrolysate	+	+
soeton	+	+
methanol	-	-
ethanol	-	-
propanol	-	-
butanol	-	-
pentanol	ND	ND
lactose	-	+
citrate	-	-
formate	-	-
benzoate	-	-
G+C content (%)	59.04	59

## Sheet: Para_Actibacterium
	Actibacterium (4)	Confluentimicrobium lipolyticum
oxygen requirement	aerobic	aerobic
trophism	chemoorganotrhop (1)	ND
oxidase	+	+
catalase	+ (3), w (1)	+
PHB (polyhydroxybutyrate)	- (2)	ND
polar lipids	phosphatidylglycerol phosphatidylcholine	phosphatidylglycerol sulfoquinovosyldiacylglycerol
fatty acids	18:1 ⍵7c; 18:1 ⍵6c; 10:0 3-OH; 12:0 3-OH; 12:0; 18:0; 18:1 ⍵7c 11-methyl; 19:0 3-OH; 18:0; 19:0 cyclo ⍵8c; 16:1 ⍵7c; 16:1 ⍵6c; 16:0	18:1 ⍵7c; cyclo 19:0 ⍵8c
ubiquinone	Q-10	Q-10
G+C content (%)	57.8-64.3	57.7
temperature range	10-41	10-35
Na+ requirement	+ (2)	+
NaCl range	0.5-9	0.5-6
nitrate reduction	- (2), + (2)	-

## Sheet: Para_Epibacterium
	Epibacterium (4)	Tritonibacter horizontis	Tritonibacter (3)
aerobic	aerobic/chemo-organotrophic	aerobic/chemo-organoheterotroph	aerobic
oxidase	+	+	+
catalase	+	+	+
shape	rod/ovoid rod	rod	rod
Na+ requirement	+ (2), - (1)	+	- (1), + (2)
NaCl range	0-15	0.5-10	0-15
pH range	5-11	5.5-9	5-11
temperature (°C)	4-40	4-45	4-40
fatty acids	18:1⍵7c; 16:0; 18:2; 10:0 3-OH; 12:0; 20:1 2-OH; 16:0 2-OH; 12:0 3-OH; 18:0; 11-methyl 18:1 ⍵7c; 18:1 2-OH; 18:1 ⍵7c; 18:1 ⍵6c	10:0 3-OH; 12:1; 12:1 3-OH; 14:1 3-OH; 3-oxo-14:0; 16:0; 16:0 2-OH; 18:1 2-OH	C10:0 3-OH; 11-methyl C18:1 ⍵7c; C16:0; C16:0 2-OH; C18:1 2-OH ⍵7c; 18:1 ⍵7c; 16:0; 18:2; 10:0 3-OH; 12:0; 20:1 2-OH; 18:0; C18:1 ⍵7c; 18:1 ⍵6c; C10: 3-OH
polar lipid	phosphatidylgycerol phosphatidylcholine phosphatidylethanolamine	phosphatidylcholine phosphatidylglycerol	phophatidylglycerol phosphatidycholine phosphatidylethanolamine phosphatidylglycerol phosphatidylcholine
respiratory quinone	Q-10	Q-10	Q-10
G+C content (%)	53-60.9	61.5	52.6-61

## Sheet: Para_Paracoccus
	Paracoccus (27)	Methylarcula marina
shape	dipococcoid, coccobacillary, coccoid, rod, short rod, irregular elliptical	rod
spore formation	- (17)	-
motility	- (21), + (4)	-
pH	5-13	5-10.5
temperature (°C)	4-60	10-42
growth @ 30	+ (25)	+
growth @ 37	+ (21), - (3)	+
NaCl (%)	0-15	0.05-12
NaCl @ 5	+ (13), - (4)	+
ubiquinone	Q-10 (19)	Q-10
fatty acids	18:1 ⍵7c; 18:0; 10:0 3-OH; 17:0; 16:0; 14:0 3-OH; 16:1 iso; 18:1; 18:1 ⍵6c; 19:0 cyclo; 14:0 iso; 15:0; 16:1 ⍵7c; 15:0 iso 2-OH; 19:0 10-methyl; 19:0 ⍵8c cyclo; 17:1 anteiso A; 12:1 ⍵7c; 18:2; 18:1 ⍵9c; 18:1 ⍵7c 11-methyl; 14:0; 15:1 iso; 17:1 ⍵8c; 19:0 cyc; 15:0 anteiso; 17:0 anteiso; 15:0 iso; 18:1 ⍵9t; 18:1 ⍵12t	18:1; 18:0; 19:0 cyclo
G+C content (%)	61.1-70.7	63
nitrate reduction	- (11), + (12)	-
Na+ requirement	- (9), + (3)	+
oxidase	+ (23)	+
catalase	+ (22)	+

## Sheet: Para_Roseovarius
	Roseovarius (18)	Pelagivirga sediminicola	Pelagivirga dicentrarchi	Pelagicola litorisediminis
shape	Ovoid/Rod	Oval/Rod	Rod	Ovoid/rod
motility	v (1), + (7), - (9)	-	-	-
poly-beta-hydroxybutyrate	v (1), - (1), + (2)	ND	ND	ND
spores	- (10)	ND	-	-
bacteriochlorophyll a	v (1), - (9), + (3)	ND	+	ND
temperature (°C)	0-45	15-40	4-37	4-40
Na requirements	+	+	-	ND
NaCl range (%)	<1 - 20	1-10	0-11	1-7
pH	4-10	6-8.5	6-9	5-8
aerobic	strict aerobic obligate aerobic aerobic	strict aerobic	strict aerobic	aerobic
catalase	- (1), w (1), + (16)	+	+	+
cytochrome oxidase	v (1), + (15), w (2)	+	+	+
polar lipds	diphosphatidylglycerol phosphatidylglycerol phosphatidylcholine phosphatidylethanolamine diphatidylglycerol phosphatidylethanoamine diphoshpatidylglycerol phsophatidyglycerol phosphatidycholine	phosphatidylglycerol phosphatidylethanolamine	diphosphatidylglycerol phosphatidylglycerol phosphatidycholine	phosphatidylcholine phosphatidylglycerol phosphatidylethanolamine
fatty acids	C18:1; C18:2; C12:0 2-OH; C12:1 3-OH; C16:1; C16:0; C18:0; C18:1 ⍵7C; C18:1 ⍵7C 11-methyl; C10:0 3-OH; C16:0 2-OH; C10:0; C12:0; C17:0; C18:0 iso; C18:0 ⍵8C cyclo; C18:1 ⍵6C; C18:1 ⍵7c; C18:1 ⍵6c; 16:1 ⍵9c; C18:0 methyl; C18:1 ⍵7 methyl; C19:1 cyclo; C19:0 ⍵8c; C18:1 ⍵7c 11-methyl; C18:1 ⍵9t; C18:1 ⍵12t	C19:0 ⍵8c cyclo; C16:0; C18:1 ⍵7c; C18:1 ⍵6c	C18:1 ⍵7c; C18:1 ⍵6c; cyclo-C19:0 ⍵8c; 11-methyl-C18:1 ⍵7c	C18:1 ⍵7c; C18:1 ⍵7c 11-methyl; C16:0
respiratory quinone	Q-10	Q-10	Q-10	Q-10
G+C content (%)	54.3-68.1	63.9	62.7	57.1

## Sheet: Para_Salipiger
	Salipiger (6)	Pelagibaca abyssi	Yangia pacifica
motility	- (4), + (1), gliding (1)	-	+
trophism	chemoheterotrophic/heterotrophic	ND	heterotrophic
aerobic	aerobic (4), anaerobic (1)	aerobic	aerobic
PHA	+ (1), - (2)	-	ND
cytochrome oxidase	+ (5)	+	w
catalase	+	+	+
Na+ requirements	+ (2)	ND	+
fatty acids	18:1 ⍵7c; 16:0; 12:1 3-OH; 19:0 cyclo ⍵8c; 18:0; 16:1 ⍵7c; 15:0 iso 2-OH; 16:1 ⍵6c; 19:0 ⍵8c cyclo; 18:1; iso 15:0 2-OH; 18:1 ⍵6c; 11-methyl 18:1 ⍵7c; 16:0 12:0 3-OH; 18:1 ⍵9c; 10:0 3-OH; 17:0	18:1 ⍵7c; 18:1 ⍵6c; 16:0; 10:0 3-OH	18:1; 16:0; 12:0 3-OH
ubiquinone	Q-10 (4)	Q-10	Q-10
NaCl range	0.25-20	1-13	1-10
temperature range (°C)	4-40	4-40	22-40
pH	5 -10.5	6-9	5-10
G+C content (%)	64.3-67.3	65.9	66.3

## Sheet: Para_Sinirhodobacter
	Sinirhodobacter (3)	Paenirhodobacter enshiensis
phototrohpism	- (2)	-
shape	ovoid/short rod	ovoid/rod
catalase	+	-
oxidase	-	+
motility	+ (2) - (1)	-
spore formation	- (1)	ND
oxygen requirement	faculative anaerobic/aerobic	faculatively anaerobic
ubiquinone	Q-10	Q-10
fatty acids	18:1 ⍵6c; 18:1 ⍵7c; 16:0; 18:0	16:0; 18:1 ⍵7c; 19:0 cyclo ⍵8c; iso-15:0 2-OH; 16:1 ⍵6c; 16:1 ⍵7c
G+C content (%)	65-68	66.8
bateriochlorophyll a	- (2)	+
Na+ requirement	-	-
NaCl range	0-5	0-3
pH	5-7.5	5-8
temperature	15-41	4-42

## Sheet: Para_Tropicibacter
	Tropicibacter (2)	Pelagimonas varians
motility	+	-
shape	rod	irregular rod
Na+ requirement	+	+
catalase	- (1), + (1)	+
oxidase	+	-
nitrate reduction	+ (1), - (1)	-
poly-β-hydroxyalkanoate	+ (1)	ND
Ubiquinone	Q-10	Q-10
fatty acids	18:1 ⍵7c; 16:0; 11 methyl 18:1 ⍵7c; 18:1 ⍵7c; 18:1 ⍵9c; 20:1 ⍵7c; 12:1 3-OH; 11 Methyl 18:1 ⍵7c	10:0 3-OH; 12:1; 14:1 3-OH; 16:0; 18:0; 11-methyl 18:1 ⍵7c
temperature (°C)	10-43	4-37
pH	6-8.5	6-9.5
NaCl	1-15	1.25-8
G+C content (%)	57.9-63.2	55.2
nitrate reduction	+ (1), - (1)	-
carbon utilization
dextrin	+ (1)	ND
L-arabinose	+	+
D-fructose	+	+
D-glucose	+	+
D-lactose	+	+
maltose	+	+
D-mannose	+	+
D-sorbitol	+	+
sucrose	+	+
lactic acid	+ (1)	+
succinic acid	+	ND
L-aspartic acid	+	+
L-alanine	+	+
L-proline	+	+
serine	+	+
inosine	+ (1)	ND
uridine	+ (1)	ND
turanose	+ (1)	ND
xylitol	+ (1)	ND
trehalose	+	+
cellobiose	+	+

## Sheet: Para_Tropicimonas
	Tropicimonas (2)	Pseudoruegeria marinistellae
aerobic	aerobic	faculatively anaerobic
motility	+ (1), - (1)	ND
shape	rod	rod
Na+ requirement	+ (1)	-
PHA	+ (1)	ND
oxidase	+	+
catalase	- (1), + (1)	+
ubiquinone	Q-10	Q-10
fatty acids	18:1 ⍵7c; 18:1 ⍵9c; 16:0; 18:0; anteiso-15:0; 17:1 ⍵7c; 12:0 3-OH; cyclo 19:0 ⍵8c	18:1 ⍵7c; 18:1 ⍵6c
temperature (°C)	10-46	10-41
pH	5.5-10	6-8.5
NaCl range	0-8	0-12
G+C content (%)	64.6-66.4	63

[truncated: 18 more sheets: Poly_Albidovulum, Poly_Celeribacter, Poly_Defluviimonas, Poly_Gemmobacter, Poly_Halocynthiibacter, Poly_Lutimaribacter, Poly_Maribius, Poly_Oceanicola, Poly_Phaeobacter, Poly_Ponticoccus, Poly_Primorskyibacter, Poly_Pseudooceanicola, Poly_Pseudorhodobacter, Poly_Pseudoruegeria, Poly_Roseivivax, Poly_Ruegeria, Poly_Sulfitobacter, Poly_Thalassobius]
