# Supplementary material for: Roseobacters in a Sea of Poly- and Paraphyly: Whole Genome-Based Taxonomy of the Family Rhodobacteraceae and the Proposal for the Split of the “Roseobacter Clade” Into a Novel Family, Roseobacteraceae fam. nov
Source: Front Microbiol. 2021 Jun 25;12:683109. doi: 10.3389/fmicb.2021.683109 (PMC8267831; doi:10.3389/fmicb.2021.683109)
Supplement: Supplementary file 11 [file Table_10.xlsx]

## Sheet: DMSP - summary
Supplementary Table 10. In silico phenotypic analyses of Rhodobacteraceae and Roseobacteraceae fam. nov. Proportion Z-test was used to test significance of difference in proportion of genes present between Rhodobacteraceae and Roseobacteraceae fam. nov.
Family	Isolate name	Dimethylsulfoniopropionate demethylase (EC 2.1.1.269)	3-methylmercaptopropionyl-CoA dehydrogenase (DmdC)	3-methylmercaptopropionyl-CoA ligase (EC 6.2.1.44) of DmdB2 type	3-methylmercaptopropionyl-CoA ligase (EC 6.2.1.44) of DmdB1 type	Dimethylsulfoniopropionate (DSMP) lyase DddP	Dimethylsulfoniopropionate (DSMP) lyase DddQ	Dimethylsulfoniopropionate (DSMP) lyase DddW	Dimethylsulfoniopropionate CoA transferase/lyase DddD, 3-hydroxypropionate generating	Dimethylsulfoniopropionate (DSMP) lyase DddL (EC 4.4.1.3)	Demethylation	Cleavage	Both	Either
Rhizobiaceae	Agrobacterium tumefaciens WRT31	0	0	0	0	0	0	0	0	0	No	No	No	No		Summary - cleavage
Rhizobiaceae	Agrobacterium tumefaciens P4	0	0	0	0	0	0	0	0	0	No	No	No	No		Rhizobiaceae - yes	0	0
Rhizobiaceae	Agrobacterium tumefaciens Ach5	0	0	0	0	0	0	0	0	0	No	No	No	No		Rhizobiaceae - no	3	1
Other	Ahrensia marina LZD062	0	2	0	0	0	0	0	0	0	No	No	No	No		Other - yes	7	0.636364
Other	Ahrensia kielensis DSM_5890	0	0	0	0	0	0	0	1	0	No	Yes	No	Yes		Other - no	4	0.363636
Other	Acuticoccus yangtzensis JL1095	0	3	1	1	0	0	0	0	0	No	No	No	No		Rhodobacteraceae - yes	28	0.373333
Other	Rubrimonas cliftonensis DSM_15345	0	2	1	1	0	0	0	0	1	No	Yes	No	Yes		Rhodobacteraceae - no	47	0.00626667
Other	Oceanicella actignis CGMCC_1.10808	1	3	2	1	0	0	0	0	0	Yes	No	No	Yes		Roseoobacteraceae - yes	157	0.00640816
Other	Albimonas pacifica CGMCC_1.11030	0	2	1	1	0	0	0	0	1	No	Yes	No	Yes		Roseobacteraceae - no	88	0.359184
Other	Albimonas donghaensis DSM_17890	0	2	2	1	0	0	0	0	0	No	No	No	No
Other	Monaibacterium marinum C7	0	3	1	1	0	0	0	0	1	No	Yes	No	Yes		Summary - demethylation
Other	Pontivivens insulae CeCT_8812	1	3	1	1	2	0	0	0	1	Yes	Yes	Yes	Yes		Rhizobiaceae - yes	0	0
Other	Amylibacter kogurei strain_4G11	1	2	1	1	1	0	0	0	0	Yes	Yes	Yes	Yes		Rhizobiaceae - no	3	1
Other	Neptunicoccus sediminis CY02	1	2	1	1	1	0	0	0	0	Yes	Yes	Yes	Yes		Other - yes	4	0.5
Rhodobacteraceae	Pararhodobacter marinus CIC4N-9	0	2	2	2	0	0	0	0	1	No	Yes	No	Yes		Other - no	4	0.5
Rhodobacteraceae	Pararhodobacter aggregans D1-19	0	2	2	1	1	0	0	0	0	No	Yes	No	Yes		Rhodobacteraceae - yes	5	0.0666667
Rhodobacteraceae	Roseicitreum antarcticum CGMCC_1.8894	0	1	0	1	0	0	0	0	0	No	No	No	No		Rhodobacteraceae - no	70	0.933333
Rhodobacteraceae	Roseinatronobacter thiooxidans ALG1	0	2	0	2	0	0	0	0	1	No	Yes	No	Yes		Roseoobacteraceae - yes	128	0.522449
Rhodobacteraceae	Rhodobaca barguzinensis alga05	0	2	0	1	0	0	0	0	1	No	Yes	No	Yes		Roseobacteraceae - no	117	0.477551
Rhodobacteraceae	Roseibaca ekhonensis CECT_7235	0	2	0	2	0	0	0	0	1	No	Yes	No	Yes
Rhodobacteraceae	Roseibaca calidilacus HL-91	0	2	0	2	0	0	0	0	1	No	Yes	No	Yes		Summary - both
Rhodobacteraceae	Defluviimonas indica DSM_24802	0	3	1	1	0	0	0	1	0	No	Yes	No	Yes		Rhizobiaceae - yes	0	0
Rhodobacteraceae	Haematobacter massiliensis CCUG_47968	0	3	1	1	0	0	0	0	0	No	No	No	No		Rhizobiaceae - no	3	1
Rhodobacteraceae	Haematobacter missouriensis H1892	0	2	1	1	0	0	0	0	0	No	No	No	No		Other - yes	3	0.272727
Rhodobacteraceae	Gemmobacter nectariphilus DSM_15620	0	3	2	1	0	0	0	0	0	No	No	No	No		Other - no	8	0.727273
Rhodobacteraceae	Gemmobacter megaterium DSM_26375	0	2	1	1	0	0	0	0	0	No	No	No	No		Rhodobacteraceae - yes	2	0.0266667
Rhodobacteraceae	Cereibacter changlensis DSM_18774	0	2	0	1	1	0	0	0	0	No	Yes	No	Yes		Rhodobacteraceae - no	73	0.973333
Rhodobacteraceae	Rhodobacter ovatus JA234	0	2	0	2	0	0	0	0	0	No	No	No	No		Roseoobacteraceae - yes	99	0.404082
Rhodobacteraceae	Rhodobacter azotoformans KA25	0	2	0	2	0	0	0	0	0	No	No	No	No		Roseobacteraceae - no	146	0.595918
Rhodobacteraceae	Rhodobacter johrii JA192	0	2	0	1	0	0	0	0	0	No	No	No	No
Rhodobacteraceae	Rhodobacter sphaeroides 2.4.1	0	2	0	1	0	0	0	0	1	No	Yes	No	Yes		Summary - either
Rhodobacteraceae	Rhodobacter megalophilus DSM_18937	0	2	0	1	0	0	0	0	1	No	Yes	No	Yes		Rhizobiaceae - yes	0	0
Rhodobacteraceae	Pseudorhodobacter aquimaris KCTC_23043	0	2	0	0	0	0	0	0	0	No	No	No	No		Rhizobiaceae - no	3	1
Rhodobacteraceae	Pseudorhodobacter antarcticus CGMCC_1.10836	1	2	0	2	0	0	0	0	0	Yes	No	No	Yes		Other - yes	8	0.727273
Rhodobacteraceae	Pseudorhodobacter ferrugineus DSM_5888	1	2	0	1	1	0	0	0	0	Yes	Yes	Yes	Yes		Other - no	3	0.272727
Rhodobacteraceae	Pseudorhodobacter wandonensis KCTC_23672	1	2	0	2	0	0	0	0	0	Yes	No	No	Yes		Rhodobacteraceae - yes	31	0.413333
Rhodobacteraceae	Gemmobacter caeni DSM_21823	0	2	0	1	1	0	0	0	0	No	Yes	No	Yes		Rhodobacteraceae - no	44	0.586667
Rhodobacteraceae	Gemmobacter aquatilis DSM_3857	0	3	0	2	0	0	0	0	0	No	No	No	No		Roseoobacteraceae - yes	186	0.759184
Rhodobacteraceae	Pseudorhodobacter psychrotolerans PAMC_27389	0	2	0	1	1	0	0	0	0	No	Yes	No	Yes		Roseobacteraceae - no	59	0.240816
Rhodobacteraceae	Rhodobacter blasticus DSM_2131	0	2	0	1	0	0	0	0	0	No	No	No	No
Rhodobacteraceae	Tabrizicola aquatica RCRI19	0	2	0	0	1	0	0	0	0	No	Yes	No	Yes
Rhodobacteraceae	Albidovulum inexpectatum DSM_12048	1	2	0	1	0	0	0	0	0	Yes	No	No	Yes
Rhodobacteraceae	Defluviimonas aquaemixtae CECT_8626	1	2	0	1	1	0	0	0	0	Yes	Yes	Yes	Yes
Rhodobacteraceae	Defluviimonas denitrificans DSM_18921	0	2	0	1	1	0	0	0	0	No	Yes	No	Yes
Rhodobacteraceae	Defluviimonas alba cai42	0	2	0	1	0	0	0	0	0	No	No	No	No
Rhodobacteraceae	Rhodobacter veldkampii DSM_11550	0	2	0	0	0	0	0	0	0	No	No	No	No
Rhodobacteraceae	Rhodobacter vinaykumarii JA123	0	2	0	0	0	0	0	0	0	No	No	No	No
Rhodobacteraceae	Paenirhodobacter enshiensis DW2-9	0	1	1	0	0	0	0	0	0	No	No	No	No
Rhodobacteraceae	Rhodobacter aestuarii DSM_19945	0	2	0	0	0	0	0	0	0	No	No	No	No
Rhodobacteraceae	Rhodobacter maris JA276	0	2	0	0	0	0	0	0	0	No	No	No	No
Rhodobacteraceae	Rhodobacter viridis JA737	0	2	1	0	0	0	0	0	0	No	No	No	No
Rhodobacteraceae	Rhodobacter capsulatus DSM_1710	0	2	1	0	0	0	0	0	0	No	No	No	No
Rhodobacteraceae	Thioclava arenosa CAU_1312	0	3	0	3	0	0	0	0	0	No	No	No	No
Rhodobacteraceae	Thioclava indica strain_DT23-4	0	3	1	1	0	0	0	0	1	No	Yes	No	Yes
Rhodobacteraceae	Thioclava dalianensis strain_DLFJ1-1	0	3	1	1	0	0	0	1	0	No	Yes	No	Yes
Rhodobacteraceae	Thioclava atlantica 13D2W-2	0	2	1	2	0	0	0	0	1	No	Yes	No	Yes
Rhodobacteraceae	Thioclava marina 11-10-0-13	0	2	0	1	0	0	0	0	1	No	Yes	No	Yes
Rhodobacteraceae	Thioclava pacifica DSM_10166	0	2	0	1	0	0	0	0	1	No	Yes	No	Yes
Rhodobacteraceae	Thioclava nitratireducens 25B10_4	0	2	0	1	0	0	0	0	1	No	Yes	No	Yes
Rhodobacteraceae	Thioclava sediminum TAW-CT134	0	2	0	1	0	0	0	0	1	No	Yes	No	Yes
Rhodobacteraceae	Thioclava electrotropha Elox9	0	2	0	1	0	0	0	1	1	No	Yes	No	Yes
Rhodobacteraceae	Paracoccus chinensis CGMCC_1.7655	0	2	1	1	0	0	0	0	0	No	No	No	No
Rhodobacteraceae	Paracoccus solventivorans DSM_6637	0	3	2	2	0	0	0	0	0	No	No	No	No
Rhodobacteraceae	Paracoccus alkenifer DSM_11593	0	2	2	0	0	0	0	0	0	No	No	No	No
Rhodobacteraceae	Paracoccus contaminans RKI_16-01929	0	2	1	0	0	0	0	0	0	No	No	No	No
Rhodobacteraceae	Paracoccus sanguinis DSM_29303	0	2	1	0	0	0	0	0	0	No	No	No	No
Rhodobacteraceae	Paracoccus sphaerophysae HAMBI_3106	0	2	1	0	0	0	0	0	0	No	No	No	No
Rhodobacteraceae	Paracoccus sulfuroxidans LW36_1	0	2	0	1	0	0	0	0	0	No	No	No	No
Rhodobacteraceae	Paracoccus aminophilus JCM_7686	0	2	0	1	0	0	0	0	0	No	No	No	No
Rhodobacteraceae	Paracoccus halophilus CGMCC_1.6117	0	2	1	1	0	0	0	0	0	No	No	No	No
Rhodobacteraceae	Paracoccus lutimaris strain_CECT_8525	0	2	0	0	0	0	0	0	0	No	No	No	No
Rhodobacteraceae	Paracoccus laeviglucosivorans 3P_1	0	2	0	1	0	0	0	0	0	No	No	No	No
Rhodobacteraceae	Paracoccus yeei ATCC_BAA-599	0	2	0	0	1	0	0	0	0	No	Yes	No	Yes
Rhodobacteraceae	Paracoccus aminovorans DSM_8537	0	2	0	1	0	0	0	0	0	No	No	No	No
Rhodobacteraceae	Paracoccus pantotrophus DSM_2944	0	2	0	1	0	0	0	0	0	No	No	No	No
Rhodobacteraceae	Paracoccus bengalensis DSM_17099	0	2	0	0	0	0	0	0	0	No	No	No	No
Rhodobacteraceae	Paracoccus versutus DSM_582	0	2	0	1	0	0	0	0	0	No	No	No	No
Rhodobacteraceae	Paracoccus isoporae DSM_22220	0	2	1	0	0	0	0	0	0	No	No	No	No
Rhodobacteraceae	Paracoccus zhejiangensis J6	0	2	2	0	1	0	0	0	0	No	Yes	No	Yes
Rhodobacteraceae	Paracoccus alcaliphilus DSM_8512	0	2	0	1	0	0	0	0	0	No	No	No	No
Rhodobacteraceae	Paracoccus siganidrum strain_M26	0	2	0	1	0	0	0	0	0	No	No	No	No
Rhodobacteraceae	Paracoccus sediminis DSM_26170	0	2	0	0	0	0	0	0	0	No	No	No	No
Rhodobacteraceae	Paracoccus zeaxanthinifaciens ATCC_21588	0	2	0	0	0	0	0	0	0	No	No	No	No
Rhodobacteraceae	Paracoccus aestuarii DSM_19484	0	2	1	0	0	0	0	0	0	No	No	No	No
Rhodobacteraceae	Paracoccus tibetensis CGMCC_1.8925	0	2	0	0	0	0	0	0	0	No	No	No	No
Rhodobacteraceae	Paracoccus seriniphilus DSM_14827	0	2	1	1	0	0	0	0	0	No	No	No	No
Rhodobacteraceae	Paracoccus homiensis DSM_17862	0	2	1	0	1	0	0	1	0	No	Yes	No	Yes
Rhodobacteraceae	Paracoccus saliphilus DSM_18447	0	2	1	0	0	0	0	0	0	No	No	No	No
Rhodobacteraceae	Methylarcula marina VKM_B-2159	0	2	1	0	0	0	0	1	0	No	Yes	No	Yes
Roseobacteraceae	Confluentimicrobium lipolyticum CECT_8621	0	2	1	1	0	0	0	0	0	No	No	No	No
Roseobacteraceae	Actibacterium pelagium JN33	0	2	0	1	0	0	0	1	0	No	Yes	No	Yes
Roseobacteraceae	Actibacterium ureilyticum LS-811	0	2	0	1	0	0	0	0	0	No	No	No	No
Roseobacteraceae	Actibacterium atlanticum 22II-S11-z10	0	3	0	3	0	0	0	0	0	No	No	No	No
Roseobacteraceae	Actibacterium mucosum KCTC_23349	0	2	0	1	0	0	0	0	0	No	No	No	No
Roseobacteraceae	Rhodovulum imhoffii DSM_18064	0	2	0	1	0	0	0	0	0	No	No	No	No
Roseobacteraceae	Rhodovulum robiginosum DSM_12329	0	2	0	1	0	0	0	0	1	No	Yes	No	Yes
Roseobacteraceae	Rhodovulum sulfidophilum DSM_1374	0	2	0	1	0	0	0	0	0	No	No	No	No
Roseobacteraceae	Rhodovulum kholense DSM_19783	0	2	0	1	0	0	0	0	0	No	No	No	No
Roseobacteraceae	Rhodovulum viride JA756	0	2	0	1	0	0	0	0	0	No	No	No	No
Roseobacteraceae	Oceanicola litoreus DSM_29440	1	2	1	1	1	0	0	0	1	Yes	Yes	Yes	Yes
Roseobacteraceae	Celeribacter manganoxidans DY25	0	2	0	1	0	0	0	0	0	No	No	No	No
Roseobacteraceae	Tropicimonas sediminicola DSM_29339	0	2	0	0	1	0	0	0	1	No	Yes	No	Yes
Roseobacteraceae	Tropicimonas isoalkanivorans DSM_19548	0	2	0	1	0	0	0	0	0	No	No	No	No
Roseobacteraceae	Pseudoruegeria marinistellae SF-16	0	2	0	0	1	0	0	0	0	No	Yes	No	Yes
Roseobacteraceae	Pseudoruegeria haliotis DSM_29328	0	2	0	0	1	0	0	0	0	No	Yes	No	Yes
Roseobacteraceae	Pseudoruegeria lutimaris DSM_25294	0	2	0	0	0	0	0	0	1	No	Yes	No	Yes
Roseobacteraceae	Pseudoruegeria sabulilitoris GJMS-35	0	2	0	0	0	0	0	0	1	No	Yes	No	Yes
Roseobacteraceae	Planktomarina temperata RCA23	1	2	0	1	1	0	0	0	0	Yes	Yes	Yes	Yes
Roseobacteraceae	Nereida ignava CECT_5292	1	2	0	2	0	0	0	0	0	Yes	No	No	Yes
Roseobacteraceae	Litoreibacter ponti DSM_100977	1	2	0	1	1	0	0	0	0	Yes	Yes	Yes	Yes
Roseobacteraceae	Litoreibacter arenae DSM_19593	1	2	0	1	1	0	0	0	0	Yes	Yes	Yes	Yes
Roseobacteraceae	Litoreibacter janthinus DSM_26921	1	2	0	1	1	0	0	0	0	Yes	Yes	Yes	Yes
Roseobacteraceae	Litoreibacter albidus DSM_26922	1	2	0	1	0	0	0	0	0	Yes	No	No	Yes
Roseobacteraceae	Litoreibacter meonggei DSM_29466	1	2	0	1	1	0	0	0	0	Yes	Yes	Yes	Yes
Roseobacteraceae	Litoreibacter ascidiaceicola DSM_100566	1	2	0	1	1	0	0	0	0	Yes	Yes	Yes	Yes
Roseobacteraceae	Litoreibacter halocynthiae MA1-10_1	1	2	0	1	1	0	0	0	0	Yes	Yes	Yes	Yes
Roseobacteraceae	Nioella nitratireducens SSW136	1	2	1	2	1	0	0	0	0	Yes	Yes	Yes	Yes
Roseobacteraceae	Nioella sediminis JS7-11	3	3	0	1	1	0	0	0	0	Yes	Yes	Yes	Yes
Roseobacteraceae	Roseicyclus mahoneyensis DSM_16097	0	2	0	1	0	0	0	0	0	No	No	No	No
Roseobacteraceae	Roseibacterium elongatum DSM_19469	2	2	0	1	1	0	0	0	1	Yes	Yes	Yes	Yes
Roseobacteraceae	Dinoroseobacter shibae DFL_12	1	2	0	1	0	0	0	0	1	Yes	Yes	Yes	Yes
Roseobacteraceae	Thalassobacter stenotrophicus CECT_5294	1	3	0	1	1	0	0	0	1	Yes	Yes	Yes	Yes
Roseobacteraceae	Jannaschia aquimarina GSW-M26	1	2	0	1	0	0	0	0	0	Yes	No	No	Yes
Roseobacteraceae	Jannaschia seohaensis DSM_25227	1	2	0	1	1	0	0	0	2	Yes	Yes	Yes	Yes
Roseobacteraceae	Jannaschia pohangensis DSM_19073	1	2	0	1	0	0	0	0	1	Yes	Yes	Yes	Yes
Roseobacteraceae	Jannaschia rubra CECT_5088	1	2	0	1	0	0	0	0	0	Yes	No	No	Yes
Roseobacteraceae	Jannaschia helgolandensis DSM_14858	1	2	0	1	0	0	0	0	0	Yes	No	No	Yes
Roseobacteraceae	Jannaschia donghaensis CECT_7802	1	2	0	1	0	0	0	0	1	Yes	Yes	Yes	Yes
Roseobacteraceae	Jannaschia faecimaris DSM_100420	1	2	0	1	0	0	0	0	0	Yes	No	No	Yes
Roseobacteraceae	Brevirhabdus pacifica 22DY15	1	2	1	1	0	0	0	0	0	Yes	No	No	Yes
Roseobacteraceae	Albidovulum xiamenense CGMCC_1.10789	1	2	1	1	0	0	0	0	0	Yes	No	No	Yes
Roseobacteraceae	Hasllibacter halocynthiae DSM_29318	0	2	0	0	0	0	0	0	0	No	No	No	No
Roseobacteraceae	Boseongicola aestuarii CECT_8489	1	2	0	2	1	0	0	0	0	Yes	Yes	Yes	Yes
Roseobacteraceae	Silicimonas algicola DSM_103371	1	2	0	0	0	0	0	0	0	No	No	No	No
Roseobacteraceae	Roseivivax roseus DSM_23042	0	2	0	1	0	0	0	0	1	No	Yes	No	Yes
Roseobacteraceae	Maribius pontilimi GH1_23_1	0	2	0	0	0	0	0	0	0	No	No	No	No
Roseobacteraceae	Tranquillimonas alkanivorans DSM_19547	0	2	0	1	0	0	0	0	0	No	No	No	No
Roseobacteraceae	Oceaniglobus indicus 1-19b	0	2	0	1	0	0	0	0	0	No	No	No	No
Roseobacteraceae	Kandeliimicrobium roseum XY-R6	1	2	0	1	0	0	0	0	0	Yes	No	No	Yes
Roseobacteraceae	Oceaniovalibus guishaninsula JLT2003	0	2	1	1	0	0	0	0	0	No	No	No	No
Roseobacteraceae	Hwanghaeicola aestuarii DSM_22009	0	2	0	0	0	0	0	0	1	No	Yes	No	Yes
Roseobacteraceae	Palleronia abyssalis CECT_8504	0	2	0	1	0	0	0	0	0	No	No	No	No
Roseobacteraceae	Palleronia marisminoris CECT_7066	0	2	0	0	0	0	0	0	0	No	No	No	No
Roseobacteraceae	Maribius salinus DSM_26892	1	2	0	1	0	0	0	0	0	Yes	No	No	Yes
Roseobacteraceae	Maribius pelagius DSM_26893	1	2	0	1	0	0	0	0	0	Yes	No	No	Yes
Roseobacteraceae	Pseudoruegeria aquimaris CECT_7680	0	2	0	0	1	0	0	0	0	No	Yes	No	Yes
Roseobacteraceae	Halocynthiibacter arcticus PAMC_20958	0	2	0	0	0	0	0	0	0	No	No	No	No
Roseobacteraceae	Halocynthiibacter namhaensis RA2-3	1	3	0	1	1	0	0	0	0	Yes	Yes	Yes	Yes
Roseobacteraceae	Maritimibacter alkaliphilus HTCC2654	0	2	1	1	0	0	0	0	1	No	Yes	No	Yes
Roseobacteraceae	Aliiroseovarius crassostreae CV919-312	1	2	0	1	0	0	0	0	0	Yes	No	No	Yes
Roseobacteraceae	Aliiroseovarius sediminilitoris DSM_29439	1	2	1	1	0	0	0	0	0	Yes	No	No	Yes
Roseobacteraceae	Aliiroseovarius pelagivivens CECT_8811	1	2	0	1	0	0	0	0	0	Yes	No	No	Yes
Roseobacteraceae	Aliiroseovarius halocynthiae MA1_10_1	1	2	1	1	0	0	0	0	0	Yes	No	No	Yes
Roseobacteraceae	Aquimixticola soesokkakensis CECT_8620	0	2	0	0	0	0	0	0	0	No	No	No	No
Roseobacteraceae	Pacificibacter maritimus DSM_104731	0	2	0	0	0	0	0	0	0	No	No	No	No
Roseobacteraceae	Pacificibacter marinus DSM_25228	0	2	0	0	0	0	0	0	0	No	No	No	No
Roseobacteraceae	Celeribacter marinus IMCC_12053	0	2	0	0	0	0	0	0	0	No	No	No	No
Roseobacteraceae	Celeribacter baekdonensis DSM_27375	0	3	0	1	0	0	0	0	0	No	No	No	No
Roseobacteraceae	Celeribacter indicus P73	0	2	0	0	0	0	0	0	0	No	No	No	No
Roseobacteraceae	Celeribacter halophilus ZXM137	0	2	0	0	0	0	0	1	0	No	Yes	No	Yes
Roseobacteraceae	Celeribacter neptunius DSM_26471	0	2	0	0	0	0	0	0	0	No	No	No	No
Roseobacteraceae	Celeribacter persicus DSM_100434	0	2	0	1	0	0	0	0	0	No	No	No	No
Roseobacteraceae	Celeribacter ethanolicus NH195	0	3	0	2	0	0	0	0	0	No	No	No	No
Roseobacteraceae	Marivivens niveibacter MCCC_1A06712	0	2	0	1	0	0	0	0	0	No	No	No	No
Roseobacteraceae	Pseudooctadecabacter jejudonensis CECT_8397	1	2	0	1	1	0	0	0	0	Yes	Yes	Yes	Yes
Roseobacteraceae	Octadecabacter arcticus 238	1	2	0	3	1	0	0	0	0	Yes	Yes	Yes	Yes
Roseobacteraceae	Octadecabacter antarcticus 307	1	2	0	1	1	0	0	0	0	Yes	Yes	Yes	Yes
Roseobacteraceae	Octadecabacter temperatus SB1	1	2	0	1	1	0	0	0	0	Yes	Yes	Yes	Yes
Roseobacteraceae	Octadecabacter ascidiaceicola CECT_8868	1	2	0	1	1	0	0	0	0	Yes	Yes	Yes	Yes
Roseobacteraceae	Oceanicola granulosus HTCC2516	1	2	0	0	1	0	0	0	0	No	Yes	No	Yes
Roseobacteraceae	Roseisalinus antarcticus CECT_7023	0	2	0	0	0	0	0	1	0	No	Yes	No	Yes
Roseobacteraceae	Wenxinia saemankumensis DSM_100565	0	2	0	0	0	0	0	0	0	No	No	No	No
Roseobacteraceae	Wenxinia marina DSM_24838	0	2	0	1	0	0	0	0	0	No	No	No	No
Roseobacteraceae	Pseudoroseicyclus aestuarii CECT_9025	0	2	0	0	0	0	0	0	0	No	No	No	No
Roseobacteraceae	Limimaricola pyoseonensis DSM_21424	0	2	0	0	0	0	0	0	0	No	No	No	No
Roseobacteraceae	Limimaricola hongkongensis DSM_17492	0	2	0	0	0	0	1	0	0	No	Yes	No	Yes
Roseobacteraceae	Limimaricola cinnabarinus LL-001	0	3	0	0	0	0	0	1	0	No	Yes	No	Yes
Roseobacteraceae	Limimaricola soesokkakensis CECT_8367	0	2	0	0	0	0	1	0	0	No	Yes	No	Yes
Roseobacteraceae	Flavimaricola marinus CECT_8899	1	2	0	1	1	0	0	1	0	Yes	Yes	Yes	Yes
Roseobacteraceae	Loktanella fryxellensis DSM_16213	0	2	0	1	0	0	0	0	0	No	No	No	No
Roseobacteraceae	Loktanella salsilacus DSM_16199	0	2	0	2	0	0	0	1	0	No	Yes	No	Yes
Roseobacteraceae	Loktanella atrilutea DSM_29326	1	2	0	1	0	0	0	0	0	Yes	No	No	Yes
Roseobacteraceae	Cognatiyoonia sediminum DSM_28715	1	2	0	1	2	0	0	0	0	Yes	Yes	Yes	Yes
Roseobacteraceae	Cognatiyoonia koreensis DSM_17925	1	2	0	1	1	0	0	0	0	Yes	Yes	Yes	Yes
Roseobacteraceae	Yoonia sediminilitoris DSM_29955	1	2	0	2	0	0	0	1	0	Yes	Yes	Yes	Yes
Roseobacteraceae	Yoonia vestfoldensis DSM_16212	0	2	0	1	0	0	0	0	1	No	Yes	No	Yes
Roseobacteraceae	Yoonia maritima DSM_101533	1	2	0	0	0	0	0	0	1	No	Yes	No	Yes
Roseobacteraceae	Yoonia tamlensis DSM_26879	0	2	0	0	0	0	0	0	1	No	Yes	No	Yes
Roseobacteraceae	Yoonia litorea DSM_29433	1	2	0	1	1	0	0	0	0	Yes	Yes	Yes	Yes
Roseobacteraceae	Yoonia rosea DSM_29591	1	2	0	1	0	0	0	0	0	Yes	No	No	Yes
Roseobacteraceae	Yoonia maricola DSM_29128	1	2	0	1	1	0	0	0	0	Yes	Yes	Yes	Yes
Roseobacteraceae	Salinihabitans flavidus DSM_27842	0	2	1	1	0	0	0	0	1	No	Yes	No	Yes
Roseobacteraceae	Thalassobius activus CECT_5113	1	2	0	1	0	0	0	0	0	Yes	No	No	Yes
Roseobacteraceae	Cognatishimia maritima DSM_28223	0	2	0	1	0	0	0	0	0	No	No	No	No
Roseobacteraceae	Pseudopelagicola gijangensis DSM_100564	1	3	1	1	1	0	0	0	0	Yes	Yes	Yes	Yes
Roseobacteraceae	Shimia aestuarii DSM_15283	1	3	2	2	1	0	0	0	0	Yes	Yes	Yes	Yes
Roseobacteraceae	Shimia abyssi DSM_100673	1	2	1	1	1	0	0	0	0	Yes	Yes	Yes	Yes
Roseobacteraceae	Shimia isoporae SW6_1	1	2	1	1	1	0	0	0	0	Yes	Yes	Yes	Yes
Roseobacteraceae	Shimia haliotis DSM_28453	1	2	1	1	1	0	0	0	0	Yes	Yes	Yes	Yes
Roseobacteraceae	Shimia marina CECT_7688	2	2	1	2	0	0	0	0	0	Yes	No	No	Yes
Roseobacteraceae	Shimia sagamensis JAMH011_1	1	2	1	1	0	0	0	0	0	Yes	No	No	Yes
Roseobacteraceae	Pseudooceanicola antarcticus Ar-45	0	2	1	0	0	0	0	0	0	No	No	No	No
Roseobacteraceae	Pseudooceanicola marinus LMG_23705	0	2	1	2	0	0	0	0	0	No	No	No	No
Roseobacteraceae	Pseudooceanicola nanhaiensis DSM_18065	0	2	3	1	0	0	1	0	1	No	Yes	No	Yes
Roseobacteraceae	Pseudooceanicola nitratireducens DSM_29619	0	2	3	1	0	0	0	0	1	No	Yes	No	Yes
Roseobacteraceae	Pseudooceanicola atlanticus 2II-s11g	0	3	2	1	0	0	0	0	0	No	No	No	No
Roseobacteraceae	Pseudooceanicola batsensis HTCC2597	0	3	2	1	0	0	1	0	1	No	Yes	No	Yes
Roseobacteraceae	Sediminimonas qiaohouensis DSM_21189	1	2	1	2	0	0	0	0	0	Yes	No	No	Yes
Roseobacteraceae	Lutimaribacter saemankumensis DSM_28010	1	2	1	2	1	0	0	0	1	Yes	Yes	Yes	Yes
Roseobacteraceae	Lutimaribacter pacificus W11_2B_1	0	3	2	1	1	0	0	0	0	No	Yes	No	Yes
Roseobacteraceae	Litorimicrobium taeanense DSM_22007	0	3	2	1	0	0	0	0	1	No	Yes	No	Yes
Roseobacteraceae	Lutimaribacter litoralis KU5D5_1	0	3	2	1	0	0	0	0	1	No	Yes	No	Yes
Roseobacteraceae	Thalassobius gelatinovorus CECT_4357	0	2	2	1	0	0	0	0	0	No	No	No	No
Roseobacteraceae	Thalassobius autumnalis CECT_5118	1	2	2	1	0	0	0	0	0	Yes	No	No	Yes
Roseobacteraceae	Thalassobius mediterraneus CECT_5383	0	3	3	1	0	0	0	1	0	No	Yes	No	Yes
Roseobacteraceae	Roseovarius nubinhibens ISM	2	2	0	1	1	0	0	0	0	Yes	Yes	Yes	Yes
Roseobacteraceae	Pelagivirga sediminicola BH-SD19	0	0	0	0	2	0	0	0	1	No	Yes	No	Yes
Roseobacteraceae	Roseovarius nanhaiticus DSM_29590	0	0	0	1	1	0	0	1	0	No	Yes	No	Yes
Roseobacteraceae	Roseovarius albus CECT_7450	1	2	0	2	1	0	0	1	0	Yes	Yes	Yes	Yes
Roseobacteraceae	Pelagicola litorisediminis CECT_8287	1	2	1	2	1	0	0	0	0	Yes	Yes	Yes	Yes
Roseobacteraceae	Roseovarius aestuarii CECT_7745	3	2	0	1	1	1	0	0	0	Yes	Yes	Yes	Yes
Roseobacteraceae	Roseovarius lutimaris DSM_28463	1	3	1	1	1	0	0	0	1	Yes	Yes	Yes	Yes
Roseobacteraceae	Roseovarius marisflavi DSM_29327	1	2	1	2	1	0	0	0	1	Yes	Yes	Yes	Yes
Roseobacteraceae	Roseovarius gaetbuli CECT_8370	1	2	1	2	1	0	0	0	1	Yes	Yes	Yes	Yes
Roseobacteraceae	Roseovarius tolerans DSM_11457	1	2	1	2	1	0	0	0	1	Yes	Yes	Yes	Yes
Roseobacteraceae	Roseovarius nitratireducens TFZ	2	2	1	1	1	0	0	0	0	Yes	Yes	Yes	Yes
Roseobacteraceae	Roseovarius azorensis DSM_100674	1	2	1	2	1	0	0	0	0	Yes	Yes	Yes	Yes
Roseobacteraceae	Roseovarius mucosus DSM_17069	2	3	1	3	1	0	0	0	0	Yes	Yes	Yes	Yes
Roseobacteraceae	Roseovarius indicus B108	1	2	1	2	1	0	0	0	1	Yes	Yes	Yes	Yes
Roseobacteraceae	Roseovarius atlanticus R12B	1	2	1	1	1	0	0	0	0	Yes	Yes	Yes	Yes
Roseobacteraceae	Roseovarius confluentis SAG6	1	2	1	1	1	0	0	0	0	Yes	Yes	Yes	Yes
Roseobacteraceae	Roseovarius salinarum N53	1	2	1	1	1	0	0	0	0	Yes	Yes	Yes	Yes
Roseobacteraceae	Roseovarius pacificus DSM_29589	0	2	0	2	1	0	0	0	0	No	Yes	No	Yes
Roseobacteraceae	Roseovarius litoreus 1	2	2	1	2	0	0	0	0	0	Yes	No	No	Yes
Roseobacteraceae	Roseovarius halotolerans DSM_29507	1	2	0	1	0	0	0	0	1	Yes	Yes	Yes	Yes
Roseobacteraceae	Pseudaestuariivita atlantica 22II-S11-z3	1	2	0	1	1	0	0	0	0	Yes	Yes	Yes	Yes
Roseobacteraceae	Rhodosalinus sediminis WDN1C137	0	2	1	1	0	0	0	0	0	No	No	No	No
Roseobacteraceae	Poseidonocella pacifica DSM_29316	1	2	0	0	0	0	0	1	0	No	Yes	No	Yes
Roseobacteraceae	Poseidonocella sedimentorum KMM_9023	0	2	0	0	0	0	0	1	0	No	Yes	No	Yes
Roseobacteraceae	Marinovum algicola FF3	1	2	1	2	1	0	0	0	0	Yes	Yes	Yes	Yes
Roseobacteraceae	Donghicola eburneus DSM_29127	1	3	0	3	0	0	0	0	0	Yes	No	No	Yes
Roseobacteraceae	Donghicola tyrosinivorans DSM_100212	1	3	0	2	0	0	0	0	0	Yes	No	No	Yes
Roseobacteraceae	Puniceibacterium antarcticum SM1211	0	2	1	1	0	0	0	0	1	No	Yes	No	Yes
Roseobacteraceae	Puniceibacterium sediminis DSM_29052	0	2	1	1	0	0	0	0	1	No	Yes	No	Yes
Roseobacteraceae	Primorskyibacter marinus PX7	0	2	1	1	0	0	0	0	0	No	No	No	No
Roseobacteraceae	Pseudooceanicola flagellatus CGMCC_1.12644	0	2	1	1	0	0	0	0	0	No	No	No	No
Roseobacteraceae	Primorskyibacter insulae CECT_8871	0	2	1	1	0	0	0	0	0	No	No	No	No
Roseobacteraceae	Marivita hallyeonensis DSM_29431	1	2	1	1	1	0	0	0	1	Yes	Yes	Yes	Yes
Roseobacteraceae	Marivita geojedonensis DPG-138	1	2	1	1	1	0	0	0	1	Yes	Yes	Yes	Yes
Roseobacteraceae	Marivita cryptomonadis CL-SK44	1	2	1	2	1	0	0	0	1	Yes	Yes	Yes	Yes
Roseobacteraceae	Thalassococcus halodurans DSM_26915	0	2	1	2	0	0	0	0	0	No	No	No	No
Roseobacteraceae	Roseivivax lentus DSM_29430	0	2	1	2	0	0	1	0	0	No	Yes	No	Yes
Roseobacteraceae	Roseivivax halotolerans JCM_10271	0	2	1	2	0	0	0	0	0	No	No	No	No
Roseobacteraceae	Roseivivax isoporae LMG_25204	0	2	1	1	0	0	0	0	1	No	Yes	No	Yes
Roseobacteraceae	Roseivivax jejudonensis CECT_8625	0	2	1	1	0	0	0	0	1	No	Yes	No	Yes
Roseobacteraceae	Roseivivax marinus DSM_27511	0	2	0	1	0	0	0	0	1	No	Yes	No	Yes
Roseobacteraceae	Roseivivax halodurans JCM_10272	0	2	1	2	0	0	1	0	0	No	Yes	No	Yes
Roseobacteraceae	Salipiger mucosus DSM_16094	0	2	0	3	0	0	0	0	0	No	No	No	No
Roseobacteraceae	Salipiger marinus DSM_26424	0	2	0	1	0	0	0	0	0	No	No	No	No
Roseobacteraceae	Yangia pacifica CGMCC_1.3455	0	2	0	0	0	0	0	0	1	No	Yes	No	Yes
Roseobacteraceae	Salipiger aestuarii DSM_22011	0	2	0	1	0	0	0	0	0	No	No	No	No
Roseobacteraceae	Salipiger thiooxidans DSM_10146	0	2	0	1	0	0	1	1	0	No	Yes	No	Yes
Roseobacteraceae	Salipiger profundus JLT2016	0	2	0	1	0	0	0	0	0	No	No	No	No
Roseobacteraceae	Salipiger bermudensis HTCC2601	0	2	0	1	0	0	0	0	0	No	No	No	No
Roseobacteraceae	Pelagibaca abyssi JLT2014	0	3	0	3	0	0	1	0	0	No	Yes	No	Yes
Roseobacteraceae	Citreimonas salinaria DSM_26880	0	2	0	1	0	0	0	0	0	No	No	No	No
Roseobacteraceae	Roseivivax pacificus DSM_29329	0	2	1	1	0	0	0	0	0	No	No	No	No
Roseobacteraceae	Tropicibacter naphthalenivorans DSM_19561	0	2	1	1	0	0	0	0	0	No	No	No	No
Roseobacteraceae	Pelagimonas varians DSM_23678	2	3	1	1	0	0	0	1	0	Yes	Yes	Yes	Yes
Roseobacteraceae	Tropicibacter phthalicicus CECT_8649	1	3	1	1	1	0	0	0	0	Yes	Yes	Yes	Yes
Roseobacteraceae	Ponticocus litoralis GL_GR66	0	2	2	1	0	0	0	0	0	No	No	No	No
Roseobacteraceae	Sagittula stellata E-37	0	2	1	1	0	0	0	1	0	No	Yes	No	Yes
Roseobacteraceae	Ponticoccus marisrubri SJ5A-1	0	2	1	1	1	0	1	0	0	No	Yes	No	Yes
Roseobacteraceae	Maliponia aquimaris CECT_8898	1	2	1	1	1	0	1	0	0	Yes	Yes	Yes	Yes
Roseobacteraceae	Mameliella alba CGMCC_1.7290	0	2	1	1	1	0	1	0	0	No	Yes	No	Yes
Roseobacteraceae	Antarctobacter heliothermus DSM_11445	0	2	1	1	1	0	0	0	0	No	Yes	No	Yes
Roseobacteraceae	Planktotalea frisia SH6-1	2	3	1	2	1	0	0	0	0	Yes	Yes	Yes	Yes
Roseobacteraceae	Planktotalea arctica IMCC9565	1	2	1	2	1	0	0	1	0	Yes	Yes	Yes	Yes
Roseobacteraceae	Sulfitobacter pseudonitzschiae H3	0	2	3	2	0	0	0	0	1	No	Yes	No	Yes
Roseobacteraceae	Ascidiaceihabitans donghaensis CECT_8599	1	2	1	4	1	0	0	0	0	Yes	Yes	Yes	Yes
Roseobacteraceae	Roseobacter litoralis Och_149	1	2	0	1	1	0	0	0	0	Yes	Yes	Yes	Yes
Roseobacteraceae	Roseobacter denitrificans OCh_114_DSM_7001	1	2	0	1	1	0	0	0	0	Yes	Yes	Yes	Yes
Roseobacteraceae	Sulfitobacter guttiformis DSM_11458	1	2	1	1	0	0	0	0	1	Yes	Yes	Yes	Yes
Roseobacteraceae	Sulfitobacter donghicola DSW-25	0	2	1	1	1	0	0	0	1	No	Yes	No	Yes
Roseobacteraceae	Sulfitobacter marinus DSM_23422	2	2	1	1	0	0	0	0	0	Yes	No	No	Yes
Roseobacteraceae	Sulfitobacter litoralis DSM_17584	0	2	1	1	0	0	0	0	1	No	Yes	No	Yes
Roseobacteraceae	Sulfitobacter pontiacus DSM_10014	1	2	2	1	0	0	0	0	1	Yes	Yes	Yes	Yes
Roseobacteraceae	Sulfitobacter brevis DSM_11443	2	2	1	1	1	0	0	0	0	Yes	Yes	Yes	Yes
Roseobacteraceae	Sulfitobacter delicatus DSM_16477	1	2	2	1	0	0	0	0	0	Yes	No	No	Yes
Roseobacteraceae	Sulfitobacter dubius DSM_16472	1	2	1	1	0	0	0	0	0	Yes	No	No	Yes
Roseobacteraceae	Sulfitobacter indolifex HEL-45	1	2	1	1	0	0	0	0	0	Yes	No	No	Yes
Roseobacteraceae	Sulfitobacter mediterraneus DSM_12244	2	3	1	2	1	0	0	0	0	Yes	Yes	Yes	Yes
Roseobacteraceae	Sulfitobacter geojensis MM-124	1	2	1	1	1	0	0	1	0	Yes	Yes	Yes	Yes
Roseobacteraceae	Sulfitobacter noctilucicola NB-77	1	2	1	1	1	0	0	0	1	Yes	Yes	Yes	Yes
Roseobacteraceae	Sulfitobacter noctilucae NB-68	1	2	2	1	1	0	0	0	1	Yes	Yes	Yes	Yes
Roseobacteraceae	Aestuariivita boseongensis BS-B2	1	3	1	1	1	0	0	0	0	Yes	Yes	Yes	Yes
Roseobacteraceae	Pseudodonghicola xiamenensis DSM_18339	0	3	1	1	0	0	0	0	0	No	No	No	No
Roseobacteraceae	Marinibacterium profundimaris 22II1-22F33	0	3	1	1	0	0	0	0	0	No	No	No	No
Roseobacteraceae	Sedimentitalea nanhaiensis DSM_24252	1	4	1	1	1	0	0	0	0	Yes	Yes	Yes	Yes
Roseobacteraceae	Ruegeria kandeliae J95	0	2	2	1	1	0	0	0	1	No	Yes	No	Yes
Roseobacteraceae	Pseudooceanicola lipolyticus 157	0	2	1	1	1	0	0	0	1	No	Yes	No	Yes
Roseobacteraceae	Jhaorihella thermophila DSM_23413	1	2	1	1	1	0	0	0	0	Yes	Yes	Yes	Yes
Roseobacteraceae	Cribrihabitans marinus DSM_29340	0	2	1	2	1	0	0	0	1	No	Yes	No	Yes
Roseobacteraceae	Ruegeria pomeroyi DSS-3	2	3	1	1	1	1	1	1	0	Yes	Yes	Yes	Yes
Roseobacteraceae	Ruegeria marina CGMCC_1.9108	1	2	1	5	1	0	1	1	0	Yes	Yes	Yes	Yes
Roseobacteraceae	Ruegeria marisrubri ZGT118	1	2	1	1	1	0	0	1	0	Yes	Yes	Yes	Yes
Roseobacteraceae	Ruegeria arenilitoris CECT_8715	1	2	1	1	1	0	0	0	0	Yes	Yes	Yes	Yes
Roseobacteraceae	Ruegeria intermedia CC_GIMAT_2_1	1	2	1	1	1	0	0	0	0	Yes	Yes	Yes	Yes
Roseobacteraceae	Ruegeria lacuscaerulensis ITI-1157	1	2	1	1	1	0	0	0	0	Yes	Yes	Yes	Yes
Roseobacteraceae	Ruegeria conchae TW15	1	2	1	1	1	0	0	0	0	Yes	Yes	Yes	Yes
Roseobacteraceae	Ruegeria halocynthiae DSM_27839	1	2	1	1	1	0	0	0	0	Yes	Yes	Yes	Yes
Roseobacteraceae	Ruegeria profundi ZGT108	1	2	1	3	1	0	0	0	0	Yes	Yes	Yes	Yes
Roseobacteraceae	Ruegeria denitrificans CECT_5091	1	2	1	1	1	0	0	0	0	Yes	Yes	Yes	Yes
Roseobacteraceae	Ruegeria atlantica CECT_4292	1	2	1	1	1	0	0	0	0	Yes	Yes	Yes	Yes
Roseobacteraceae	Ruegeria meonggei CECT_8411	1	2	1	1	1	0	0	0	0	Yes	Yes	Yes	Yes
Roseobacteraceae	Ruegeria Faecimaris HD_28_2	2	2	1	2	1	0	0	0	0	Yes	Yes	Yes	Yes
Roseobacteraceae	Ruegeria litorea R37_CECT_7639	1	5	3	2	2	0	1	0	0	Yes	Yes	Yes	Yes
Roseobacteraceae	Ruegeria mediterranea M17	1	6	3	2	1	0	1	0	0	Yes	Yes	Yes	Yes
Roseobacteraceae	Epibacterium ulvae U95	0	2	0	0	0	0	0	0	0	No	No	No	No
Roseobacteraceae	Epibacterium multivorans DSM_26470	1	2	0	1	1	0	0	1	0	Yes	Yes	Yes	Yes
Roseobacteraceae	Tritonibacter horizontis O3.65	0	2	2	1	0	0	0	0	0	No	No	No	No
Roseobacteraceae	Epibacterium scottomollicae DSM_25328	2	2	1	2	1	0	0	0	0	Yes	Yes	Yes	Yes
Roseobacteraceae	Epibacterium mobile DSM_23403	1	2	0	1	1	0	0	0	0	Yes	Yes	Yes	Yes
Roseobacteraceae	Pseudophaeobacter leonis 306	0	5	2	3	0	0	1	0	0	No	Yes	No	Yes
Roseobacteraceae	Pseudophaeobacter arcticus DSM_23566	2	4	1	1	0	0	1	0	0	Yes	Yes	Yes	Yes
Roseobacteraceae	Phaeobacter italicus CECT_7645	1	2	1	1	1	0	0	0	0	Yes	Yes	Yes	Yes
Roseobacteraceae	Phaeobacter porticola strain_P97	0	2	1	1	1	0	0	0	0	No	Yes	No	Yes
Roseobacteraceae	Phaeobacter gallaeciensis DSM_26640	0	2	1	1	1	0	0	0	0	No	Yes	No	Yes
Roseobacteraceae	Phaeobacter inhibens DSM_16374	0	3	1	1	1	0	0	0	0	No	Yes	No	Yes
Roseobacteraceae	Leisingera aquimarina DSM_24565	2	3	0	3	1	0	0	1	0	Yes	Yes	Yes	Yes
Roseobacteraceae	Leisingera methylohalidivorans DSM_14336	1	3	0	1	1	0	0	1	0	Yes	Yes	Yes	Yes
Roseobacteraceae	Leisingera caerulea DSM_24564	1	2	0	2	1	0	0	0	0	Yes	Yes	Yes	Yes
Roseobacteraceae	Leisingera aquaemixtae CECT_8399	1	2	0	2	1	0	0	0	0	Yes	Yes	Yes	Yes
Roseobacteraceae	Leisingera daeponensis DSM_23529	1	2	0	1	1	0	0	0	0	Yes	Yes	Yes	Yes

## Sheet: DMSP - proportion Z-test
Cleavage	Number present	Total	Proportion
Roseobacteraceae	157	245	0.640816
Rhodobacteraceae	28	75	0.373333
Z-score	4.1042
P-value	<0.00001
Demethylation	Number present	Total	Proportion
Roseobacteraceae	128	245	0.522449
Rhodobacteraceae	5	75	0.0666667
Z-score	7.0081
P-value	<0.00001
Both	Number present	Total	Proportion
Roseobacteraceae	99	245	0.404082
Rhodobacteraceae	2	75	0.0266667
Z-score	6.1535
P-value	<0.00001

## Sheet: QS - summary
Family	Isolate name	Autoinducer-binding transcriptional regulator, LuxR family	Autoinducer synthesis protein raiI	Quorum sensing
Rhizobiaceae	Agrobacterium tumefaciens WRT31	0	0	No		Summary
Rhizobiaceae	Agrobacterium tumefaciens P4	0	0	No		Rhizobiaceae - yes	0	0
Rhizobiaceae	Agrobacterium tumefaciens Ach5	0	0	No		Rhizobiaceae - no	3	1
Other	Ahrensia marina LZD062	1	0	No		Other - yes	0	0
Other	Ahrensia kielensis DSM_5890	1	0	No		Other - no	11	1
Other	Acuticoccus yangtzensis JL1095	0	0	No		Rhodobacteraceae - yes	3	0.04
Other	Rubrimonas cliftonensis DSM_15345	0	0	No		Rhodobacteraceae - no	72	0.96
Other	Oceanicella actignis CGMCC_1.10808	0	1	No		Roseoobacteraceae - yes	138	0.563265
Other	Albimonas pacifica CGMCC_1.11030	0	2	No		Roseobacteraceae - no	107	0.436735
Other	Albimonas donghaensis DSM_17890	0	2	No
Other	Monaibacterium marinum C7	0	0	No
Other	Pontivivens insulae CeCT_8812	0	0	No
Other	Amylibacter kogurei strain_4G11	0	1	No
Other	Neptunicoccus sediminis CY02	0	1	No
Rhodobacteraceae	Pararhodobacter marinus CIC4N-9	1	0	No
Rhodobacteraceae	Pararhodobacter aggregans D1-19	1	0	No
Rhodobacteraceae	Roseicitreum antarcticum CGMCC_1.8894	1	0	No
Rhodobacteraceae	Roseinatronobacter thiooxidans ALG1	1	0	No
Rhodobacteraceae	Rhodobaca barguzinensis alga05	1	0	No
Rhodobacteraceae	Roseibaca ekhonensis CECT_7235	0	0	No
Rhodobacteraceae	Roseibaca calidilacus HL-91	0	0	No
Rhodobacteraceae	Defluviimonas indica DSM_24802	1	0	No
Rhodobacteraceae	Haematobacter massiliensis CCUG_47968	0	0	No
Rhodobacteraceae	Haematobacter missouriensis H1892	0	0	No
Rhodobacteraceae	Gemmobacter nectariphilus DSM_15620	1	0	No
Rhodobacteraceae	Gemmobacter megaterium DSM_26375	1	0	No
Rhodobacteraceae	Cereibacter changlensis DSM_18774	2	0	No
Rhodobacteraceae	Rhodobacter ovatus JA234	1	0	No
Rhodobacteraceae	Rhodobacter azotoformans KA25	1	0	No
Rhodobacteraceae	Rhodobacter johrii JA192	1	0	No
Rhodobacteraceae	Rhodobacter sphaeroides 2.4.1	1	0	No
Rhodobacteraceae	Rhodobacter megalophilus DSM_18937	1	0	No
Rhodobacteraceae	Pseudorhodobacter aquimaris KCTC_23043	0	0	No
Rhodobacteraceae	Pseudorhodobacter antarcticus CGMCC_1.10836	0	0	No
Rhodobacteraceae	Pseudorhodobacter ferrugineus DSM_5888	0	0	No
Rhodobacteraceae	Pseudorhodobacter wandonensis KCTC_23672	1	0	No
Rhodobacteraceae	Gemmobacter caeni DSM_21823	1	0	No
Rhodobacteraceae	Gemmobacter aquatilis DSM_3857	1	0	No
Rhodobacteraceae	Pseudorhodobacter psychrotolerans PAMC_27389	0	0	No
Rhodobacteraceae	Rhodobacter blasticus DSM_2131	1	0	No
Rhodobacteraceae	Tabrizicola aquatica RCRI19	1	0	No
Rhodobacteraceae	Albidovulum inexpectatum DSM_12048	2	1	Yes
Rhodobacteraceae	Defluviimonas aquaemixtae CECT_8626	1	1	Yes
Rhodobacteraceae	Defluviimonas denitrificans DSM_18921	1	1	Yes
Rhodobacteraceae	Defluviimonas alba cai42	1	0	No
Rhodobacteraceae	Rhodobacter veldkampii DSM_11550	1	0	No
Rhodobacteraceae	Rhodobacter vinaykumarii JA123	1	0	No
Rhodobacteraceae	Paenirhodobacter enshiensis DW2-9	1	0	No
Rhodobacteraceae	Rhodobacter aestuarii DSM_19945	1	0	No
Rhodobacteraceae	Rhodobacter maris JA276	2	0	No
Rhodobacteraceae	Rhodobacter viridis JA737	1	0	No
Rhodobacteraceae	Rhodobacter capsulatus DSM_1710	1	0	No
Rhodobacteraceae	Thioclava arenosa CAU_1312	1	0	No
Rhodobacteraceae	Thioclava indica strain_DT23-4	1	0	No
Rhodobacteraceae	Thioclava dalianensis strain_DLFJ1-1	1	0	No
Rhodobacteraceae	Thioclava atlantica 13D2W-2	2	0	No
Rhodobacteraceae	Thioclava marina 11-10-0-13	1	0	No
Rhodobacteraceae	Thioclava pacifica DSM_10166	2	0	No
Rhodobacteraceae	Thioclava nitratireducens 25B10_4	1	0	No
Rhodobacteraceae	Thioclava sediminum TAW-CT134	1	0	No
Rhodobacteraceae	Thioclava electrotropha Elox9	1	0	No
Rhodobacteraceae	Paracoccus chinensis CGMCC_1.7655	0	0	No
Rhodobacteraceae	Paracoccus solventivorans DSM_6637	0	0	No
Rhodobacteraceae	Paracoccus alkenifer DSM_11593	0	0	No
Rhodobacteraceae	Paracoccus contaminans RKI_16-01929	0	0	No
Rhodobacteraceae	Paracoccus sanguinis DSM_29303	0	0	No
Rhodobacteraceae	Paracoccus sphaerophysae HAMBI_3106	0	0	No
Rhodobacteraceae	Paracoccus sulfuroxidans LW36_1	1	0	No
Rhodobacteraceae	Paracoccus aminophilus JCM_7686	1	0	No
Rhodobacteraceae	Paracoccus halophilus CGMCC_1.6117	1	0	No
Rhodobacteraceae	Paracoccus lutimaris strain_CECT_8525	1	0	No
Rhodobacteraceae	Paracoccus laeviglucosivorans 3P_1	1	0	No
Rhodobacteraceae	Paracoccus yeei ATCC_BAA-599	1	0	No
Rhodobacteraceae	Paracoccus aminovorans DSM_8537	1	0	No
Rhodobacteraceae	Paracoccus pantotrophus DSM_2944	1	0	No
Rhodobacteraceae	Paracoccus bengalensis DSM_17099	1	0	No
Rhodobacteraceae	Paracoccus versutus DSM_582	1	0	No
Rhodobacteraceae	Paracoccus isoporae DSM_22220	0	0	No
Rhodobacteraceae	Paracoccus zhejiangensis J6	1	0	No
Rhodobacteraceae	Paracoccus alcaliphilus DSM_8512	1	0	No
Rhodobacteraceae	Paracoccus siganidrum strain_M26	1	0	No
Rhodobacteraceae	Paracoccus sediminis DSM_26170	0	0	No
Rhodobacteraceae	Paracoccus zeaxanthinifaciens ATCC_21588	1	0	No
Rhodobacteraceae	Paracoccus aestuarii DSM_19484	1	0	No
Rhodobacteraceae	Paracoccus tibetensis CGMCC_1.8925	1	0	No
Rhodobacteraceae	Paracoccus seriniphilus DSM_14827	1	0	No
Rhodobacteraceae	Paracoccus homiensis DSM_17862	0	0	No
Rhodobacteraceae	Paracoccus saliphilus DSM_18447	0	0	No
Rhodobacteraceae	Methylarcula marina VKM_B-2159	0	0	No
Roseobacteraceae	Confluentimicrobium lipolyticum CECT_8621	1	0	No
Roseobacteraceae	Actibacterium pelagium JN33	1	0	No
Roseobacteraceae	Actibacterium ureilyticum LS-811	2	0	No
Roseobacteraceae	Actibacterium atlanticum 22II-S11-z10	1	0	No
Roseobacteraceae	Actibacterium mucosum KCTC_23349	1	0	No
Roseobacteraceae	Rhodovulum imhoffii DSM_18064	1	0	No
Roseobacteraceae	Rhodovulum robiginosum DSM_12329	1	0	No
Roseobacteraceae	Rhodovulum sulfidophilum DSM_1374	1	1	Yes
Roseobacteraceae	Rhodovulum kholense DSM_19783	1	1	Yes
Roseobacteraceae	Rhodovulum viride JA756	1	1	Yes
Roseobacteraceae	Oceanicola litoreus DSM_29440	1	1	Yes
Roseobacteraceae	Celeribacter manganoxidans DY25	1	0	No
Roseobacteraceae	Tropicimonas sediminicola DSM_29339	1	1	Yes
Roseobacteraceae	Tropicimonas isoalkanivorans DSM_19548	1	1	Yes
Roseobacteraceae	Pseudoruegeria marinistellae SF-16	1	1	Yes
Roseobacteraceae	Pseudoruegeria haliotis DSM_29328	1	0	No
Roseobacteraceae	Pseudoruegeria lutimaris DSM_25294	1	0	No
Roseobacteraceae	Pseudoruegeria sabulilitoris GJMS-35	1	1	Yes
Roseobacteraceae	Planktomarina temperata RCA23	0	0	No
Roseobacteraceae	Nereida ignava CECT_5292	0	1	No
Roseobacteraceae	Litoreibacter ponti DSM_100977	1	1	Yes
Roseobacteraceae	Litoreibacter arenae DSM_19593	1	1	Yes
Roseobacteraceae	Litoreibacter janthinus DSM_26921	1	1	Yes
Roseobacteraceae	Litoreibacter albidus DSM_26922	1	1	Yes
Roseobacteraceae	Litoreibacter meonggei DSM_29466	1	1	Yes
Roseobacteraceae	Litoreibacter ascidiaceicola DSM_100566	1	1	Yes
Roseobacteraceae	Litoreibacter halocynthiae MA1-10_1	1	1	Yes
Roseobacteraceae	Nioella nitratireducens SSW136	1	0	No
Roseobacteraceae	Nioella sediminis JS7-11	1	0	No
Roseobacteraceae	Roseicyclus mahoneyensis DSM_16097	0	0	No
Roseobacteraceae	Roseibacterium elongatum DSM_19469	0	0	No
Roseobacteraceae	Dinoroseobacter shibae DFL_12	1	1	Yes
Roseobacteraceae	Thalassobacter stenotrophicus CECT_5294	1	1	Yes
Roseobacteraceae	Jannaschia aquimarina GSW-M26	1	0	No
Roseobacteraceae	Jannaschia seohaensis DSM_25227	2	1	Yes
Roseobacteraceae	Jannaschia pohangensis DSM_19073	1	1	Yes
Roseobacteraceae	Jannaschia rubra CECT_5088	1	1	Yes
Roseobacteraceae	Jannaschia helgolandensis DSM_14858	1	0	No
Roseobacteraceae	Jannaschia donghaensis CECT_7802	1	0	No
Roseobacteraceae	Jannaschia faecimaris DSM_100420	0	1	No
Roseobacteraceae	Brevirhabdus pacifica 22DY15	1	1	Yes
Roseobacteraceae	Albidovulum xiamenense CGMCC_1.10789	2	1	Yes
Roseobacteraceae	Hasllibacter halocynthiae DSM_29318	1	0	No
Roseobacteraceae	Boseongicola aestuarii CECT_8489	1	1	Yes
Roseobacteraceae	Silicimonas algicola DSM_103371	0	1	No
Roseobacteraceae	Roseivivax roseus DSM_23042	1	0	No
Roseobacteraceae	Maribius pontilimi GH1_23_1	0	1	No
Roseobacteraceae	Tranquillimonas alkanivorans DSM_19547	1	0	No
Roseobacteraceae	Oceaniglobus indicus 1-19b	1	1	Yes
Roseobacteraceae	Kandeliimicrobium roseum XY-R6	1	1	Yes
Roseobacteraceae	Oceaniovalibus guishaninsula JLT2003	0	0	No
Roseobacteraceae	Hwanghaeicola aestuarii DSM_22009	0	1	No
Roseobacteraceae	Palleronia abyssalis CECT_8504	0	0	No
Roseobacteraceae	Palleronia marisminoris CECT_7066	0	1	No
Roseobacteraceae	Maribius salinus DSM_26892	0	0	No
Roseobacteraceae	Maribius pelagius DSM_26893	0	0	No
Roseobacteraceae	Pseudoruegeria aquimaris CECT_7680	1	1	Yes
Roseobacteraceae	Halocynthiibacter arcticus PAMC_20958	1	1	Yes
Roseobacteraceae	Halocynthiibacter namhaensis RA2-3	1	1	Yes
Roseobacteraceae	Maritimibacter alkaliphilus HTCC2654	1	1	Yes
Roseobacteraceae	Aliiroseovarius crassostreae CV919-312	1	1	Yes
Roseobacteraceae	Aliiroseovarius sediminilitoris DSM_29439	1	1	Yes
Roseobacteraceae	Aliiroseovarius pelagivivens CECT_8811	1	1	Yes
Roseobacteraceae	Aliiroseovarius halocynthiae MA1_10_1	1	1	Yes
Roseobacteraceae	Aquimixticola soesokkakensis CECT_8620	1	1	Yes
Roseobacteraceae	Pacificibacter maritimus DSM_104731	0	1	No
Roseobacteraceae	Pacificibacter marinus DSM_25228	1	2	Yes
Roseobacteraceae	Celeribacter marinus IMCC_12053	1	1	Yes
Roseobacteraceae	Celeribacter baekdonensis DSM_27375	1	1	Yes
Roseobacteraceae	Celeribacter indicus P73	1	1	Yes
Roseobacteraceae	Celeribacter halophilus ZXM137	1	1	Yes
Roseobacteraceae	Celeribacter neptunius DSM_26471	1	1	Yes
Roseobacteraceae	Celeribacter persicus DSM_100434	1	1	Yes
Roseobacteraceae	Celeribacter ethanolicus NH195	1	1	Yes
Roseobacteraceae	Marivivens niveibacter MCCC_1A06712	1	0	No
Roseobacteraceae	Pseudooctadecabacter jejudonensis CECT_8397	1	1	Yes
Roseobacteraceae	Octadecabacter arcticus 238	1	0	No
Roseobacteraceae	Octadecabacter antarcticus 307	2	1	Yes
Roseobacteraceae	Octadecabacter temperatus SB1	1	0	No
Roseobacteraceae	Octadecabacter ascidiaceicola CECT_8868	1	0	No
Roseobacteraceae	Oceanicola granulosus HTCC2516	0	0	No
Roseobacteraceae	Roseisalinus antarcticus CECT_7023	1	1	Yes
Roseobacteraceae	Wenxinia saemankumensis DSM_100565	1	0	No
Roseobacteraceae	Wenxinia marina DSM_24838	1	0	No
Roseobacteraceae	Pseudoroseicyclus aestuarii CECT_9025	1	0	No
Roseobacteraceae	Limimaricola pyoseonensis DSM_21424	1	0	No
Roseobacteraceae	Limimaricola hongkongensis DSM_17492	0	0	No
Roseobacteraceae	Limimaricola cinnabarinus LL-001	0	0	No
Roseobacteraceae	Limimaricola soesokkakensis CECT_8367	0	0	No
Roseobacteraceae	Flavimaricola marinus CECT_8899	1	1	Yes
Roseobacteraceae	Loktanella fryxellensis DSM_16213	0	1	No
Roseobacteraceae	Loktanella salsilacus DSM_16199	0	1	No
Roseobacteraceae	Loktanella atrilutea DSM_29326	1	1	Yes
Roseobacteraceae	Cognatiyoonia sediminum DSM_28715	1	1	Yes
Roseobacteraceae	Cognatiyoonia koreensis DSM_17925	1	1	Yes
Roseobacteraceae	Yoonia sediminilitoris DSM_29955	1	1	Yes
Roseobacteraceae	Yoonia vestfoldensis DSM_16212	1	0	No
Roseobacteraceae	Yoonia maritima DSM_101533	1	0	No
Roseobacteraceae	Yoonia tamlensis DSM_26879	1	1	Yes
Roseobacteraceae	Yoonia litorea DSM_29433	1	0	No
Roseobacteraceae	Yoonia rosea DSM_29591	1	0	No
Roseobacteraceae	Yoonia maricola DSM_29128	1	0	No
Roseobacteraceae	Salinihabitans flavidus DSM_27842	1	1	Yes
Roseobacteraceae	Thalassobius activus CECT_5113	2	0	No
Roseobacteraceae	Cognatishimia maritima DSM_28223	2	0	No
Roseobacteraceae	Pseudopelagicola gijangensis DSM_100564	1	1	Yes
Roseobacteraceae	Shimia aestuarii DSM_15283	1	1	Yes
Roseobacteraceae	Shimia abyssi DSM_100673	1	1	Yes
Roseobacteraceae	Shimia isoporae SW6_1	1	0	No
Roseobacteraceae	Shimia haliotis DSM_28453	1	0	No
Roseobacteraceae	Shimia marina CECT_7688	1	0	No
Roseobacteraceae	Shimia sagamensis JAMH011_1	1	0	No
Roseobacteraceae	Pseudooceanicola antarcticus Ar-45	1	0	No
Roseobacteraceae	Pseudooceanicola marinus LMG_23705	2	0	No
Roseobacteraceae	Pseudooceanicola nanhaiensis DSM_18065	1	0	No
Roseobacteraceae	Pseudooceanicola nitratireducens DSM_29619	1	0	No
Roseobacteraceae	Pseudooceanicola atlanticus 2II-s11g	1	0	No
Roseobacteraceae	Pseudooceanicola batsensis HTCC2597	1	0	No
Roseobacteraceae	Sediminimonas qiaohouensis DSM_21189	1	1	Yes
Roseobacteraceae	Lutimaribacter saemankumensis DSM_28010	1	0	No
Roseobacteraceae	Lutimaribacter pacificus W11_2B_1	1	0	No
Roseobacteraceae	Litorimicrobium taeanense DSM_22007	2	1	Yes
Roseobacteraceae	Lutimaribacter litoralis KU5D5_1	2	1	Yes
Roseobacteraceae	Thalassobius gelatinovorus CECT_4357	2	0	No
Roseobacteraceae	Thalassobius autumnalis CECT_5118	2	0	No
Roseobacteraceae	Thalassobius mediterraneus CECT_5383	1	0	No
Roseobacteraceae	Roseovarius nubinhibens ISM	1	0	No
Roseobacteraceae	Pelagivirga sediminicola BH-SD19	0	0	No
Roseobacteraceae	Roseovarius nanhaiticus DSM_29590	0	0	No
Roseobacteraceae	Roseovarius albus CECT_7450	2	0	No
Roseobacteraceae	Pelagicola litorisediminis CECT_8287	2	0	No
Roseobacteraceae	Roseovarius aestuarii CECT_7745	2	1	Yes
Roseobacteraceae	Roseovarius lutimaris DSM_28463	2	1	Yes
Roseobacteraceae	Roseovarius marisflavi DSM_29327	2	1	Yes
Roseobacteraceae	Roseovarius gaetbuli CECT_8370	2	1	Yes
Roseobacteraceae	Roseovarius tolerans DSM_11457	2	0	No
Roseobacteraceae	Roseovarius nitratireducens TFZ	2	0	No
Roseobacteraceae	Roseovarius azorensis DSM_100674	2	1	Yes
Roseobacteraceae	Roseovarius mucosus DSM_17069	2	0	No
Roseobacteraceae	Roseovarius indicus B108	1	0	No
Roseobacteraceae	Roseovarius atlanticus R12B	1	0	No
Roseobacteraceae	Roseovarius confluentis SAG6	1	0	No
Roseobacteraceae	Roseovarius salinarum N53	2	0	No
Roseobacteraceae	Roseovarius pacificus DSM_29589	2	1	Yes
Roseobacteraceae	Roseovarius litoreus 1	1	1	Yes
Roseobacteraceae	Roseovarius halotolerans DSM_29507	2	0	No
Roseobacteraceae	Pseudaestuariivita atlantica 22II-S11-z3	1	1	Yes
Roseobacteraceae	Rhodosalinus sediminis WDN1C137	1	0	No
Roseobacteraceae	Poseidonocella pacifica DSM_29316	1	1	Yes
Roseobacteraceae	Poseidonocella sedimentorum KMM_9023	1	1	Yes
Roseobacteraceae	Marinovum algicola FF3	1	1	Yes
Roseobacteraceae	Donghicola eburneus DSM_29127	1	0	No
Roseobacteraceae	Donghicola tyrosinivorans DSM_100212	1	0	No
Roseobacteraceae	Puniceibacterium antarcticum SM1211	0	1	No
Roseobacteraceae	Puniceibacterium sediminis DSM_29052	1	1	Yes
Roseobacteraceae	Primorskyibacter marinus PX7	1	1	Yes
Roseobacteraceae	Pseudooceanicola flagellatus CGMCC_1.12644	1	1	Yes
Roseobacteraceae	Primorskyibacter insulae CECT_8871	1	0	No
Roseobacteraceae	Marivita hallyeonensis DSM_29431	1	1	Yes
Roseobacteraceae	Marivita geojedonensis DPG-138	1	1	Yes
Roseobacteraceae	Marivita cryptomonadis CL-SK44	1	1	Yes
Roseobacteraceae	Thalassococcus halodurans DSM_26915	1	1	Yes
Roseobacteraceae	Roseivivax lentus DSM_29430	1	2	Yes
Roseobacteraceae	Roseivivax halotolerans JCM_10271	1	0	No
Roseobacteraceae	Roseivivax isoporae LMG_25204	2	1	Yes
Roseobacteraceae	Roseivivax jejudonensis CECT_8625	2	1	Yes
Roseobacteraceae	Roseivivax marinus DSM_27511	2	1	Yes
Roseobacteraceae	Roseivivax halodurans JCM_10272	2	1	Yes
Roseobacteraceae	Salipiger mucosus DSM_16094	1	1	Yes
Roseobacteraceae	Salipiger marinus DSM_26424	1	1	Yes
Roseobacteraceae	Yangia pacifica CGMCC_1.3455	1	0	No
Roseobacteraceae	Salipiger aestuarii DSM_22011	1	1	Yes
Roseobacteraceae	Salipiger thiooxidans DSM_10146	2	1	Yes
Roseobacteraceae	Salipiger profundus JLT2016	1	1	Yes
Roseobacteraceae	Salipiger bermudensis HTCC2601	1	0	No
Roseobacteraceae	Pelagibaca abyssi JLT2014	1	1	Yes
Roseobacteraceae	Citreimonas salinaria DSM_26880	0	1	No
Roseobacteraceae	Roseivivax pacificus DSM_29329	1	1	Yes
Roseobacteraceae	Tropicibacter naphthalenivorans DSM_19561	2	1	Yes
Roseobacteraceae	Pelagimonas varians DSM_23678	1	1	Yes
Roseobacteraceae	Tropicibacter phthalicicus CECT_8649	2	1	Yes
Roseobacteraceae	Ponticocus litoralis GL_GR66	2	1	Yes
Roseobacteraceae	Sagittula stellata E-37	1	1	Yes
Roseobacteraceae	Ponticoccus marisrubri SJ5A-1	1	1	Yes
Roseobacteraceae	Maliponia aquimaris CECT_8898	1	1	Yes
Roseobacteraceae	Mameliella alba CGMCC_1.7290	1	1	Yes
Roseobacteraceae	Antarctobacter heliothermus DSM_11445	1	1	Yes
Roseobacteraceae	Planktotalea frisia SH6-1	1	1	Yes
Roseobacteraceae	Planktotalea arctica IMCC9565	1	1	Yes
Roseobacteraceae	Sulfitobacter pseudonitzschiae H3	2	1	Yes
Roseobacteraceae	Ascidiaceihabitans donghaensis CECT_8599	1	0	No
Roseobacteraceae	Roseobacter litoralis Och_149	0	1	No
Roseobacteraceae	Roseobacter denitrificans OCh_114_DSM_7001	0	0	No
Roseobacteraceae	Sulfitobacter guttiformis DSM_11458	1	1	Yes
Roseobacteraceae	Sulfitobacter donghicola DSW-25	1	1	Yes
Roseobacteraceae	Sulfitobacter marinus DSM_23422	0	1	No
Roseobacteraceae	Sulfitobacter litoralis DSM_17584	0	0	No
Roseobacteraceae	Sulfitobacter pontiacus DSM_10014	0	0	No
Roseobacteraceae	Sulfitobacter brevis DSM_11443	0	1	No
Roseobacteraceae	Sulfitobacter delicatus DSM_16477	1	0	No
Roseobacteraceae	Sulfitobacter dubius DSM_16472	1	0	No
Roseobacteraceae	Sulfitobacter indolifex HEL-45	1	0	No
Roseobacteraceae	Sulfitobacter mediterraneus DSM_12244	1	0	No
Roseobacteraceae	Sulfitobacter geojensis MM-124	1	1	Yes
Roseobacteraceae	Sulfitobacter noctilucicola NB-77	1	1	Yes
Roseobacteraceae	Sulfitobacter noctilucae NB-68	1	1	Yes
Roseobacteraceae	Aestuariivita boseongensis BS-B2	1	1	Yes
Roseobacteraceae	Pseudodonghicola xiamenensis DSM_18339	2	0	No
Roseobacteraceae	Marinibacterium profundimaris 22II1-22F33	1	1	Yes
Roseobacteraceae	Sedimentitalea nanhaiensis DSM_24252	2	1	Yes
Roseobacteraceae	Ruegeria kandeliae J95	1	1	Yes
Roseobacteraceae	Pseudooceanicola lipolyticus 157	1	1	Yes
Roseobacteraceae	Jhaorihella thermophila DSM_23413	1	1	Yes
Roseobacteraceae	Cribrihabitans marinus DSM_29340	2	1	Yes
Roseobacteraceae	Ruegeria pomeroyi DSS-3	2	1	Yes
Roseobacteraceae	Ruegeria marina CGMCC_1.9108	2	1	Yes
Roseobacteraceae	Ruegeria marisrubri ZGT118	2	1	Yes
Roseobacteraceae	Ruegeria arenilitoris CECT_8715	2	2	Yes
Roseobacteraceae	Ruegeria intermedia CC_GIMAT_2_1	2	1	Yes
Roseobacteraceae	Ruegeria lacuscaerulensis ITI-1157	2	2	Yes
Roseobacteraceae	Ruegeria conchae TW15	2	1	Yes
Roseobacteraceae	Ruegeria halocynthiae DSM_27839	2	1	Yes
Roseobacteraceae	Ruegeria profundi ZGT108	2	1	Yes
Roseobacteraceae	Ruegeria denitrificans CECT_5091	2	1	Yes
Roseobacteraceae	Ruegeria atlantica CECT_4292	2	2	Yes
Roseobacteraceae	Ruegeria meonggei CECT_8411	2	1	Yes
Roseobacteraceae	Ruegeria Faecimaris HD_28_2	2	1	Yes
Roseobacteraceae	Ruegeria litorea R37_CECT_7639	2	1	Yes
Roseobacteraceae	Ruegeria mediterranea M17	2	1	Yes
Roseobacteraceae	Epibacterium ulvae U95	1	0	No
Roseobacteraceae	Epibacterium multivorans DSM_26470	1	0	No
Roseobacteraceae	Tritonibacter horizontis O3.65	1	0	No
Roseobacteraceae	Epibacterium scottomollicae DSM_25328	1	0	No
Roseobacteraceae	Epibacterium mobile DSM_23403	1	0	No
Roseobacteraceae	Pseudophaeobacter leonis 306	1	1	Yes
Roseobacteraceae	Pseudophaeobacter arcticus DSM_23566	1	1	Yes
Roseobacteraceae	Phaeobacter italicus CECT_7645	1	1	Yes
Roseobacteraceae	Phaeobacter porticola strain_P97	1	1	Yes
Roseobacteraceae	Phaeobacter gallaeciensis DSM_26640	1	1	Yes
Roseobacteraceae	Phaeobacter inhibens DSM_16374	1	1	Yes
Roseobacteraceae	Leisingera aquimarina DSM_24565	1	1	Yes
Roseobacteraceae	Leisingera methylohalidivorans DSM_14336	1	1	Yes
Roseobacteraceae	Leisingera caerulea DSM_24564	1	1	Yes
Roseobacteraceae	Leisingera aquaemixtae CECT_8399	1	1	Yes
Roseobacteraceae	Leisingera daeponensis DSM_23529	1	1	Yes

## Sheet: QS - proportion Z-test
AHL - quorum sensing	Number present	Total	Proportion
Roseobacteraceae	138	245	0.563265
Rhodobacteraceae	3	75	0.04
Z-score	7.9868
P-value	<0.00001

## Sheet: Bifuraction tree list
All Rhodobacteraceae/Roseobacteraceae isolates (100%/100%)
Low salinity (49/8.6)								High salinity (39/89)
Quorum sensing (QS)+ (1.3/3.7)				QS– (48/4.9)				QS+ (2.7/51)				QS– (36/38)
Dimethylsulfoniopropionate (DMSP)+ (1.3/3.3)			DMSP– (0/0.41)	DMSP+ (13.3/2.4)			DMSP– (34.7/2.4)	DMSP+ (2.7/42)			DMSP– (0/9.4)	DMSP+ (21/27)			DMSP– (15/11)
DMSP cleavage (1.3/2.4)	Both (1.3/1.6)	DMSP demethylation (1.3/2.4)		DMSP cleavage (13/2.4)	Both (0/1.2)	DMSP demethylation (0/1.2)		DMSP cleavage (1.3/38)	Both (0/25)	DMSP demethylation (1.3/29)		DMSP cleavage (19/20)	Both (1.3/11)	DMSP demethylation (4/18)
Defluviimonas aquaemixtae CECT_8626	Defluviimonas aquaemixtae CECT_8626	Defluviimonas aquaemixtae CECT_8626	Aquimixticola soesokkakensis CECT_8620	Roseinatronobacter thiooxidans ALG1	Nioella sediminis JS7-11	Nioella sediminis JS7-11	Roseicitreum antarcticum CGMCC_1.8894	Defluviimonas denitrificans DSM_18921	Oceanicola litoreus DSM_29440	Albidovulum inexpectatum DSM_12048	Rhodovulum sulfidophilum DSM_1374	Pararhodobacter marinus CIC4N-9	Pseudorhodobacter ferrugineus DSM_5888	Pseudorhodobacter antarcticus CGMCC_1.10836	Gemmobacter megaterium DSM_26375
Pseudoruegeria sabulilitoris GJMS-35	Litoreibacter janthinus DSM_26921	Litoreibacter janthinus DSM_26921		Rhodobaca barguzinensis alga05	Roseibacterium elongatum DSM_19469	Roseibacterium elongatum DSM_19469	Haematobacter massiliensis CCUG_47968	Oceanicola litoreus DSM_29440	Litoreibacter ponti DSM_100977	Oceanicola litoreus DSM_29440	Rhodovulum viride JA756	Pararhodobacter aggregans D1-19	Planktomarina temperata RCA23	Pseudorhodobacter ferrugineus DSM_5888	Pseudorhodobacter aquimaris KCTC_23043
Litoreibacter janthinus DSM_26921	Pseudooctadecabacter jejudonensis CECT_8397	Albidovulum xiamenense CGMCC_1.10789		Cereibacter changlensis DSM_18774	Roseovarius confluentis SAG6	Roseovarius confluentis SAG6	Haematobacter missouriensis H1892	Tropicimonas sediminicola DSM_29339	Litoreibacter arenae DSM_19593	Litoreibacter ponti DSM_100977	Tropicimonas isoalkanivorans DSM_19548	Roseibaca ekhonensis CECT_7235	Nioella nitratireducens SSW136	Pseudorhodobacter wandonensis KCTC_23672	Rhodobacter vinaykumarii JA123
Pseudooctadecabacter jejudonensis CECT_8397	Ruegeria lacuscaerulensis ITI-1157	Kandeliimicrobium roseum XY-R6		Rhodobacter megalophilus DSM_18937			Gemmobacter nectariphilus DSM_15620	Pseudoruegeria marinistellae SF-16	Litoreibacter meonggei DSM_29466	Litoreibacter arenae DSM_19593	Oceaniglobus indicus 1-19b	Defluviimonas indica DSM_24802	Jannaschia donghaensis CECT_7802	Planktomarina temperata RCA23	Rhodobacter maris JA276
Roseivivax jejudonensis CECT_8625	Leisingera aquaemixtae CECT_8399	Pseudooctadecabacter jejudonensis CECT_8397		Gemmobacter caeni DSM_21823			Rhodobacter ovatus JA234	Litoreibacter ponti DSM_100977	Litoreibacter ascidiaceicola DSM_100566	Litoreibacter albidus DSM_26922	Halocynthiibacter arcticus PAMC_20958	Pseudorhodobacter ferrugineus DSM_5888	Octadecabacter arcticus 238	Nereida ignava CECT_5292	Paracoccus halophilus CGMCC_1.6117
Ruegeria lacuscaerulensis ITI-1157		Ruegeria lacuscaerulensis ITI-1157		Pseudorhodobacter psychrotolerans PAMC_27389			Rhodobacter azotoformans KA25	Litoreibacter arenae DSM_19593	Litoreibacter halocynthiae MA1-10_1	Litoreibacter meonggei DSM_29466	Pacificibacter marinus DSM_25228	Thioclava indica strain_DT23-4	Octadecabacter temperatus SB1	Nioella nitratireducens SSW136	Paracoccus lutimaris strain_CECT_8525
Leisingera aquaemixtae CECT_8399		Leisingera aquaemixtae CECT_8399		Tabrizicola aquatica RCRI19			Rhodobacter johrii JA192	Litoreibacter meonggei DSM_29466	Dinoroseobacter shibae DFL_12	Litoreibacter ascidiaceicola DSM_100566	Celeribacter marinus IMCC_12053	Thioclava dalianensis strain_DLFJ1-1	Octadecabacter ascidiaceicola CECT_8868	Jannaschia aquimarina GSW-M26	Paracoccus isoporae DSM_22220
				Paracoccus yeei ATCC_BAA-599			Gemmobacter aquatilis DSM_3857	Litoreibacter ascidiaceicola DSM_100566	Thalassobacter stenotrophicus CECT_5294	Litoreibacter halocynthiae MA1-10_1	Celeribacter baekdonensis DSM_27375	Thioclava atlantica 13D2W-2	Yoonia litorea DSM_29433	Jannaschia helgolandensis DSM_14858	Paracoccus sediminis DSM_26170
				Paracoccus zhejiangensis J6			Rhodobacter blasticus DSM_2131	Litoreibacter halocynthiae MA1-10_1	Jannaschia seohaensis DSM_25227	Dinoroseobacter shibae DFL_12	Celeribacter indicus P73	Thioclava marina 11-10-0-13	Yoonia maricola DSM_29128	Jannaschia donghaensis CECT_7802	Paracoccus zeaxanthinifaciens ATCC_21588
				Paracoccus homiensis DSM_17862			Defluviimonas alba cai42	Dinoroseobacter shibae DFL_12	Jannaschia pohangensis DSM_19073	Thalassobacter stenotrophicus CECT_5294	Celeribacter neptunius DSM_26471	Thioclava pacifica DSM_10166	Shimia isoporae SW6_1	Jannaschia faecimaris DSM_100420	Paracoccus aestuarii DSM_19484
				Nioella sediminis JS7-11			Rhodobacter veldkampii DSM_11550	Thalassobacter stenotrophicus CECT_5294	Boseongicola aestuarii CECT_8489	Jannaschia seohaensis DSM_25227	Celeribacter persicus DSM_100434	Thioclava nitratireducens 25B10_4	Shimia haliotis DSM_28453	Maribius salinus DSM_26892	Paracoccus seriniphilus DSM_14827
				Roseibacterium elongatum DSM_19469			Paenirhodobacter enshiensis DW2-9	Jannaschia seohaensis DSM_25227	Halocynthiibacter namhaensis RA2-3	Jannaschia pohangensis DSM_19073	Celeribacter ethanolicus NH195	Thioclava sediminum TAW-CT134	Lutimaribacter saemankumensis DSM_28010	Maribius pelagius DSM_26893	Actibacterium ureilyticum LS-811
				Limimaricola soesokkakensis CECT_8367			Rhodobacter aestuarii DSM_19945	Jannaschia pohangensis DSM_19073	Octadecabacter antarcticus 307	Jannaschia rubra CECT_5088	Primorskyibacter marinus PX7	Thioclava electrotropha Elox9	Roseovarius nubinhibens ISM	Octadecabacter arcticus 238	Actibacterium atlanticum 22II-S11-z10
				Loktanella salsilacus DSM_16199			Rhodobacter viridis JA737	Boseongicola aestuarii CECT_8489	Flavimaricola marinus CECT_8899	Brevirhabdus pacifica 22DY15	Pseudooceanicola flagellatus CGMCC_1.12644	Methylarcula marina VKM_B-2159	Roseovarius albus CECT_7450	Octadecabacter temperatus SB1	Actibacterium mucosum KCTC_23349
				Yoonia vestfoldensis DSM_16212			Thioclava arenosa CAU_1312	Pseudoruegeria aquimaris CECT_7680	Cognatiyoonia sediminum DSM_28715	Boseongicola aestuarii CECT_8489	Thalassococcus halodurans DSM_26915	Actibacterium pelagium JN33	Pelagicola litorisediminis CECT_8287	Octadecabacter ascidiaceicola CECT_8868	Celeribacter manganoxidans DY25
				Roseovarius confluentis SAG6			Paracoccus chinensis CGMCC_1.7655	Halocynthiibacter namhaensis RA2-3	Cognatiyoonia koreensis DSM_17925	Halocynthiibacter namhaensis RA2-3	Salipiger mucosus DSM_16094	Rhodovulum robiginosum DSM_12329	Roseovarius tolerans DSM_11457	Yoonia litorea DSM_29433	Hasllibacter halocynthiae DSM_29318
							Paracoccus solventivorans DSM_6637	Maritimibacter alkaliphilus HTCC2654	Yoonia sediminilitoris DSM_29955	Aliiroseovarius crassostreae CV919-312	Salipiger marinus DSM_26424	Pseudoruegeria haliotis DSM_29328	Roseovarius nitratireducens TFZ	Yoonia rosea DSM_29591	Silicimonas algicola DSM_103371
							Paracoccus alkenifer DSM_11593	Celeribacter halophilus ZXM137	Pseudopelagicola gijangensis DSM_100564	Aliiroseovarius sediminilitoris DSM_29439	Salipiger aestuarii DSM_22011	Pseudoruegeria lutimaris DSM_25294	Roseovarius mucosus DSM_17069	Yoonia maricola DSM_29128	Maribius pontilimi GH1_23_1
							Paracoccus sanguinis DSM_29303	Octadecabacter antarcticus 307	Shimia aestuarii DSM_15283	Aliiroseovarius pelagivivens CECT_8811	Salipiger profundus JLT2016	Planktomarina temperata RCA23	Roseovarius indicus B108	Thalassobius activus CECT_5113	Tranquillimonas alkanivorans DSM_19547
							Paracoccus sphaerophysae HAMBI_3106	Roseisalinus antarcticus CECT_7023	Shimia abyssi DSM_100673	Aliiroseovarius halocynthiae MA1_10_1	Roseivivax pacificus DSM_29329	Nioella nitratireducens SSW136	Roseovarius atlanticus R12B	Shimia isoporae SW6_1	Oceaniovalibus guishaninsula JLT2003
							Paracoccus sulfuroxidans LW36_1	Flavimaricola marinus CECT_8899	Roseovarius aestuarii CECT_7745	Octadecabacter antarcticus 307	Tropicibacter naphthalenivorans DSM_19561	Jannaschia donghaensis CECT_7802	Roseovarius salinarum N53	Shimia haliotis DSM_28453	Palleronia abyssalis CECT_8504
							Paracoccus laeviglucosivorans 3P_1	Cognatiyoonia sediminum DSM_28715	Roseovarius lutimaris DSM_28463	Flavimaricola marinus CECT_8899	Ponticocus litoralis GL_GR66	Roseivivax roseus DSM_23042	Roseovarius halotolerans DSM_29507	Shimia marina CECT_7688	Pacificibacter maritimus DSM_104731
							Paracoccus bengalensis DSM_17099	Cognatiyoonia koreensis DSM_17925	Roseovarius marisflavi DSM_29327	Loktanella atrilutea DSM_29326	Marinibacterium profundimaris 22II1-22F33	Hwanghaeicola aestuarii DSM_22009	Ascidiaceihabitans donghaensis CECT_8599	Shimia sagamensis JAMH011_1	Marivivens niveibacter MCCC_1A06712
							Paracoccus versutus DSM_582	Yoonia sediminilitoris DSM_29955	Roseovarius gaetbuli CECT_8370	Cognatiyoonia sediminum DSM_28715		Octadecabacter arcticus 238	Sulfitobacter pontiacus DSM_10014	Lutimaribacter saemankumensis DSM_28010	Wenxinia saemankumensis DSM_100565
							Paracoccus tibetensis CGMCC_1.8925	Yoonia tamlensis DSM_26879	Roseovarius azorensis DSM_100674	Cognatiyoonia koreensis DSM_17925		Octadecabacter temperatus SB1	Sulfitobacter brevis DSM_11443	Thalassobius autumnalis CECT_5118	Wenxinia marina DSM_24838
							Paracoccus saliphilus DSM_18447	Salinihabitans flavidus DSM_27842	Pseudaestuariivita atlantica 22II-S11-z3	Yoonia sediminilitoris DSM_29955		Octadecabacter ascidiaceicola CECT_8868	Sulfitobacter mediterraneus DSM_12244	Roseovarius nubinhibens ISM	Pseudoroseicyclus aestuarii CECT_9025
							Confluentimicrobium lipolyticum CECT_8621	Pseudopelagicola gijangensis DSM_100564	Marinovum algicola FF3	Pseudopelagicola gijangensis DSM_100564		Oceanicola granulosus HTCC2516	Epibacterium multivorans DSM_26470	Roseovarius albus CECT_7450	Limimaricola pyoseonensis DSM_21424
							Rhodovulum imhoffii DSM_18064	Shimia aestuarii DSM_15283	Marivita hallyeonensis DSM_29431	Shimia aestuarii DSM_15283		Limimaricola hongkongensis DSM_17492	Epibacterium scottomollicae DSM_25328	Pelagicola litorisediminis CECT_8287	Cognatishimia maritima DSM_28223
							Roseicyclus mahoneyensis DSM_16097	Shimia abyssi DSM_100673	Marivita geojedonensis DPG-138	Shimia abyssi DSM_100673		Limimaricola cinnabarinus LL-001	Epibacterium mobile DSM_23403	Roseovarius tolerans DSM_11457	Pseudooceanicola antarcticus Ar-45
							Palleronia marisminoris CECT_7066	Litorimicrobium taeanense DSM_22007	Marivita cryptomonadis CL-SK44	Sediminimonas qiaohouensis DSM_21189		Yoonia maritima DSM_101533		Roseovarius nitratireducens TFZ	Pseudooceanicola marinus LMG_23705
							Loktanella fryxellensis DSM_16213	Lutimaribacter litoralis KU5D5_1	Pelagimonas varians DSM_23678	Roseovarius aestuarii CECT_7745		Yoonia litorea DSM_29433		Roseovarius mucosus DSM_17069	Pseudooceanicola atlanticus 2II-s11g
							Primorskyibacter insulae CECT_8871	Roseovarius aestuarii CECT_7745	Tropicibacter phthalicicus CECT_8649	Roseovarius lutimaris DSM_28463		Yoonia maricola DSM_29128		Roseovarius indicus B108	Thalassobius gelatinovorus CECT_4357
								Roseovarius lutimaris DSM_28463	Maliponia aquimaris CECT_8898	Roseovarius marisflavi DSM_29327		Shimia isoporae SW6_1		Roseovarius atlanticus R12B	Rhodosalinus sediminis WDN1C137
								Roseovarius marisflavi DSM_29327	Planktotalea frisia SH6-1	Roseovarius gaetbuli CECT_8370		Shimia haliotis DSM_28453		Roseovarius salinarum N53	Roseivivax halotolerans JCM_10271
								Roseovarius gaetbuli CECT_8370	Planktotalea arctica IMCC9565	Roseovarius azorensis DSM_100674		Pseudooceanicola nanhaiensis DSM_18065		Roseovarius halotolerans DSM_29507	Salipiger bermudensis HTCC2601
								Roseovarius azorensis DSM_100674	Sulfitobacter guttiformis DSM_11458	Roseovarius litoreus 1		Pseudooceanicola nitratireducens DSM_29619		Donghicola eburneus DSM_29127	Citreimonas salinaria DSM_26880
								Roseovarius pacificus DSM_29589	Sulfitobacter geojensis MM-124	Pseudaestuariivita atlantica 22II-S11-z3		Pseudooceanicola batsensis HTCC2597		Donghicola tyrosinivorans DSM_100212	Pseudodonghicola xiamenensis DSM_18339
								Pseudaestuariivita atlantica 22II-S11-z3	Sulfitobacter noctilucicola NB-77	Marinovum algicola FF3		Lutimaribacter saemankumensis DSM_28010		Ascidiaceihabitans donghaensis CECT_8599	Epibacterium ulvae U95
								Poseidonocella pacifica DSM_29316	Sulfitobacter noctilucae NB-68	Marivita hallyeonensis DSM_29431		Lutimaribacter pacificus W11_2B_1		Sulfitobacter marinus DSM_23422	Tritonibacter horizontis O3.65
								Poseidonocella sedimentorum KMM_9023	Aestuariivita boseongensis BS-B2	Marivita geojedonensis DPG-138		Thalassobius mediterraneus CECT_5383		Sulfitobacter pontiacus DSM_10014
								Marinovum algicola FF3	Sedimentitalea nanhaiensis DSM_24252	Marivita cryptomonadis CL-SK44		Roseovarius nubinhibens ISM		Sulfitobacter brevis DSM_11443
								Puniceibacterium sediminis DSM_29052	Jhaorihella thermophila DSM_23413	Pelagimonas varians DSM_23678		Pelagivirga sediminicola BH-SD19		Sulfitobacter delicatus DSM_16477
								Marivita hallyeonensis DSM_29431	Ruegeria pomeroyi DSS-3	Tropicibacter phthalicicus CECT_8649		Roseovarius nanhaiticus DSM_29590		Sulfitobacter dubius DSM_16472
								Marivita geojedonensis DPG-138	Ruegeria marina CGMCC_1.9108	Maliponia aquimaris CECT_8898		Roseovarius albus CECT_7450		Sulfitobacter indolifex HEL-45
								Marivita cryptomonadis CL-SK44	Ruegeria marisrubri ZGT118	Planktotalea frisia SH6-1		Pelagicola litorisediminis CECT_8287		Sulfitobacter mediterraneus DSM_12244
								Roseivivax lentus DSM_29430	Ruegeria arenilitoris CECT_8715	Planktotalea arctica IMCC9565		Roseovarius tolerans DSM_11457		Epibacterium multivorans DSM_26470
								Roseivivax isoporae LMG_25204	Ruegeria intermedia CC_GIMAT_2_1	Sulfitobacter guttiformis DSM_11458		Roseovarius nitratireducens TFZ		Epibacterium scottomollicae DSM_25328
								Roseivivax marinus DSM_27511	Ruegeria conchae TW15	Sulfitobacter geojensis MM-124		Roseovarius mucosus DSM_17069		Epibacterium mobile DSM_23403
								Roseivivax halodurans JCM_10272	Ruegeria halocynthiae DSM_27839	Sulfitobacter noctilucicola NB-77		Roseovarius indicus B108
								Salipiger thiooxidans DSM_10146	Ruegeria profundi ZGT108	Sulfitobacter noctilucae NB-68		Roseovarius atlanticus R12B
								Pelagibaca abyssi JLT2014	Ruegeria denitrificans CECT_5091	Aestuariivita boseongensis BS-B2		Roseovarius salinarum N53
								Pelagimonas varians DSM_23678	Ruegeria meonggei CECT_8411	Sedimentitalea nanhaiensis DSM_24252		Roseovarius halotolerans DSM_29507
								Tropicibacter phthalicicus CECT_8649	Ruegeria Faecimaris HD_28_2	Jhaorihella thermophila DSM_23413		Puniceibacterium antarcticum SM1211
								Sagittula stellata E-37	Ruegeria litorea R37_CECT_7639	Ruegeria pomeroyi DSS-3		Yangia pacifica CGMCC_1.3455
								Ponticoccus marisrubri SJ5A-1	Ruegeria mediterranea M17	Ruegeria marina CGMCC_1.9108		Ascidiaceihabitans donghaensis CECT_8599
								Maliponia aquimaris CECT_8898	Pseudophaeobacter arcticus DSM_23566	Ruegeria marisrubri ZGT118		Sulfitobacter litoralis DSM_17584
								Mameliella alba CGMCC_1.7290	Phaeobacter italicus CECT_7645	Ruegeria arenilitoris CECT_8715		Sulfitobacter pontiacus DSM_10014
								Antarctobacter heliothermus DSM_11445	Leisingera aquimarina DSM_24565	Ruegeria intermedia CC_GIMAT_2_1		Sulfitobacter brevis DSM_11443
								Planktotalea frisia SH6-1	Leisingera daeponensis DSM_23529	Ruegeria conchae TW15		Sulfitobacter mediterraneus DSM_12244
								Planktotalea arctica IMCC9565	Leisingera caerulea DSM_24564	Ruegeria halocynthiae DSM_27839		Epibacterium multivorans DSM_26470
								Sulfitobacter pseudonitzschiae H3	Leisingera methylohalidivorans DSM_14336	Ruegeria profundi ZGT108		Epibacterium scottomollicae DSM_25328
								Sulfitobacter guttiformis DSM_11458		Ruegeria denitrificans CECT_5091		Epibacterium mobile DSM_23403
								Sulfitobacter donghicola DSW-25		Ruegeria meonggei CECT_8411
								Sulfitobacter geojensis MM-124		Ruegeria Faecimaris HD_28_2
								Sulfitobacter noctilucicola NB-77		Ruegeria litorea R37_CECT_7639
								Sulfitobacter noctilucae NB-68		Ruegeria mediterranea M17
								Aestuariivita boseongensis BS-B2		Pseudophaeobacter arcticus DSM_23566
								Sedimentitalea nanhaiensis DSM_24252		Phaeobacter italicus CECT_7645
								Pseudooceanicola lipolyticus 157		Leisingera aquimarina DSM_24565
								Jhaorihella thermophila DSM_23413		Leisingera daeponensis DSM_23529
								Cribrihabitans marinus DSM_29340		Leisingera caerulea DSM_24564
								Ruegeria pomeroyi DSS-3		Leisingera methylohalidivorans DSM_14336
								Ruegeria marina CGMCC_1.9108
								Ruegeria marisrubri ZGT118
								Ruegeria arenilitoris CECT_8715
								Ruegeria intermedia CC_GIMAT_2_1
								Ruegeria conchae TW15
								Ruegeria halocynthiae DSM_27839
								Ruegeria profundi ZGT108
								Ruegeria denitrificans CECT_5091
								Ruegeria meonggei CECT_8411
								Ruegeria Faecimaris HD_28_2
								Ruegeria litorea R37_CECT_7639
								Ruegeria mediterranea M17
								Pseudophaeobacter leonis 306
								Pseudophaeobacter arcticus DSM_23566
								Phaeobacter porticola strain_P97
								Phaeobacter italicus CECT_7645
								Phaeobacter inhibens DSM_16374
								Phaeobacter gallaeciensis DSM_26640
								Leisingera aquimarina DSM_24565
								Leisingera daeponensis DSM_23529
								Leisingera caerulea DSM_24564
								Leisingera methylohalidivorans DSM_14336
